# Supplementary material for: ortho-Cyanomethylation of aryl fluoroalkyl sulfoxides via a sulfonium–Claisen rearrangement
Source: Royal Society of Chemistry journal article supplement (doi:10.1039/d3ob02102e), 2024-01-01

## Supporting Information

### ***ortho*-Cyanomethylation of Aryl Fluoroalkyl Sulfoxides via Sulfonium-Claisen Rearrangement**

Sheng Ye, Huanhuan Wang, Guoqing, Liang, Zhengkai Hu, Kun Wan, Lei Zhang\* and Bo Peng\*

#### Table of Contents

|                                                                                                       |    |
|-------------------------------------------------------------------------------------------------------|----|
| 1 General information .....                                                                           | 2  |
| 2 General procedure for the synthesis of starting materials .....                                     | 2  |
| 3 General procedure for the synthesis of <i>ortho</i> -cyanomethylated fluoroalkylthio arenes 2 ..... | 8  |
| 4 Gram-Scale reaction and elaboration of product 2c .....                                             | 18 |
| 5 NMR spectra .....                                                                                   | 22 |

## 1 General information

Unless otherwise indicated, all glassware was oven dried before use and all reactions were performed under an atmosphere of Nitrogen. All solvents were distilled from appropriate drying agents prior to use. All reagents were used as received from commercial suppliers. Reaction progress was monitored by thin layer chromatography (TLC) performed on plastic plates coated with silica gel GF254 with 0.2 mm thickness. Chromatograms were visualized by fluorescence quenching with UV light at 254 nm or by staining using potassium permanganate. Compound isolation was performed on chromatography column using silica gel 60 (160-200 mesh). Neat infrared spectra were recorded using a NEXUS670 FT-IR spectrometer. Wavelengths ( $\nu$ ) are reported in  $\text{cm}^{-1}$ . MS (EI) analysis was performed on Agilent GC-MS instrument. High-resolution mass spectrometry (HRMS) analysis was carried out using a TOF MS instrument with ESI or APCI source. All  $^1\text{H}$ ,  $^{13}\text{C}$  and  $^{19}\text{F}$  NMR spectra were recorded on Bruker AV-400 or AV-600. Chemical shifts were reported in parts per million (ppm), and the residual solvent peak was used as an internal reference: proton (chloroform  $\delta$  7.26), carbon (chloroform  $\delta$  77.16). Multiplicity was indicated as follows: s (singlet), d (doublet), t (triplet), q (quartet), m (multiplet), dd (doublet of doublet). Coupling constants were reported in Hertz (Hz).

## 2 General procedure for the synthesis of starting materials

Acetonitrile is commercially available. Aryl fluoroalkyl sulfoxides **1a**<sup>1</sup>, **1b**<sup>2</sup>, **1c**<sup>3</sup>, **1f**<sup>1</sup>, **1g**<sup>4</sup>, **1i**<sup>5</sup>, **1k**<sup>6</sup>, **1l**<sup>7</sup>, **1w**<sup>8</sup> and **1x**<sup>9</sup> are known compounds.

References:

- [1] A. Sperga, R. Melngaile, A. Kazia, S. Belyakov and J. Veliks, *J. Org. Chem.*, 2021, **86**, 3196.
- [2] Y. Nakayama, G. Ando, M. Abe, T. Koike and M. Akita, *ACS Catal*, 2019, **9**, 6555.
- [3] R. P. Singh, G. Cao, R. L. Kirchmeier and J. M. J. *J. Org. Chem.*, 1999, **64**, 2873.
- [4] W. Lu, W. Li, Y. Zhou, Y. Xie and W.-B. Chen, *Chinese Chemical Letters*, 2022, **33**, 4865.
- [5] C. Batisse, A. Panossian, G. Hanquet, F. R. Leroux, *Chem. Commun.*, 2018, **54**, 10423.
- [6] C. Batisse, M. F. Cespedes Davila, M. Castello, A. Messara, B. Vivet, G. Marciniak, A. Panossian, G. Hanquet and F. R. Leroux, *Tetrahedron*, 2019, **75**, 3063.
- [7] A. Messara, A. Panossian, K. Mikami, G. Hanquet and F. R. Leroux, *Angew. Chem. Int. Ed.*, 2023, **62**, e202215899.
- [8] M. Hu, J.-N. He, Y. Liu, T. Dong, M. Chen, C. Yan, Y. Ye and B. Peng, *Eur. J. Org. Chem.*, 2020, 193.

**(2-chlorophenyl)(fluoromethyl)sulfane (1d)**

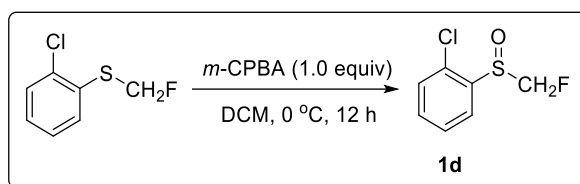

To a solution of aryl sulfide (5 mmol) in DCM (0.3 M) was added a solution of *m*-CPBA (1.0 equiv) in DCM (0.3 M) dropwise at 0 °C. Progress of the oxidation was checked by TLC. After completion of the reaction, saturated aqueous NaHCO<sub>3</sub> was added to the reaction mixture and the resulting solution was extracted with DCM. The combined organic layer was dried over Na<sub>2</sub>SO<sub>4</sub> and concentrated under reduced pressure. The resulting residue was further purified by column chromatography on silica gel to afford compound **1n** in 90% (0.87 g) as colorless oil. (R<sub>f</sub> = 0.3 eluent: Petroleum ether /EtOAc = 5/1).

**<sup>1</sup>H NMR (400 MHz, CDCl<sub>3</sub>):** δ 7.95 (dd, *J* = 7.7, 1.7 Hz, 1H), 7.60 – 7.55 (m, 1H), 7.54 – 7.50 (m, 1H), 7.44 (dd, *J* = 7.9, 1.3 Hz, 1H), 5.46 (dd, *J* = 47.5, 8.4 Hz, 1H), 5.10 (dd, *J* = 48.4, 8.4 Hz, 1H).

**<sup>13</sup>C NMR (101 MHz, CDCl<sub>3</sub>):** δ 136.2 (d, *J* = 8.4 Hz), 133.1, 130.6, 130.1, 128.4, 127.4, 97.5 (d, *J* = 221.8 Hz).

**<sup>19</sup>F NMR (377 MHz, CDCl<sub>3</sub>):** δ -213.9

**IR (neat):** 3066, 2922, 1572, 1449, 1105, 1012, 934, 875, 730, 522.

**HRMS (ESI-TOF):** calculated for [C<sub>7</sub>H<sub>6</sub>ClFOSNa (M + Na<sup>+</sup>): 214.9704, found: 214.9699.

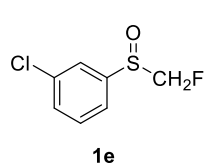

**1-chloro-3-((fluoromethyl)sulfinyl)benzene (1e)**

Following a procedure similar to the synthesis of **1d**, the title compound was prepared from 10 mmol of corresponding aryl sulfide and obtained as colorless oil, 1.7 g, 90% yield. (R<sub>f</sub> = 0.21, eluent: PE/EtOAc = 2/1)

**<sup>1</sup>H NMR (400 MHz, CDCl<sub>3</sub>):** δ 7.68 (d, *J* = 1.6 Hz, 1H), 7.57 – 7.47 (m, 3H), 5.10 (d, *J* = 47.7 Hz, 2H).

**<sup>13</sup>C NMR (101 MHz, CDCl<sub>3</sub>):** δ 140.9 (d, *J* = 6.4 Hz), 136.2, 132.4, 130.9, 124.8, 122.9, 97.9 (d, *J* = 223.0 Hz).

**<sup>19</sup>F NMR (377 MHz, CDCl<sub>3</sub>):** δ -212.6

**IR (neat):** 3058, 2928, 1575, 1461, 1022, 994, 781, 735, 675.

**HRMS (ESI-TOF):** calculated for [C<sub>7</sub>H<sub>6</sub>ClFOSNa (M + Na<sup>+</sup>): 214.9704, found: 214.9699.

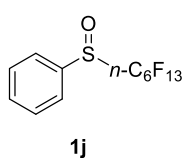

**((perfluorohexyl)sulfinyl)benzene (1j)**

Following a procedure similar to the synthesis of **1d**, the title compound was prepared from 10 mmol of corresponding aryl sulfide and obtained as colorless oil, 3.1 g, 70% yield. (R<sub>f</sub> = 0.49, eluent: PE/EtOAc = 5/1)

**<sup>1</sup>H NMR (600 MHz, CDCl<sub>3</sub>):** δ 7.81 (d, *J* = 8.0 Hz, 2H), 7.71 – 7.66 (m, 1H), 7.64 – 7.61 (m, 2H).

**<sup>13</sup>C NMR (151 MHz, CDCl<sub>3</sub>, C-F decoupling):** δ 135.2, 134.0, 131.3, 129.9, 129.6, 129.6, 129.6, 126.9, 117.3, 111.9, 110.9, 110.3.

**<sup>19</sup>F NMR (377 MHz, CDCl<sub>3</sub>):** δ -81.0, -111.4 (d, *J* = 245.3 Hz), -119.3–121.3 (m), -122.4 (d, *J* = 323.4 Hz), -122.7 (d, *J* = 245.3 Hz), -126.3.

**IR (neat):** 2367, 1447, 1233, 1198, 1128, 883, 747, 686, 531.

**HRMS (ESI-TOF):** calculated for [C<sub>12</sub>H<sub>5</sub>OF<sub>13</sub>SNa (M + Na<sup>+</sup>): 466.9746, found: 466.9747.

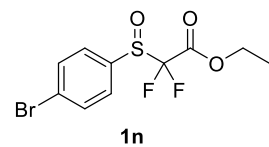

**ethyl 2-((4-bromophenyl)sulfinyl)-2,2-difluoroacetate (1n)**

Following a procedure similar to the synthesis of **1d**, the title compound was prepared from 10 mmol of corresponding aryl sulfide and obtained as colorless oil, 1.8 g, 55% yield. (R<sub>f</sub> = 0.44, eluent: PE/EtOAc = 5/1)

**<sup>1</sup>H NMR (600 MHz, CDCl<sub>3</sub>):** δ 7.72 (dd, *J* = 8.8, 1.8 Hz, 2H), 7.58 (d, *J* = 8.4 Hz, 2H), 4.33 – 4.25 (m, 2H), 1.28 (t, *J* = 7.2 Hz, 3H).

**<sup>13</sup>C NMR (151 MHz, CDCl<sub>3</sub>):** δ 159.2 (t, *J* = 27.5 Hz), 135.2, 132.8, 128.4, 127.6, 117.8 (t, *J* = 303.8 Hz), 64.5, 13.9.

**<sup>19</sup>F NMR (565 MHz, CDCl<sub>3</sub>):** δ -108.4 (d, *J* = 233.0 Hz), -111.4 (d, *J* = 237.1 Hz)

**IR (neat):** 3085, 2986, 1758, 1570, 1473, 1300, 1130, 1065, 819, 728

**HRMS (ESI-TOF):** calculated for [C<sub>10</sub>H<sub>9</sub>BrF<sub>2</sub>O<sub>3</sub>SNa (M + Na<sup>+</sup>): 348.9316, found: 348.9317.

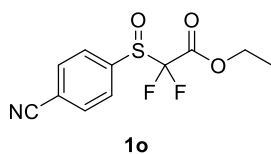

**ethyl 2-((4-cyanophenyl)sulfinyl)-2,2-difluoroacetate (1o)**

Following a procedure similar to the synthesis of **1d**, the title compound was prepared from 10 mmol of corresponding aryl sulfide and obtained as colorless oil, 1.7 g, 62% yield. ( $R_f = 0.5$ , eluent: PE/EtOAc = 5/1)

**$^1\text{H}$  NMR (600 MHz,  $\text{CDCl}_3$ ):**  $\delta$  7.94 – 7.80 (m, 4H), 4.36 – 4.31 (m, 2H), 1.32 (t,  $J = 7.2$  Hz, 3H).

**$^{13}\text{C}$  NMR (101 MHz,  $\text{CDCl}_3$ ):**  $\delta$  158.9 (t,  $J = 27.2$  Hz), 141.7, 133.0, 126.9, 118.0 (t,  $J = 304.1$  Hz), 117.4, 117.0, 64.8, 14.0.

**$^{19}\text{F}$  NMR (377 MHz,  $\text{CDCl}_3$ ):**  $\delta$  -106.7 (d,  $J = 248.3.0$  Hz), -110.6 (d,  $J = 237.6$  Hz)

**IR (neat):** 2916, 2234, 1759, 1301, 1132, 1090, 904, 724, 648, 551.

**HRMS (ESI-TOF):** calculated for  $[\text{C}_{11}\text{H}_9\text{F}_2\text{NO}_3\text{SNa} (\text{M} + \text{Na}^+)]$ : 296.0163, found: 296.0166

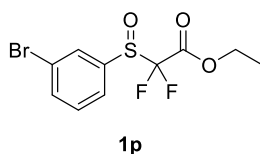

**ethyl 2-((3-bromophenyl)sulfinyl)-2,2-difluoroacetate (1p)**

Following a procedure similar to the synthesis of **1d**, the title compound was prepared from 10 mmol of corresponding aryl sulfide and obtained as colorless oil, 2.3 g, 70% yield. ( $R_f = 0.26$ , eluent: PE/EtOAc = 10/1)

**$^1\text{H}$  NMR (600 MHz,  $\text{CDCl}_3$ ):**  $\delta$  7.86 (s, 1H), 7.75 – 7.73 (m, 1H), 7.62 (d,  $J = 7.8$  Hz, 1H), 7.45 (t,  $J = 7.9$  Hz, 1H), 4.31 – 4.27 (m, 2H), 1.28 (t,  $J = 7.2$  Hz, 3H).

**$^{13}\text{C}$  NMR (151 MHz,  $\text{CDCl}_3$ ):**  $\delta$  159.1 (t,  $J = 28.1$  Hz), 138.3, 136.4, 130.9, 128.8, 124.7, 123.7, 118.1 (t,  $J = 303.2$  Hz), 64.5, 13.9.

**$^{19}\text{F}$  NMR (565 MHz,  $\text{CDCl}_3$ ):**  $\delta$  -108.3 (d,  $J = 221.6$  Hz), -110.6 (d,  $J = 231.2$  Hz)

**IR (neat):** 2990, 2252, 1758, 1460, 1296, 1095, 904, 784, 725, 676, 545.

**HRMS (ESI-TOF):** calculated for  $[\text{C}_{10}\text{H}_9\text{BrF}_2\text{O}_3\text{SNa} (\text{M} + \text{Na}^+)]$ : 348.9316, found: 348.9317.

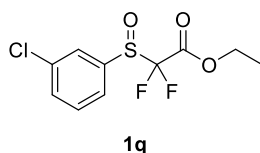

**ethyl 2-((3-chlorophenyl)sulfinyl)-2,2-difluoroacetate (1q)**

Following a procedure similar to the synthesis of **1d**, the title compound was prepared from 10 mmol of corresponding aryl sulfide and obtained as colorless oil, 1.8 g, 65% yield. ( $R_f = 0.21$  eluent: PE/EtOAc = 10/1)

**$^1\text{H}$  NMR (600 MHz,  $\text{CDCl}_3$ ):**  $\delta$  7.72 (s, 1H), 7.61 – 7.56 (m, 2H), 7.53 – 7.50 (m, 1H), 4.32 – 4.25 (m, 2H), 1.28 (t,  $J = 7.2$  Hz, 3H).

**<sup>13</sup>C NMR (101 MHz, CDCl<sub>3</sub>):** δ 159.1(t, *J* = 28.5 Hz), 138.2, 135.9, 133.5, 130.7, 126.0, 124.3, 118.0 (t, *J* = 302.6 Hz), 64.5, 13.9.

**<sup>19</sup>F NMR (565 MHz, CDCl<sub>3</sub>):** δ -108.3 (d, *J* = 228.2 Hz), -110.7 (d, *J* = 231.9 Hz)

**IR (neat):** 3063, 2986, 1760, 1463, 1300, 1131, 1011, 963, 786, 678.

**HRMS (ESI-TOF):** calculated for [C<sub>10</sub>H<sub>9</sub>ClF<sub>2</sub>O<sub>3</sub>SNa (M + Na<sup>+</sup>): 304.9821, found: 304.9824.

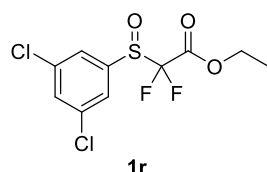

**ethyl 2-((3,5-dichlorophenyl)sulfinyl)-2,2-difluoroacetate (1r)**

Following a procedure similar to the synthesis of **1d**, the title compound was prepared from 10 mmol of corresponding aryl sulfide and obtained as colorless oil, 1.5 g, 48% yield. (*R*<sub>f</sub> = 0.33, eluent: PE/EtOAc = 10/1)

**<sup>1</sup>H NMR (600 MHz, CDCl<sub>3</sub>):** δ 7.62 – 7.56 (m, 3H), 4.34 (q, *J* = 7.1 Hz, 2H), 1.32 (t, *J* = 7.2 Hz, 3H).

**<sup>13</sup>C NMR (151 MHz, CDCl<sub>3</sub>):** δ 158.9 (t, *J* = 27.8 Hz), 139.8, 136.6, 133.3, 124.3, 118.0 (t, *J* = 302.8 Hz), 64.7, 14.0.

**<sup>19</sup>F NMR (565 MHz, CDCl<sub>3</sub>):** δ -107.4 (d, *J* = 230.0 Hz), -110.3 (d, *J* = 231.6 Hz).

**IR (neat):** 3069, 2988, 1761, 1567, 1304, 1139, 1107, 962, 801, 667, 554.

**HRMS (ESI-TOF):** calculated for [C<sub>10</sub>H<sub>8</sub>Cl<sub>2</sub>F<sub>2</sub>O<sub>3</sub>SNa (M + Na<sup>+</sup>): 338.9431, found: 338.9438.

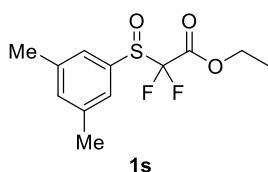

**ethyl 2-((3,5-dimethylphenyl)sulfinyl)-2,2-difluoroacetate (1s)**

Following a procedure similar to the synthesis of **1d**, the title compound was prepared from 10 mmol of corresponding aryl sulfide and obtained as colorless oil, 1.7 g, 62% yield. (*R*<sub>f</sub> = 0.24, eluent: PE/EtOAc = 10/1)

**<sup>1</sup>H NMR (400 MHz, CDCl<sub>3</sub>):** δ 7.31 (s, 2H), 7.22 (d, *J* = 0.6 Hz, 1H), 4.28 – 4.22 (m, 2H), 2.38 (s, 6H), 1.26 (t, *J* = 7.2 Hz, 3H).

**<sup>13</sup>C NMR (101 MHz, CDCl<sub>3</sub>):** δ 159.5 (t, *J* = 28.4 Hz), 139.5, 135.8, 135.1, 123.5, 118.1 (t, *J* = 303.1 Hz), 64.1, 21.3, 13.9.

**<sup>19</sup>F NMR (377 MHz, CDCl<sub>3</sub>):** δ -109.4 (d, *J* = 222.7 Hz), -111.3 (d, *J* = 228.7 Hz).

**IR (neat):** 2985, 1759, 1607, 1447, 1303, 1128, 1081, 963, 853, 683, 560.

**HRMS (ESI-TOF):** calculated for [C<sub>12</sub>H<sub>14</sub>F<sub>2</sub>O<sub>3</sub>SNa (M + Na<sup>+</sup>): 299.0524, found: 299.0524.

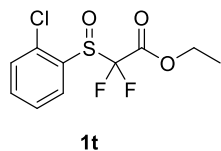

**ethyl 2-((2-chlorophenyl)sulfinyl)-2,2-difluoroacetate (1t)**

Following a procedure similar to the synthesis of **1d**, the title compound was prepared from 10 mmol of corresponding aryl sulfide and obtained as colorless oil, 2.0 g, 70% yield. (*R*<sub>f</sub> = 0.44, eluent: PE/EtOAc = 5/1)

**<sup>1</sup>H NMR (600 MHz, CDCl<sub>3</sub>):** δ 7.94 – 7.90 (m, 1H), 7.57 – 7.51 (m, 2H), 7.47 – 7.43 (m, 1H), 4.37 – 4.26 (m, 2H), 1.31 (t, *J* = 7.2 Hz, 3H).

**<sup>13</sup>C NMR (151 MHz, CDCl<sub>3</sub>):** δ 159.3 (t, *J* = 28.3 Hz), 135.2, 134.3, 133.3, 130.2, 128.2, 127.9, 119.0 (t, *J* = 302.4 Hz), 64.5, 13.9.

**<sup>19</sup>F NMR (565 MHz, CDCl<sub>3</sub>):** δ -106.5 (d, *J* = 219.3 Hz), -108.9 (d, *J* = 219.3 Hz)

**IR (neat):** 2987, 1759, 1452, 1303, 1132, 1084, 957, 760, 698, 459.

**HRMS (ESI-TOF):** calculated for [C<sub>10</sub>H<sub>9</sub>ClF<sub>2</sub>O<sub>3</sub>SNa (M + Na<sup>+</sup>)]: 304.9821, found: 304.9824.

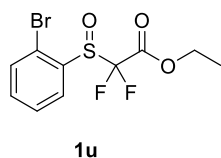

**ethyl 2-((2-bromophenyl)sulfinyl)-2,2-difluoroacetate (1u)**

Following a procedure similar to the synthesis of **1d**, the title compound was prepared from 10 mmol of corresponding aryl sulfide and obtained as colorless oil, 2.2 g, 68% yield. (*R*<sub>f</sub> = 0.27, eluent: PE/EtOAc = 10/1)

**<sup>1</sup>H NMR (600 MHz, CDCl<sub>3</sub>):** δ 7.90 (d, *J* = 7.9 Hz, 1H), 7.63 (d, *J* = 8.0 Hz, 1H), 7.61 – 7.58 (m, 1H), 7.50 – 7.47 (m, 1H), 4.40 – 4.27 (m, 2H), 1.32 (t, *J* = 7.2 Hz, 3H).

**<sup>13</sup>C NMR (151 MHz, CDCl<sub>3</sub>):** δ 159.4 (t, *J* = 29.2 Hz), 137.2, 134.5, 133.5, 128.8, 128.5, 121.8, 119.2 (t, *J* = 303.8 Hz), 64.5, 14.0.

**<sup>19</sup>F NMR (565 MHz, CDCl<sub>3</sub>):** δ -105.5 (d, *J* = 218.1 Hz), -108.3 (d, *J* = 218.3 Hz).

**IR (neat):** 2988, 1762, 1568, 1449, 1304, 1134, 1017, 955, 760, 537, 452.

**HRMS (ESI-TOF):** calculated for [C<sub>10</sub>H<sub>9</sub>BrF<sub>2</sub>O<sub>3</sub>SNa (M + Na<sup>+</sup>)]: 348.9316, found: 348.9317.

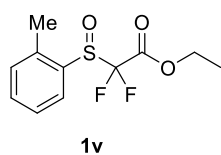

**ethyl 2,2-difluoro-2-(*o*-tolylsulfinyl)acetate (1v)**

Following a procedure similar to the synthesis of **1d**, the title compound was prepared from 10 mmol of corresponding aryl sulfide and obtained as colorless oil, 1.8g, 70% yield. (*R*<sub>f</sub> = 0.35, eluent: PE/EtOAc = 10/1)

**<sup>1</sup>H NMR (600 MHz, CDCl<sub>3</sub>):** δ 7.91 (d, *J* = 7.8 Hz, 1H), 7.51 – 7.48 (m, 1H), 7.47 – 7.42 (m, 1H), 7.28 (d, *J* = 7.5 Hz, 1H), 4.30 – 4.21 (m, 2H), 2.46 (s, 3H), 1.27 (t, *J* = 7.2 Hz, 3H).

**<sup>13</sup>C NMR (101 MHz, CDCl<sub>3</sub>):** δ 159.6 (t, *J* = 27.6 Hz), 138.4, 134.9, 133.0, 131.3, 127.1, 126.2, 119.0 (t, *J* = 303.6 Hz), 64.3, 18.6, 13.9.

**<sup>19</sup>F NMR (565 MHz, CDCl<sub>3</sub>):** δ -106.2 (d, *J* = 226.1 Hz), -110.7 (d, *J* = 230.9 Hz)

**IR (neat):** 2987, 1759, 1473, 1300, 1130, 1011, 962, 759, 562, 457.

**HRMS (ESI-TOF):** calculated for [C<sub>11</sub>H<sub>12</sub>F<sub>2</sub>O<sub>3</sub>SNa (M + Na<sup>+</sup>): 285.0367, found: 285.0371.

### 3 General procedure for the synthesis of *ortho*-cyanomethylated fluoroalkylthio arenes **2**

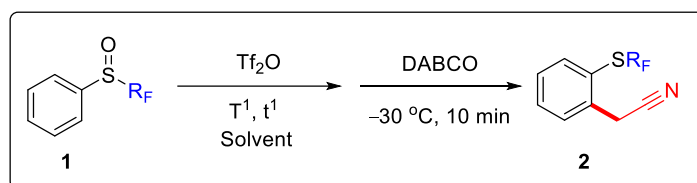

To a mixture of aryl fluoroalkyl sulfoxides (**1**, 0.5 mmol) in solvent (3 mL) was added Tf<sub>2</sub>O (126 μL, 0.75 mmol) at T<sup>1</sup> (−30 to 50 °C). After stirring for t<sup>1</sup> (10 min to 5 h), DABCO (112 mg, 1.0 mmol) was added to the mixture under the same temperature. The mixture was then stirred for another 10 min. After that, the mixture was passed through a short silica gel column and concentrated under vacuum. The resulting residue was further purified by silica gel column chromatography to give compounds **2**.

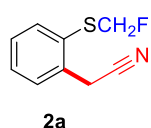

#### **2-2-((fluoromethyl)thio)phenylacetonitrile (2a)**

Following the general procedure, using acetonitrile as solvent, T<sup>1</sup> (−30 °C), t<sup>1</sup> (10 min), the title compound was obtained as colorless oil, 63 mg, 70% yield. (R<sub>f</sub> =

0.31, eluent: PE/EtOAc = 10/1)

**<sup>1</sup>H NMR (400 MHz, CDCl<sub>3</sub>):** δ 7.66 (dd, *J* = 7.4, 1.7 Hz, 1H), 7.55 – 7.50 (m, 1H), 7.43 – 7.35 (m, 2H), 5.66 (d, *J* = 52.3 Hz, 2H), 3.96 (s, 2H).

**<sup>13</sup>C NMR (101 MHz, CDCl<sub>3</sub>):** δ 134.1 (d, *J* = 1.5 Hz), 133.0 (d, *J* = 3.0 Hz), 132.7 (d, *J* = 2.2 Hz), 129.7, 129.6, 129.4, 117.7, 89.0 (d, *J* = 220.2 Hz), 22.9.

**<sup>19</sup>F NMR (377 MHz, CDCl<sub>3</sub>):** δ -182.5 (t, *J* = 52.3 Hz).

**IR (neat):** 2923, 2252, 1721, 1473, 1321, 962, 905, 728, 752, 649.

**HRMS (ESI-TOF):** calculated for [C<sub>9</sub>H<sub>8</sub>FNSNa (M + Na<sup>+</sup>): 204.0254, found: 204.0255.



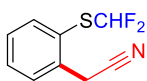

**2b**

### 2-(2-((difluoromethyl)thio)phenyl)acetonitrile (**2b**)

Following the procedure of **2a**, the title compound was obtained as colorless oil, 76 mg, 76% yield. ( $R_f = 0.3$ , eluent: PE/EtOAc = 10/1)

**$^1\text{H}$  NMR (600 MHz,  $\text{CDCl}_3$ ):**  $\delta$  7.70 (dd,  $J = 7.7, 0.8$  Hz, 1H), 7.62 (d,  $J = 7.7$  Hz, 1H), 7.53 – 7.50 (m, 1H), 7.41 – 7.39 (m, 1H), 6.81 (t,  $J = 56.3$  Hz, 1H), 4.03 (s, 2H).

**$^{13}\text{C}$  NMR (151 MHz,  $\text{CDCl}_3$ ):**  $\delta$  138.7, 135.9, 131.6, 129.8, 129.4, 124.6, 120.2 (t,  $J = 276.8$  Hz), 117.6, 23.2.

**$^{19}\text{F}$  NMR (565 MHz,  $\text{CDCl}_3$ ):**  $\delta$  -91.4 (d,  $J = 57.2$  Hz).

**IR (neat):** 2920, 2249, 1474, 1316, 1068, 1032, 904, 794, 748, 439.

**HRMS (ESI-TOF):** calculated for  $[\text{C}_9\text{H}_7\text{F}_2\text{NSNa} (\text{M} + \text{Na}^+)]$ : 222.0159, found: 222.0157.

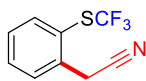

**2c**

### 2-(2-((trifluoromethyl)thio)phenyl)acetonitrile (**2c**)

Following the general procedure, using acetonitrile as solvent,  $T^1$  (50 °C),  $t^1$  (5 h), the title compound was obtained as colorless oil, 87 mg, 80% yield. ( $R_f = 0.5$ , eluent:

PE/EtOAc = 5/1)

**$^1\text{H}$  NMR (600 MHz,  $\text{CDCl}_3$ ):**  $\delta$  7.77 (d,  $J = 7.7$  Hz, 1H), 7.67 (d,  $J = 7.7$  Hz, 1H), 7.60 – 7.57 (m, 1H), 7.45 – 7.42 (m, 1H), 4.07 (s, 2H).

**$^{13}\text{C}$  NMR (151 MHz,  $\text{CDCl}_3$ ):**  $\delta$  139.4, 136.2, 132.7, 130.0, 129.7, 129.3 (q,  $J = 310.0$  Hz), 123.4, 117.3, 23.1.

**$^{19}\text{F}$  NMR (377 MHz,  $\text{CDCl}_3$ ):**  $\delta$  -42.3.

**IR (neat):** 2917, 2360, 2253, 1475, 1130, 1103, 905, 760, 729, 649, 462.

**HRMS (ESI-TOF):** calculated for  $[\text{C}_9\text{H}_6\text{F}_3\text{NSNa} (\text{M} + \text{Na}^+)]$ : 240.0065, found: 240.0066.

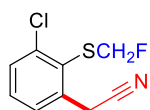

**2d**

### 2-(3-chloro-2-((fluoromethyl)thio)phenyl)acetonitrile (**2d**)

Following the procedure of **2a**, the title compound was obtained as colorless oil, 70 mg, 65% yield. ( $R_f = 0.5$ , eluent: PE/EtOAc = 5/1)

**$^1\text{H}$  NMR (400 MHz,  $\text{CDCl}_3$ ):**  $\delta$  7.55 – 7.52 (m, 2H), 7.40 (dd,  $J = 10.0, 5.8$  Hz, 1H), 5.62 (d,  $J = 52.0$  Hz, 2H), 4.15 (s, 2H).

**$^{13}\text{C}$  NMR (151 MHz,  $\text{CDCl}_3$ ):**  $\delta$  140.9 (d,  $J = 2.3$  Hz), 138.3, 131.5, 130.6, 130.1, 127.8, 117.6, 88.7 (d,  $J = 222.2$  Hz), 24.5.

**<sup>19</sup>F NMR (565 MHz, CDCl<sub>3</sub>):** δ -185.1 (t, *J* = 52.3 Hz).

**IR (neat):** 2947, 2254, 1562, 1445, 1319, 1152, 966, 905, 779, 720, 648.

**HRMS (ESI-TOF):** calculated for [C<sub>9</sub>H<sub>7</sub>ClFNSNa (M + Na<sup>+</sup>): 237.9864, found: 237.9868.

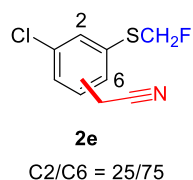

**2-(4-chloro-2-((fluoromethyl)thio)phenyl)acetonitrile (2e)**

Following the procedure of **2a**, the title compound was obtained as colorless oil, 86 mg, 80% yield. (R<sub>f</sub> = 0.5, eluent: PE/EtOAc = 5/1)

**<sup>1</sup>H NMR (400 MHz, CDCl<sub>3</sub>)** (Reio-isomers of **2e** (C2/C6 = 25/75) were obtained): δ 7.64 (d, *J* = 2.2 Hz, 0.75H, C6), 7.61 (dd, *J* = 7.8, 1.2 Hz, 0.25H, C2), 7.47 – 7.45 (m, 1H), 7.37 (dd, *J* = 8.3, 2.2 Hz, 0.75H, C6), 7.32 (t, *J* = 8.0 Hz, 0.25H, C2), 5.69 (d, *J* = 51.7 Hz, 0.5H), 5.68 (d, *J* = 52.5 Hz, 1.5H), 4.13 (s, 0.5H, C2), 3.90 (s, 1.5H, C6).

**<sup>13</sup>C NMR (101 MHz, CDCl<sub>3</sub>):** δ 136.0 (d, *J* = 2.9 Hz), 135.6, 135.1, 134.7 (d, *J* = 2.7 Hz), 133.0 (d, *J* = 1.6 Hz), 132.5 (d, *J* = 1.6 Hz), 130.8 (d, *J* = 2.2 Hz), 130.6, 130.4, 130.3 (d, *J* = 2.9 Hz), 129.6, 117.1, 116.3, 88.6 (d, *J* = 219.1 Hz), 88.3 (d, *J* = 219.1 Hz), 22.4, 20.7.

**<sup>19</sup>F NMR (377 MHz, CDCl<sub>3</sub>):** δ -183.1(t, *J* = 52.6 Hz), -183.4 (t, *J* = 51.2 Hz).

**IR (neat):** 2948, 2252, 1584, 1471, 1321, 1103, 964, 906, 814, 725.

**HRMS (ESI-TOF):** calculated for [C<sub>9</sub>H<sub>7</sub>ClFNSNa (M + Na<sup>+</sup>): 237.9864, found: 237.9868.

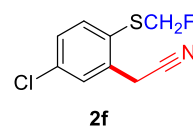

**2-(5-chloro-2-((fluoromethyl)thio)phenyl)acetonitrile (2f)**

Following the procedure of **2a**, the title compound was obtained as colorless oil, 78 mg, 73% yield. (R<sub>f</sub> = 0.5, eluent: PE/EtOAc = 5/1)

**<sup>1</sup>H NMR (400 MHz, CDCl<sub>3</sub>):** δ 7.59 (d, *J* = 8.4 Hz, 1H), 7.53 (d, *J* = 2.2 Hz, 1H), 7.35 (dd, *J* = 8.3, 2.2 Hz, 1H), 5.62 (d, *J* = 52.1 Hz, 2H), 3.94 (s, 2H).

**<sup>13</sup>C NMR (101 MHz, CDCl<sub>3</sub>):** δ 135.9, 135.4 (d, *J* = 2.1 Hz), 134.5 (d, *J* = 2.3 Hz), 131.3 (d, *J* = 2.8 Hz), 129.7, 129.4, 117.0, 88.9 (d, *J* = 219.5 Hz), 22.9.

**<sup>19</sup>F NMR (377 MHz, CDCl<sub>3</sub>):** δ -182.9 (t, *J* = 52.6 Hz).

**IR (neat):** 2945, 2253, 1582, 1466, 1106, 904, 820, 724, 648.

**HRMS (ESI-TOF):** calculated for [C<sub>9</sub>H<sub>7</sub>ClFNSNa (M + Na<sup>+</sup>): 237.9864, found: 237.9868.

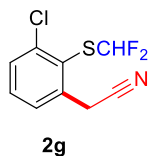

**2-(3-chloro-2-((difluoromethyl)thio)phenyl)acetonitrile (2g)**

Following the procedure of **2a**, the title compound was obtained as colorless oil, 40 mg, 34% yield. ( $R_f = 0.27$ , eluent: PE/EtOAc = 10/1)

**$^1\text{H}$  NMR (600 MHz,  $\text{CDCl}_3$ ):**  $\delta$  7.57 (d,  $J = 8.0$  Hz, 2H), 7.48 – 7.45 (m, 1H), 6.85 (t,  $J = 57.1$  Hz, 1H), 4.12 (s, 2H).

**$^{13}\text{C}$  NMR (101 MHz,  $\text{CDCl}_3$ ):**  $\delta$  142.6, 139.1, 132.5, 130.6, 128.2, 124.3 (d,  $J = 2.8$  Hz), 120.0 (t,  $J = 277.9$  Hz), 117.2, 24.4.

**$^{19}\text{F}$  NMR (377 MHz,  $\text{CDCl}_3$ ):**  $\delta$  -91.7

**IR (neat):** 2924, 2252, 1562, 1447, 1297, 1153, 1036, 905, 782, 759.

**HRMS (ESI-TOF):** calculated for  $[\text{C}_9\text{H}_6\text{ClF}_2\text{NSNa} (\text{M} + \text{Na}^+)]$ : 255.9770, found: 255.9767.

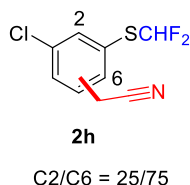

**2-(4-chloro-2-((difluoromethyl)thio)phenyl)acetonitrile (2h)**

Following the procedure of **2a**, the title compound was obtained as colorless oil, 90 mg, 77% yield. ( $R_f = 0.28$ , eluent: PE/EtOAc = 10/1)

**$^1\text{H}$  NMR (400 MHz,  $\text{CDCl}_3$ )** (Reio-isomers of **2h** ( $\text{C}2/\text{C}6 = 25/75$ ) were obtained):  $\delta$  7.70 (d,  $J = 2.2$  Hz, 0.75H, C6), 7.66 (dd,  $J = 7.8, 1.1$  Hz, 0.25H, C2), 7.59 – 7.54 (m, 1H), 7.51 – 7.48 (m, 0.75H, C6), 7.36 (t,  $J = 8.0$  Hz, 0.25H, C2), 6.85 (t,  $J = 54.9$  Hz, 0.25H, C2), 6.85 (t,  $J = 55.4$  Hz, 0.75H, C6), 4.19 (s, 0.5H, C2), 3.99 (s, 1.5H, C6).

**$^{13}\text{C}$  NMR (101 MHz,  $\text{CDCl}_3$ ):**  $\delta$  138.0, 137.3, 136.1, 134.9, 134.3, 132.6, 131.7, 130.8, 130.2, 127.5 (d,  $J = 3.1$  Hz), 126.1 (d,  $J = 3.1$  Hz), 122.5, 119.7 (t,  $J = 277.4$  Hz), 117.2, 116.1, 22.8, 21.2.

**$^{19}\text{F}$  NMR (377 MHz,  $\text{CDCl}_3$ ):**  $\delta$  -91.2, -91.5.

**IR (neat):** 2968, 2257, 1585, 1473, 1412, 1315, 1035, 911, 819, 753.

**HRMS (ESI-TOF):** calculated for  $[\text{C}_9\text{H}_6\text{ClF}_2\text{NSNa} (\text{M} + \text{Na}^+)]$ : 255.9770, found: 255.9767.

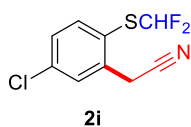

**2-(5-chloro-2-((difluoromethyl)thio)phenyl)acetonitrile (2i)**

Following the procedure of **2a**, the title compound was obtained as colorless oil, 82 mg, 70% yield. ( $R_f = 0.5$ , eluent: PE/EtOAc = 5/1)

**$^1\text{H}$  NMR (400 MHz,  $\text{CDCl}_3$ ):**  $\delta$  7.65 – 7.62 (m, 2H), 7.39 (dd,  $J = 8.3, 2.3$  Hz, 1H), 6.79 (t,  $J = 56.0$  Hz, 1H), 4.01 (s, 2H).

**$^{13}\text{C}$  NMR (101 MHz,  $\text{CDCl}_3$ ):**  $\delta$  139.9, 138.2, 137.7, 130.0, 129.7, 122.7 (d,  $J = 3.3$  Hz), 119.7 (t,  $J = 279.7$  Hz), 116.7, 23.2.

**<sup>19</sup>F NMR (377 MHz, CDCl<sub>3</sub>):** δ -91.5.

**IR (neat):** 2926, 2256, 1581, 1466, 1314, 1187, 1065, 1027, 824, 754.

**HRMS (ESI-TOF):** calculated for [C<sub>9</sub>H<sub>6</sub>ClF<sub>2</sub>NSNa (M + Na<sup>+</sup>): 255.9770, found: 255.9767.

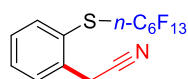

**2-(2-((perfluorohexyl)thio)phenyl)acetonitrile (2j)**

**2j**

Following the procedure of **2c**, the title compound was obtained as colorless oil,

210 mg, 90% yield. (R<sub>f</sub> = 0.5, eluent: PE/EtOAc = 5/1)

**<sup>1</sup>H NMR (600 MHz, CDCl<sub>3</sub>):** δ 7.75 (d, *J* = 7.7 Hz, 1H), 7.70 (d, *J* = 7.6 Hz, 1H), 7.62 – 7.59 (m, 1H), 7.45 – 7.43 (m, 1H), 4.06 (s, 2H).

**<sup>13</sup>C NMR (101 MHz, CDCl<sub>3</sub>, C-F decoupling):** δ 140.2, 137.0, 132.9, 130.1, 129.6, 123.4, 121.8, 117.3, 117.2, 111.1, 111.0, 110.4, 108.6, 23.1.

**<sup>19</sup>F NMR (377 MHz, CDCl<sub>3</sub>, F-F decoupling):** δ -80.8, -86.1, -119.3, -121.4, -122.8, -126.1.

**IR (neat):** 2917, 2257, 1475, 1234, 1195, 1144, 909, 735, 707, 636, 447.

**HRMS (ESI-TOF):** calculated for [C<sub>14</sub>H<sub>6</sub>F<sub>13</sub>NSNa (M + Na<sup>+</sup>): 489.9906, found: 489.9912.

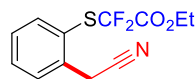

**2k**

**ethyl 2-((2-(cyanomethyl)phenyl)thio)-2,2-difluoroacetate (2k):**

Following the general procedure, using DCM/MeCN (volume ratio: 2:1) as solvent, T<sup>1</sup> (-30 °C), t<sup>1</sup>(1 h). the title compound was obtained as colorless oil,

117 mg, 86% yield. (R<sub>f</sub> = 0.25, eluent: PE/EtOAc = 10/1)

**<sup>1</sup>H NMR (400 MHz, CDCl<sub>3</sub>):** δ 7.70 (d, *J* = 7.7 Hz, 1H), 7.66 (dd, *J* = 7.7, 0.8 Hz, 1H), 7.57 – 7.53 (m, 1H), 7.42 – 7.38 (m, 1H), 4.28 (q, *J* = 7.2 Hz, 2H), 4.07 (s, 2H), 1.29 (t, *J* = 7.2 Hz, 3H).

**<sup>13</sup>C NMR (101 MHz, CDCl<sub>3</sub>):** δ 161.3 (t, *J* = 31.3 Hz), 161.0, 139.5, 136.6, 132.3, 129.8, 129.3, 120.3 (t, *J* = 288.6 Hz), 117.5, 64.1, 23.1, 13.9.

**<sup>19</sup>F NMR (377 MHz, CDCl<sub>3</sub>):** δ -80.8.

**IR (neat):** 2985, 2253, 1760, 1473, 1443, 1292, 1098, 1056, 972, 757.

**HRMS (ESI-TOF):** calculated for [C<sub>12</sub>H<sub>11</sub>F<sub>2</sub>O<sub>2</sub>NSNa (M + Na<sup>+</sup>): 294.0371, found: 294.0373.

**ethyl 2-((2-(cyanomethyl)-4-methylphenyl)thio)-2,2-difluoroacetate (2l)**

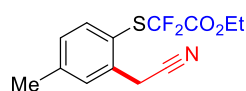

**2l**

Following the procedure of **2k**, the title compound was obtained as colorless oil, 107 mg, 75% yield. ( $R_f = 0.25$ , eluent: PE/EtOAc = 20/1)

**$^1\text{H NMR}$  (400 MHz,  $\text{CDCl}_3$ ):**  $\delta$  7.56 (d,  $J = 7.9$  Hz, 1H), 7.46 (s, 1H), 7.22 – 7.17 (m, 1H), 4.28 (q,  $J = 7.1$  Hz, 2H), 4.03 (s, 2H), 2.42 (s, 3H), 1.30 (t,  $J = 7.2$  Hz, 3H).

**$^{13}\text{C NMR}$  (101 MHz,  $\text{CDCl}_3$ ):**  $\delta$  161.4 (t,  $J = 31.8$  Hz), 143.2, 139.4, 136.3, 130.5, 130.1, 123.1, 120.3 (t,  $J = 287.3$  Hz), 117.7, 64.1, 23.0, 21.5, 13.9.

**$^{19}\text{F NMR}$  (377 MHz,  $\text{CDCl}_3$ ):**  $\delta$  -81.2.

**IR (neat):** 2985, 2250, 1760, 1479, 1446, 1291, 1100, 972, 820, 723.

**HRMS (ESI-TOF):** calculated for  $[\text{C}_{13}\text{H}_{13}\text{F}_2\text{O}_2\text{NSNa} (\text{M} + \text{Na}^+)]$ : 308.0527, found: 308.0528.

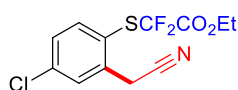

**2m**

**ethyl 2-((4-chloro-2-(cyanomethyl)phenyl)thio)-2,2-difluoroacetate (2m)**

Following the procedure of **2k**, the title compound was obtained as colorless oil, 110 mg, 72% yield. ( $R_f = 0.27$ , eluent: PE/EtOAc = 20/1)

**$^1\text{H NMR}$  (400 MHz,  $\text{CDCl}_3$ ):**  $\delta$  7.66 (d,  $J = 2.2$  Hz, 1H), 7.63 (d,  $J = 8.3$  Hz, 1H), 7.39 (dd,  $J = 8.3$ , 2.3 Hz, 1H), 4.31 (q,  $J = 7.1$  Hz, 2H), 4.03 (s, 2H), 1.32 (t,  $J = 7.2$  Hz, 3H).

**$^{13}\text{C NMR}$  (101 MHz,  $\text{CDCl}_3$ ):**  $\delta$  161.1 (t,  $J = 31.8$  Hz), 140.5, 138.9, 138.2, 130.0, 129.6, 122.2, 120.0 (t,  $J = 289.4$  Hz), 116.9, 64.3, 23.1, 13.9.

**$^{19}\text{F NMR}$  (377 MHz,  $\text{CDCl}_3$ ):**  $\delta$  -80.6.

**IR (neat):** 2983, 2265, 1759, 1582, 1466, 1298, 1103, 970, 823, 717.

**HRMS (ESI-TOF):** calculated for  $[\text{C}_{12}\text{H}_{10}\text{ClF}_2\text{O}_2\text{NSNa} (\text{M} + \text{Na}^+)]$ : 327.9981, found: 327.9984.

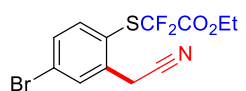

**2n**

**ethyl 2-((4-bromo-2-(cyanomethyl)phenyl)thio)-2,2-difluoroacetate (2n)**

Following the procedure of **2k**, the title compound was obtained as colorless oil, 122 mg, 70% yield. ( $R_f = 0.26$ , eluent: PE/EtOAc = 20/1).

**$^1\text{H NMR}$  (600 MHz,  $\text{CDCl}_3$ ):**  $\delta$  7.82 (s, 1H), 7.55 (s, 2H), 4.32 (q,  $J = 7.2$  Hz, 2H), 4.03 (s, 2H), 1.33 (t,  $J = 7.2$  Hz, 3H).

**<sup>13</sup>C NMR (151 MHz, CDCl<sub>3</sub>):** δ 161.1(t, *J* = 31.2 Hz), 140.6, 138.3, 132.9, 132.6, 127.1, 122.8, 119.9 (t, *J* = 287.5 Hz), 116.9, 64.4, 23.0, 14.0.

**<sup>19</sup>F NMR (565 MHz, CDCl<sub>3</sub>):** δ -80.6.

**IR (neat):** 2988, 2261, 1759, 1465, 1295, 1091, 1007, 971, 821, 715.

**HRMS (ESI-TOF):** calculated for [C<sub>12</sub>H<sub>10</sub>BrF<sub>2</sub>O<sub>2</sub>NSNa (M + Na<sup>+</sup>): 371.9476, found: 371.9474.

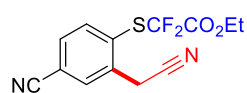

**2o**

**ethyl 2-((4-cyano-2-(cyanomethyl)phenyl)thio)-2,2-difluoroacetate (2o)**

Following the procedure of **2k**, the title compound was obtained as light yellow oil, 44 mg, 30% yield. (*R*<sub>f</sub> = 0.24, eluent: PE/EtOAc = 10/1).

**<sup>1</sup>H NMR (400 MHz, CDCl<sub>3</sub>):** δ 7.94 (d, *J* = 1.2 Hz, 1H), 7.85 (d, *J* = 8.0 Hz, 1H), 7.70 (dd, *J* = 8.0, 1.7 Hz, 1H), 4.35 (q, *J* = 7.1 Hz, 2H), 4.08 (s, 2H), 1.34 (t, *J* = 7.2 Hz, 3H).

**<sup>13</sup>C NMR (151 MHz, CDCl<sub>3</sub>):** δ 160.7 (t, *J* = 31.2 Hz), 139.8, 137.9, 132.8, 132.4, 130.0, 119.9 (t, *J* = 291.4 Hz), 117.1, 116.3, 116.2, 64.6, 23.2, 14.0.

**<sup>19</sup>F NMR (377 MHz, CDCl<sub>3</sub>):** δ -79.4.

**IR (neat):** 2923, 2235, 2210, 1762, 1474, 1301, 1131, 1095, 973, 837, 723.

**HRMS (ESI-TOF):** calculated for [C<sub>13</sub>H<sub>10</sub>F<sub>2</sub>N<sub>2</sub>O<sub>2</sub>NSNa (M + Na<sup>+</sup>): 319.0323, found: 319.0330.

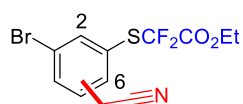

**2p**

C2/C6 = 7/93

**ethyl 2-((5-bromo-2-(cyanomethyl)phenyl)thio)-**

**2,2-difluoroacetate (2p)**

Following the procedure of **2k**, the title compound was obtained as colorless oil, 108 mg, 62% yield. (*R*<sub>f</sub> = 0.26, eluent: PE/EtOAc = 10/1).

**<sup>1</sup>H NMR (600 MHz, CDCl<sub>3</sub>)** (Reio-isomers of **2p** (C2/C6 = 7/93) were obtained): δ 7.86 (d, *J* = 2.0 Hz, 0.93H, C6), 7.79 – 7.77 (m, 0.07H, C2), 7.73 – 7.66 (m, 1H), 7.54 (d, *J* = 8.3 Hz, 0.93H, C6), 7.29 (t, *J* = 7.9 Hz, 0.07H, C2), 4.36 – 4.29 (m, 2H), 4.24 (s, 0.14H, C2), 4.01 (s, 1.86H, C6), 1.34 – 1.31 (m, 3H).

**<sup>13</sup>C NMR (151 MHz, CDCl<sub>3</sub>):** δ 161.0 (t, *J* = 31.0 Hz), 141.7, 136.7, 135.5, 135.3, 131.0, 130.4, 125.8, 122.6, 120.1 (t, *J* = 288.9 Hz), 117.0, 115.6, 64.4, 53.6, 22.8, 14.0.

**<sup>19</sup>F NMR (565 MHz, CDCl<sub>3</sub>):** δ -80.4, -80.5.

**IR (neat):** 2985, 2385, 2257, 1760, 1470, 1293, 1099, 972, 815, 784, 717.

**HRMS (ESI-TOF):** calculated for [C<sub>12</sub>H<sub>10</sub>BrF<sub>2</sub>O<sub>2</sub>NSNa (M + Na<sup>+</sup>): 371.9476, found: 371.9474.

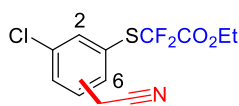

**2q**

C2/C6 = 12:88

**ethyl 2-((5-chloro-2-(cyanomethyl)phenyl)thio)-**

**2,2-difluoroacetate (2q)**

Following the procedure of **2k**, the title compound was obtained as light yellow oil, 124 mg, 81% yield. (R<sub>f</sub> = 0.22, eluent: PE/EtOAc = 10/1).

**<sup>1</sup>H NMR (600 MHz, CDCl<sub>3</sub>)** (Reio-isomers of **2q** (C2/C6 = 12/88) were obtained): δ 7.73 (s, 0.12H, C2), 7.71 (d, *J* = 2.1 Hz, 0.88H, C6), 7.67 (d, *J* = 7.8 Hz, 0.12H, C2), 7.60 (d, *J* = 8.3 Hz, 0.88H, C6), 7.53 (dd, *J* = 8.3, 2.1 Hz, 0.88H, C6), 7.37 (t, *J* = 8.0 Hz, 0.12H, C2), 4.34 – 4.30 (m, 2H), 4.20 (s, 0.24H, C2), 4.02 (s, 0.76H, C6), 1.34 – 1.31 (m, 3H).

**<sup>13</sup>C NMR (151 MHz, CDCl<sub>3</sub>)**: δ, 161.00 (t, *J* = 31.4 Hz), 138.9, 138.1, 135.0, 134.8, 133.5, 133.2, 132.4, 130.8, 130.7, 130.1, 126.0, 125.5, 124.3, 120.1 (t, *J* = 288.5 Hz), 117.1, 115.9, 64.4, 53.6, 22.7, 21.3, 14.0.

**<sup>19</sup>F NMR (565 MHz, CDCl<sub>3</sub>)**: δ -80.4, -80.5.

**IR (neat)**: 2985, 2365, 2255, 1760, 1473, 1293, 1102, 1010, 972, 822, 718.

**HRMS (ESI-TOF)**: calculated for [C<sub>12</sub>H<sub>10</sub>ClF<sub>2</sub>O<sub>2</sub>NSNa (M + Na<sup>+</sup>)]: 327.9981, found: 327.9984.

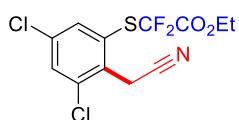

**2r**

**ethyl 2-((3,5-dichloro-2-(cyanomethyl)phenyl)thio)-2,2-difluoroacetate (2r)**

Following the procedure of **2k**, the title compound was obtained as colorless oil 42 mg, 25% yield. (R<sub>f</sub> = 0.33, eluent: PE/EtOAc = 10/1)

**<sup>1</sup>H NMR (400 MHz, CDCl<sub>3</sub>)**: δ 7.68 (d, *J* = 2.0 Hz, 1H), 7.63 (d, *J* = 2.1 Hz, 1H), 4.36 (q, *J* = 7.1 Hz, 2H), 4.14 (s, 2H), 1.36 (t, *J* = 7.1 Hz, 3H).

**<sup>13</sup>C NMR (101 MHz, CDCl<sub>3</sub>)**: δ 160.8 (t, *J* = 31.1 Hz), 137.6, 136.7, 135.4, 133.5, 133.0, 128.1, 119.8 (t, *J* = 294.0 Hz), 115.5, 64.6, 21.0, 14.0.

**<sup>19</sup>F NMR (565 MHz, CDCl<sub>3</sub>)**: δ -80.0.

**IR (neat)**: 3067, 2984, 2339, 1759, 1566, 1137, 1009, 854, 799, 666.

**HRMS (ESI-TOF)**: calculated for [C<sub>12</sub>H<sub>9</sub>Cl<sub>2</sub>F<sub>2</sub>NO<sub>2</sub>Na (M + Na<sup>+</sup>)]: 361.9591, found: 361.9594.

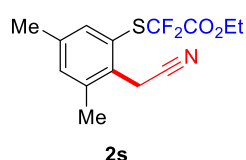

**ethyl 2-((2-cyanomethyl)-3,5-dimethylphenylthio)-2,2-difluoroacetate (2s)**

Following the procedure of **2k**, the title compound was obtained as colorless oil, 135 mg, 90% yield. ( $R_f = 0.25$ , eluent: PE/EtOAc = 10/1)

**$^1\text{H}$  NMR (400 MHz,  $\text{CDCl}_3$ ):**  $\delta$  7.40 (s, 1H), 7.19 (s, 1H), 4.30 (q,  $J = 7.2$  Hz, 2H), 4.04 (s, 2H), 2.46 (s, 3H), 2.33 (s, 3H), 1.31 (t,  $J = 7.2$  Hz, 3H).

**$^{13}\text{C}$  NMR (151 MHz,  $\text{CDCl}_3$ ):**  $\delta$  161.4 (t,  $J = 31.7$  Hz), 139.1, 138.7, 137.8, 135.0, 132.0, 124.4, 120.1 (t,  $J = 288.8$  Hz), 117.0, 64.0, 20.8, 20.6, 19.8, 13.9.

**$^{19}\text{F}$  NMR (565 MHz,  $\text{CDCl}_3$ ):**  $\delta$  -81.3.

**IR (neat):** 2983, 2252, 1761, 1604, 1470, 1288, 1098, 975, 861, 723, 708.

**HRMS (ESI-TOF):** calculated for  $[\text{C}_{14}\text{H}_{15}\text{F}_2\text{NO}_2\text{SNa} (\text{M} + \text{Na}^+)]$ : 322.0684, found: 322.0684.

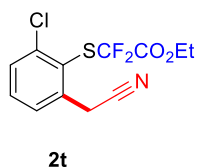

**ethyl 2-((2-chloro-6-(cyanomethyl)phenylthio)-2,2-difluoroacetate (2t)**

Following the procedure of **2k**, the title compound was obtained as colorless oil, 43 mg, 28% yield. ( $R_f = 0.33$ , eluent: PE/EtOAc = 5/1)

**$^1\text{H}$  NMR (400 MHz,  $\text{CDCl}_3$ ):**  $\delta$  7.63 – 7.59 (m, 1H), 7.56 (dd,  $J = 8.1, 1.4$  Hz, 1H), 7.50 – 7.46 (m, 1H), 4.32 (q,  $J = 7.2$  Hz, 2H), 4.16 (s, 2H), 1.33 (t,  $J = 7.2$  Hz, 3H).

**$^{13}\text{C}$  NMR (151 MHz,  $\text{CDCl}_3$ ):**  $\delta$  161.0 (t,  $J = 31.6$  Hz), 143.7, 139.8, 133.0, 130.6, 128.1, 123.7, 119.8 (t,  $J = 290.9$  Hz), 117.3, 64.3, 24.4, 13.9.

**$^{19}\text{F}$  NMR (565 MHz,  $\text{CDCl}_3$ ):**  $\delta$  -80.6.

**IR (neat):** 2924, 2360, 1761, 1574, 1452, 1165, 1134, 968, 783, 759.

**HRMS (ESI-TOF):** calculated for  $[\text{C}_{12}\text{H}_{10}\text{ClF}_2\text{O}_2\text{NSNa} (\text{M} + \text{Na}^+)]$ : 327.9981, found: 327.9984.

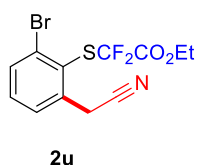

**ethyl 2-((2-bromo-6-(cyanomethyl)phenylthio)-2,2-difluoroacetate (2u)**

Following the procedure of **2k**, the title compound was obtained as colorless oil, 52 mg, 30% yield. ( $R_f = 0.28$ , eluent: PE/EtOAc = 10/1)

**$^1\text{H}$  NMR (600 MHz,  $\text{CDCl}_3$ ):**  $\delta$  7.76 – 7.73 (m, 1H), 7.64 (dd,  $J = 7.7, 0.5$  Hz, 1H), 7.41 – 7.38 (m, 1H), 4.33 (q,  $J = 7.2$  Hz, 2H), 4.18 (s, 2H), 1.33 (t,  $J = 7.2$  Hz, 3H).

**$^{13}\text{C}$  NMR (101 MHz,  $\text{CDCl}_3$ ):**  $\delta$  160.9 (t,  $J = 31.6$  Hz), 139.8, 135.1, 134.1, 133.2, 128.8, 125.7, 119.8 (t,  $J = 291.6$  Hz), 117.3, 64.4, 24.9, 13.9.



**<sup>19</sup>F NMR (377 MHz, CDCl<sub>3</sub>):** δ -80.4

**IR (neat):** 2923, 2358, 2262, 1761, 1444, 1299, 1129, 970, 780, 725.

**HRMS (ESI-TOF):** calculated for [C<sub>12</sub>H<sub>10</sub>BrF<sub>2</sub>O<sub>2</sub>NSNa (M + Na<sup>+</sup>): 371.9476, found: 371.9474.

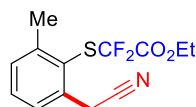

**2v**

**ethyl 2-((2-(cyanomethyl)-6-methylphenyl)thio)-2,2-difluoroacetate (2v)**

Following the procedure of **2k**, the title compound was obtained as colorless oil, 47 mg, 33% yield. (R<sub>f</sub> = 0.37, eluent: PE/EtOAc = 10/1)

**<sup>1</sup>H NMR (600 MHz, CDCl<sub>3</sub>):** δ 7.50 (d, *J* = 7.6 Hz, 1H), 7.43 – 7.41 (m, 1H), 7.34 (d, *J* = 7.6 Hz, 1H), 4.27 (q, *J* = 7.2 Hz, 2H), 4.11 (s, 2H), 2.57 (s, 3H), 1.30 (t, *J* = 7.2 Hz, 3H).

**<sup>13</sup>C NMR (101 MHz, CDCl<sub>3</sub>):** δ 161.3 (t, *J* = 31.2 Hz), 147.1, 137.7, 131.8, 131.1, 127.3, 123.4, 120.8 (t, *J* = 289.0 Hz), 117.9, 64.1, 23.9, 22.4, 13.9.

**<sup>19</sup>F NMR (377 MHz, CDCl<sub>3</sub>):** δ -79.7.

**IR (neat):** 2929, 2247, 1760, 1462, 1297, 1091, 968, 854, 769, 711.

**HRMS (ESI-TOF):** calculated for [C<sub>13</sub>H<sub>13</sub>F<sub>2</sub>O<sub>2</sub>NSNa (M + Na<sup>+</sup>): 308.0527, found: 308.0528.

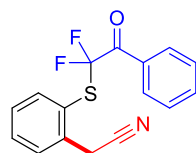

**2w**

**2-(2-((1,1-difluoro-2-oxo-2-phenylethyl)thio)phenyl)acetonitrile (2w)**

Following the procedure of **2k**, the title compound was obtained as colorless oil, 88 mg, 58% yield. (R<sub>f</sub> = 0.31, eluent: PE/EtOAc = 10/1)

**<sup>1</sup>H NMR (400 MHz, CDCl<sub>3</sub>):** δ 8.14 – 8.07 (m, 2H), 7.72 – 7.64 (m, 3H), 7.58 – 7.49 (m, 3H), 7.41 – 7.37 (m, 1H), 4.04 (s, 2H).

**<sup>13</sup>C NMR (151 MHz, CDCl<sub>3</sub>):** δ 185.0 (t, *J* = 28.2 Hz), 139.6, 136.5, 135.2, 132.1, 130.8, 130.5, 129.8, 129.3, 129.0, 124.5 (t, *J* = 292.3 Hz), 124.1, 117.6, 23.1.

**<sup>19</sup>F NMR (565 MHz, CDCl<sub>3</sub>):** δ -75.4.

**IR (neat):** 2982, 2250, 1700, 1596, 1449, 1241, 1073, 987, 823, 757.

**HRMS (ESI-TOF):** calculated for [C<sub>16</sub>H<sub>11</sub>F<sub>2</sub>NOSNa (M + Na<sup>+</sup>): 326.0422, found: 326.0422.

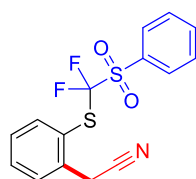

**2x**

**2-(2-((difluoro(phenylsulfonyl)methyl)thio)phenyl)acetonitrile (2x)**

Following the general procedure, using DCM/MeCN (volume ratio: 2:1) as solvent, T<sup>1</sup> (room temperature), t<sup>1</sup>(5 h). the title compound was obtained as colorless oil, 139 mg, 82% yield. (R<sub>f</sub> = 0.2, eluent: PE/EtOAc = 5/1)

**<sup>1</sup>H NMR (400 MHz, CDCl<sub>3</sub>):** δ 7.99 – 7.93 (m, 2H), 7.81 – 7.75 (m, 2H), 7.68 – 7.54 (m, 4H), 7.42 – 7.38 (m, 1H), 4.14 (s, 2H).

**<sup>13</sup>C NMR (101 MHz, CDCl<sub>3</sub>):** δ 139.9, 137.0, 136.0, 132.6, 132.0, 131.0, 129.9, 129.7, 129.4, 128.1 (t, *J* = 325.9 Hz), 122.8 (t, *J* = 3.2 Hz), 117.5, 23.2.

**<sup>19</sup>F NMR (377 MHz, CDCl<sub>3</sub>):** δ -78.0.

**IR (neat):** 3066, 2359, 2252, 1582, 1448, 1348, 1169, 903, 725, 682, 577.

**HRMS (ESI-TOF):** calculated for [C<sub>15</sub>H<sub>11</sub>F<sub>2</sub>NO<sub>2</sub>S<sub>2</sub>Na (M + Na<sup>+</sup>):362.0091, found: 362.0094.

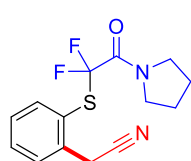

**2y**

**2-(2-((1,1-difluoro-2-oxo-2-(pyrrolidin-1-yl)ethyl)thio)phenyl)acetonitrile (2y)**

Following the procedure of **2k**, the title compound was obtained as colorless oil, 120 mg, 81% yield. (*R*<sub>f</sub> = 0.2, eluent: PE/EtOAc = 5/1)

**<sup>1</sup>H NMR (600 MHz, CDCl<sub>3</sub>):** δ 7.72 – 7.69 (m, 1H), 7.65 (dd, *J* = 7.7, 0.5 Hz, 1H), 7.55 – 7.52 (m, 1H), 7.40 – 7.37 (m, 1H), 4.09 (s, 2H), 3.64 (t, *J* = 6.8 Hz, 2H), 3.54 (t, *J* = 7.0 Hz, 2H), 1.98 – 1.94 (m, 2H), 1.90 – 1.85 (m, 2H).

**<sup>13</sup>C NMR (151 MHz, CDCl<sub>3</sub>):** δ 159.4 (t, *J* = 28.1 Hz), 139.7, 136.7, 131.9, 129.6, 129.0, 124.8, 124.6 (t, *J* = 290.5 Hz), 117.8, 47.9, 46.8, 26.5, 23.5, 23.1.

**<sup>19</sup>F NMR (565 MHz, CDCl<sub>3</sub>):** δ -76.5.

**IR (neat):** 2979, 2252, 1661, 1461, 1342, 1131, 904, 722, 647, 545.

**HRMS (ESI-TOF):** calculated for [C<sub>14</sub>H<sub>14</sub>F<sub>2</sub>N<sub>2</sub>OSNa (M + Na<sup>+</sup>):319.0687, found: 319.0688.

#### 4 Gram-Scale reaction and elaboration of product 2c

##### Gram-Scale reaction

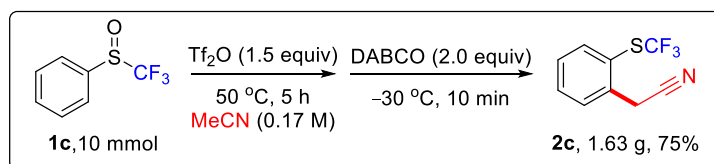

To a mixture of aryl trifluoromethyl sulfoxide (**1c**, 10.0 mmol) in acetonitrile (60 mL) was added Tf<sub>2</sub>O (2.5 mL, 15 mmol) at 50 °C. After stirring for 5 h, DABCO (2.2 g, 20 mmol) was added to the mixture under the same temperature. The mixture was then stirred for another

10 min. After that, the mixture was passed through a short silica gel column and concentrated under vacuum. The resulting residue was further purified by silica gel column chromatography to give compounds **2c** in 75% yield (1.63 g) as colorless oil.

### Elaboration of product **2c**:

#### 2-((trifluoromethyl)thio)phenylacetamide (**3**)

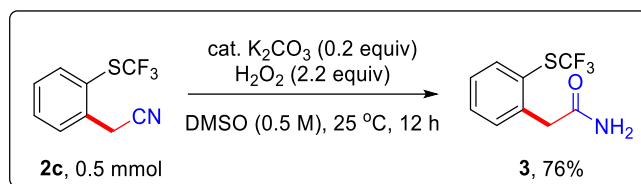

To a solution of **2c** (109 mg, 0.5 mmol) in DMSO (1 mL) were sequentially added  $H_2O_2$  (30% aq., 140  $\mu$ L) and  $K_2CO_3$  (14 mg, 0.1 mmol) at 25 °C. After stirring for 12 h, the mixture was diluted with  $H_2O$ , extracted with DCM and dried with  $Na_2SO_4$ . Then the mixture was filtered and concentrated under vacuum. The resulting residue was further purified by column chromatography on silica gel to afford compound **3** in 76% yield (89 mg) as white solid, m.p. 83-84 °C ( $R_f$  = 0.19, eluent: PE/EtOAc = 1/1)

$^1H$  NMR (600 MHz,  $CDCl_3$ ):  $\delta$  7.74 (d,  $J$  = 7.8 Hz, 1H), 7.50 – 7.48 (m, 1H), 7.45 (dd,  $J$  = 7.6, 1.4 Hz, 1H), 7.37 – 7.35 (m, 1H), 5.97 (brs, 1H), 5.50 (brs, 1H), 3.88 (s, 2H).

$^{13}C$  NMR (151 MHz,  $CDCl_3$ ):  $\delta$  172.5, 140.5, 138.7, 132.0, 131.7, 129.5 (q,  $J$  = 308.8 Hz), 128.8, 124.7, 41.5.

$^{19}F$  NMR (377 MHz,  $CDCl_3$ ):  $\delta$  -42.4.

IR (neat): 3392, 3200, 2933, 1660, 1288, 1143, 1058, 935, 762, 594.

HRMS (ESI-TOF): calculated for  $[C_9H_8F_3NOSNa (M + Na^+)]$ : 258.0171, found: 258.0173.

#### 1-(2-((trifluoromethyl)thio)phenyl)pent-4-en-2-one (**4**)

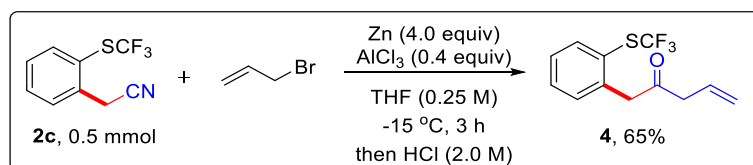

To a mixture of **2c** (109 mg, 0.5 mmol), allyl bromide (91 mg, 0.75 mmol) and Zn (powder, 131 mg, 2.0 mmol) in THF (2.0 mL) was added anhydrous  $AlCl_3$  (27 mg, 0.2 mmol) at –

15 °C under N<sub>2</sub> atmosphere. The mixture was stirred for 3 h at the same temperature. Then to the mixture was added HCl (1.0 M, 5 mL) dropwise. After stirring for another 30 min, the mixture was neutralized with NaHCO<sub>3</sub> (sat.), extracted with DCM. The organic layer was separated, dried over Na<sub>2</sub>SO<sub>4</sub>, and concentrated. The resulting residue was further purified by column chromatography on silica gel to afford compound **4** in 65% (85 mg) as colorless oil. (R<sub>f</sub> = 0.58, eluent: Petroleum ether /EtOAc = 5/1).

**<sup>1</sup>H NMR (400 MHz, CDCl<sub>3</sub>):** δ 7.74 (d, *J* = 7.8 Hz, 1H), 7.48 – 7.44 (m, 1H), 7.37 – 7.33 (m, 1H), 7.28 (dd, *J* = 7.7, 1.4 Hz, 1H), 6.01 – 5.91 (m, 1H), 5.26 – 5.17 (m, 2H), 4.09 (s, 2H), 3.31 – 3.29 (m, 2H).

**<sup>13</sup>C NMR (101 MHz, CDCl<sub>3</sub>):** δ 204.8, 140.1, 138.5, 131.8, 131.7, 130.2, 128.5, 129.6 (q, *J* = 309.8 Hz), 124.7, 119.5, 47.74, 47.73.

**<sup>19</sup>F NMR (377 MHz, CDCl<sub>3</sub>):** δ -42.6.

**IR (neat):** 3420, 2929, 2362, 1720, 1475, 1109, 1056, 923, 759, 476.

**HRMS (ESI-TOF):** calculated for [C<sub>12</sub>H<sub>11</sub>F<sub>3</sub>OSNa (M + Na<sup>+</sup>): 283.0375, found: 283.0381.

#### 2-(2-((trifluoromethyl)thio)phenyl)pent-4-enitrile (**5**)

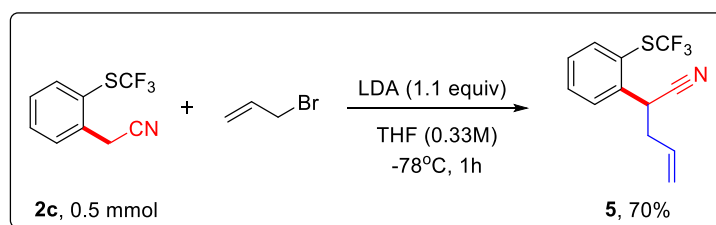

To the solution of (*i*-pr)<sub>2</sub>NH (84 μL, 0.6 mmol) in THF (1.5 mL) was added *n*-BuLi (1.6 M, 0.37 mL) slowly at -78 °C. After stirring for 10 min, **2c** (109 mg, 0.5 mmol) was added dropwise to the mixture at -78 °C. After 5 min, allyl bromide ( 50 μL, 0.6 mmol ) was added. After stirring for 1 h, the mixture was quenched with NH<sub>4</sub>Cl (sat.), extracted with DCM. The organic layer was separated, dried over Na<sub>2</sub>SO<sub>4</sub>, and concentrated. The resulting residue was further purified by column chromatography on silica gel to afford compound **5** in 70% (90 mg) as colorless oil. (R<sub>f</sub> = 0.41, eluent: Petroleum ether /EtOAc = 10/1).

**<sup>1</sup>H NMR (600 MHz, CDCl<sub>3</sub>):** δ 7.76 (d, *J* = 7.8 Hz, 1H), 7.68 (dd, *J* = 7.8, 1.3 Hz, 1H), 7.60 – 7.58 (m, 1H), 7.43 – 7.41 (m, 1H), 7.86 – 7.79 (m, 1H), 5.24 – 5.16 (m, 2H), 4.68 (dd, *J* = 8.6, 5.9 Hz, 1H), 2.66 – 2.54 (m, 2H).

**<sup>13</sup>C NMR (151 MHz, CDCl<sub>3</sub>):** δ 141.1, 139.1, 132.6, 132.1, 129.5, 129.3, 129.1 (q, *J* = 309.9 Hz), 122.9, 120.11, 120.08, 39.6, 35.3.

**<sup>19</sup>F NMR (565 MHz, CDCl<sub>3</sub>):** δ -42.3.

**IR (neat):** 2923, 2852, 2243, 1644, 1472, 1106, 1055, 761, 649, 499.

**HRMS (ESI-TOF):** calculated for [C<sub>12</sub>H<sub>10</sub>F<sub>3</sub>NSNa (M + Na<sup>+</sup>):280.0378, found: 280.0378.

### 2-(2-((trifluoromethyl)sulfinyl)phenyl)acetonitrile (**6**)

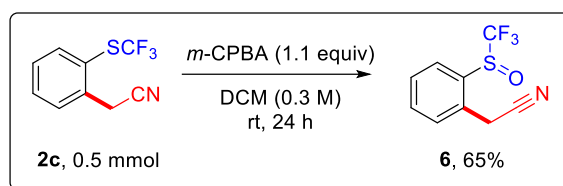

To a solution of **2c** (109 mg, 0.5 mmol) in DCM (0.3 M) was added *m*-CPBA (112 mg, 0.55 mmol). The resulting solution was stirred at room temperature for 24 h. After completion of the reaction, saturated aqueous NaHCO<sub>3</sub> was added to the reaction mixture and the resulting solution was extracted with DCM. The combined organic layer was dried over Na<sub>2</sub>SO<sub>4</sub> and concentrated under reduced pressure. The resulting residue was further purified by column chromatography on silica gel to afford compound **6** in 65% (76 mg) as colorless oil. (*R*<sub>f</sub> = 0.15, eluent: Petroleum ether /EtOAc = 5/1).

**<sup>1</sup>H NMR (400 MHz, CDCl<sub>3</sub>):** δ 7.97 (d, *J* = 7.8 Hz, 1H), 7.73 – 7.69 (m, 2H), 7.67 – 7.61 (m, 1H), 4.05 (d, *J* = 3.3 Hz, 2H).

**<sup>13</sup>C NMR (101 MHz, CDCl<sub>3</sub>):** δ 134.4, 133.6, 130.8, 130.7, 129.7, 127.7, 125.1 (q, *J* = 336.5 Hz), 116.2, 20.2.

**<sup>19</sup>F NMR (377 MHz, CDCl<sub>3</sub>):** δ -72.8.

**IR (neat):** 2254, 1476, 1187, 1077, 905, 726, 648, 575, 458, 436.

**HRMS (ESI-TOF):** calculated for [C<sub>9</sub>H<sub>6</sub>F<sub>3</sub>NOSNa (M + Na<sup>+</sup>):256.0014, found: 256.0013.

## 5 NMR spectra

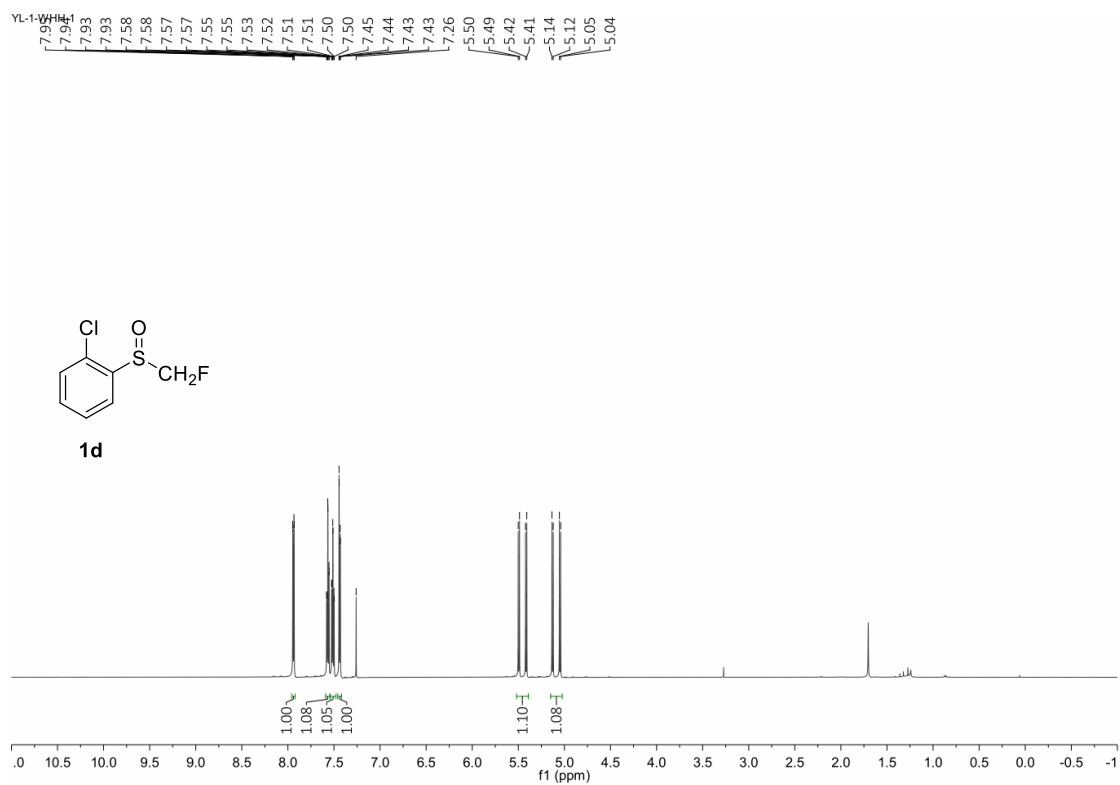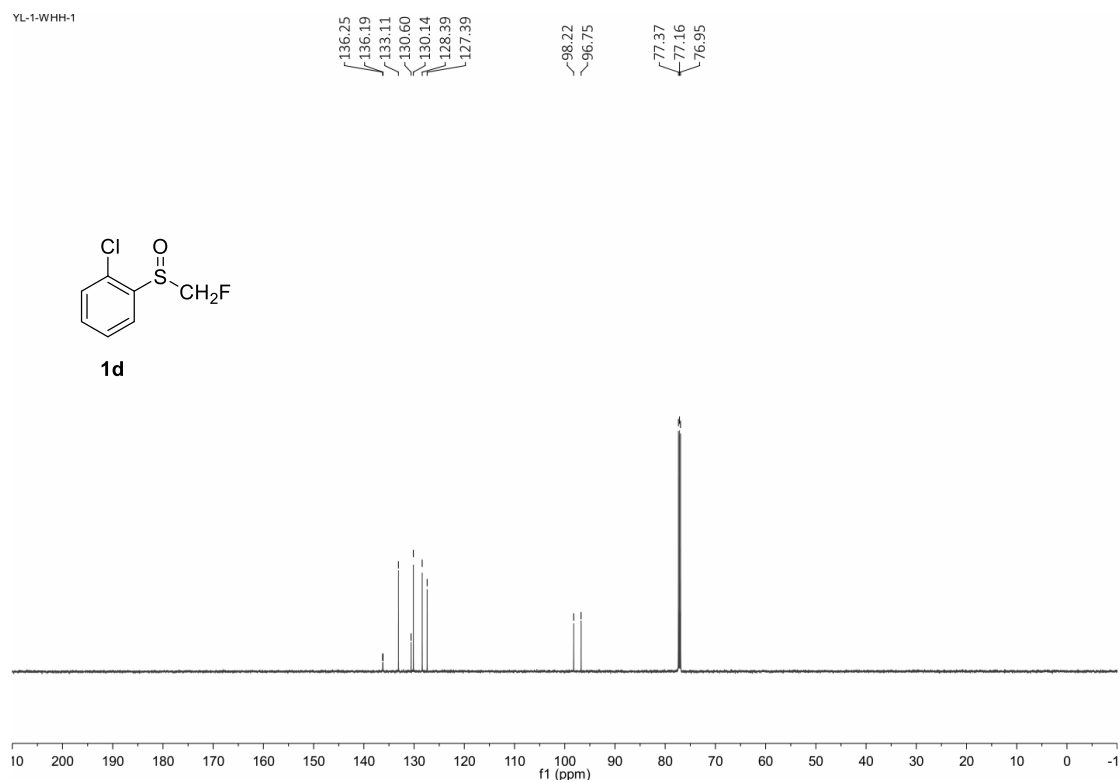

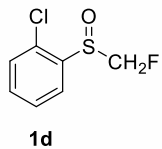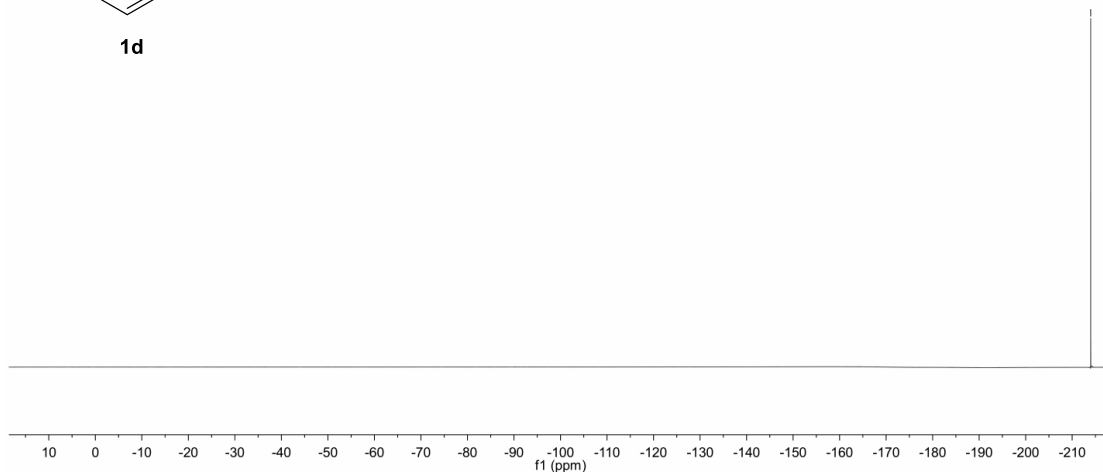

YL-2-WHH

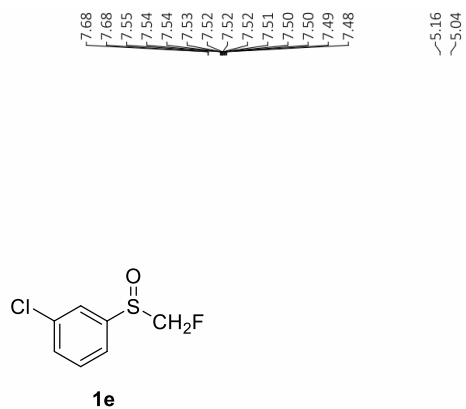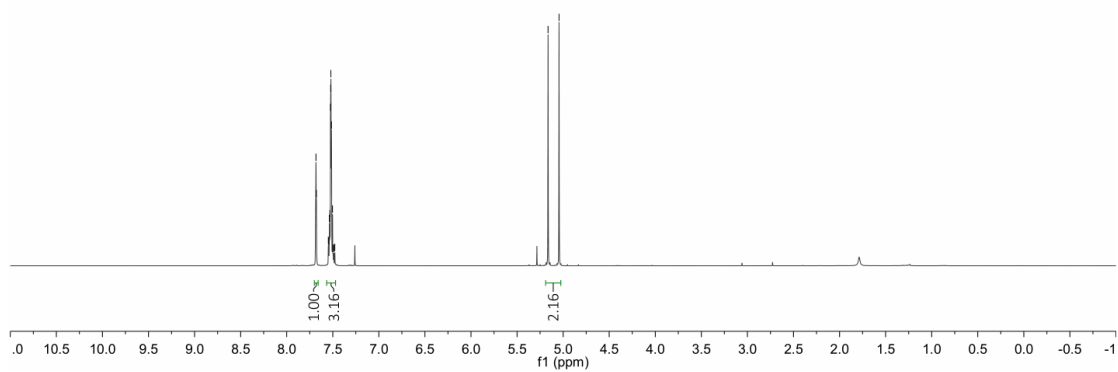

YL-2-WHH

140.96  
140.91  
136.17  
132.38  
130.87  
124.83  
122.88  
99.04  
96.83  
77.48  
77.16  
76.84

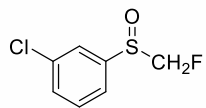

1e

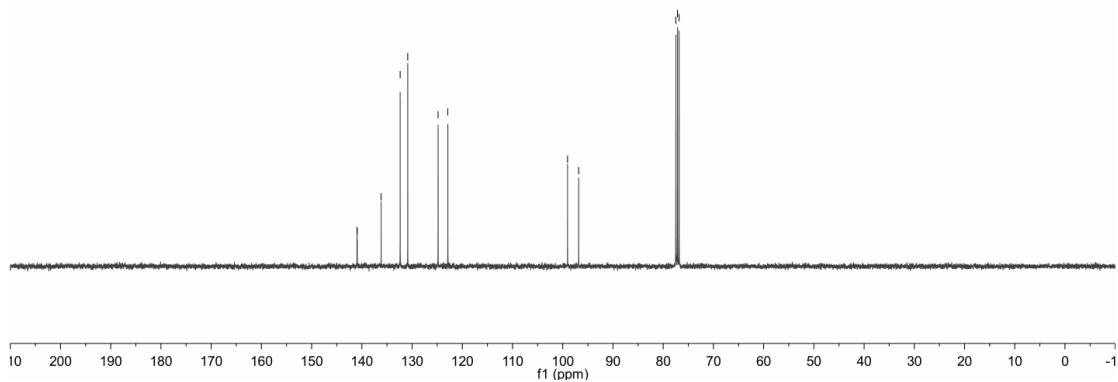

YL-2-WHH

212.56

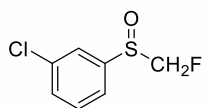

1e

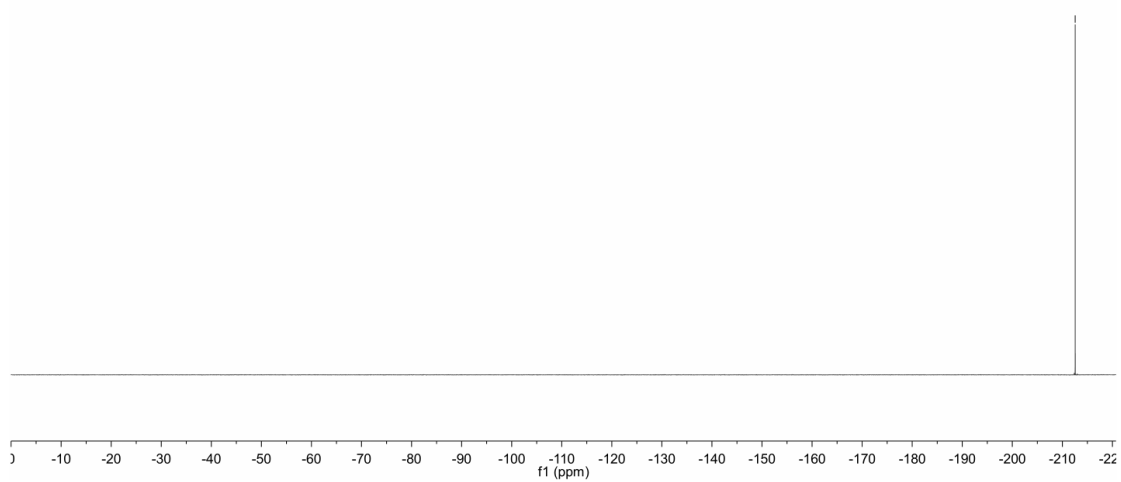



WHH-YL-12 1j

7.81  
7.80  
7.70  
7.69  
7.69  
7.67  
7.64  
7.62  
7.61  
7.26

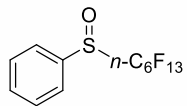

1j

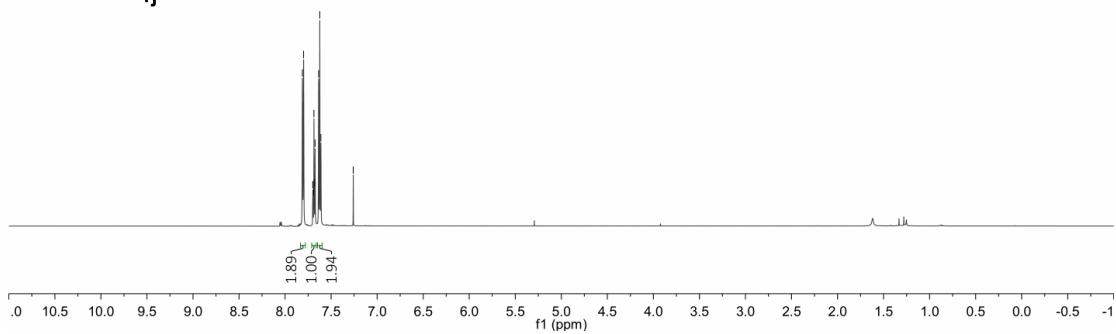

WHH-YL-12

135.15  
133.97  
131.25  
129.87  
129.64  
129.62  
129.61  
126.93  
117.25  
111.92  
110.92  
110.33

77.48  
77.16  
76.84

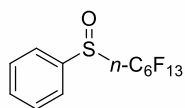

1j

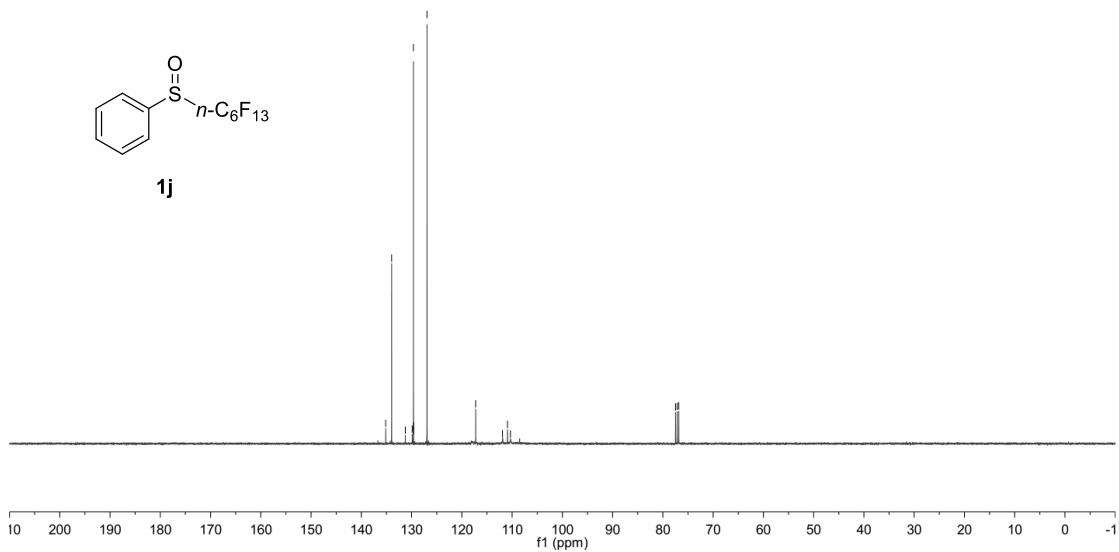

wth-y-12

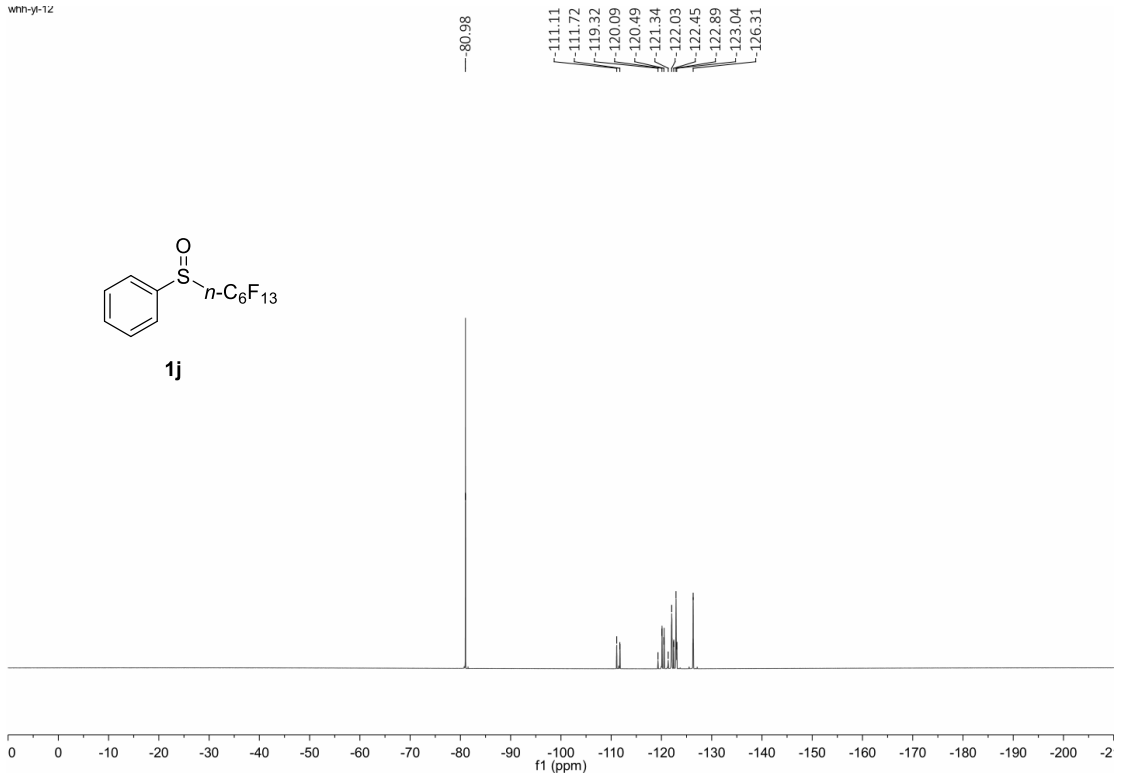

WHH-YL-3

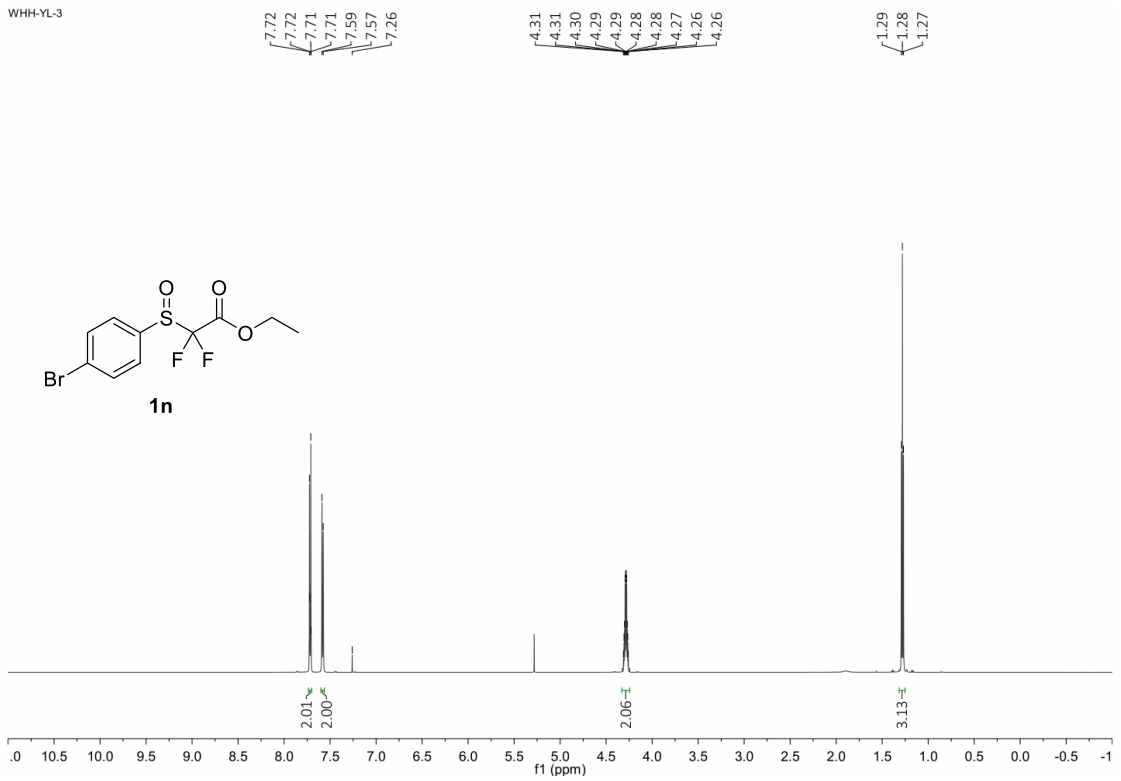

WHH-YL-3

159.37  
159.19  
159.00

135.18  
132.75  
128.37  
127.59  
119.83  
117.83  
115.80

77.37  
77.16  
76.95  
64.47

13.94

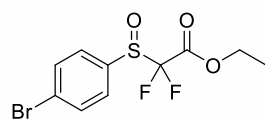

1n

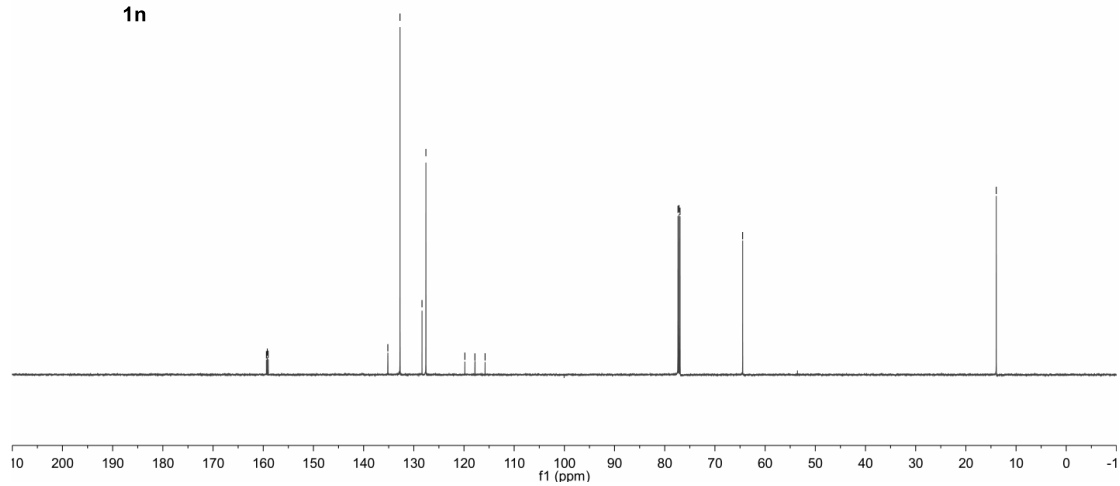

WHH-YL-3 1n

108.16  
108.56  
111.17  
111.58

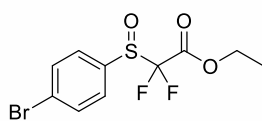

1n

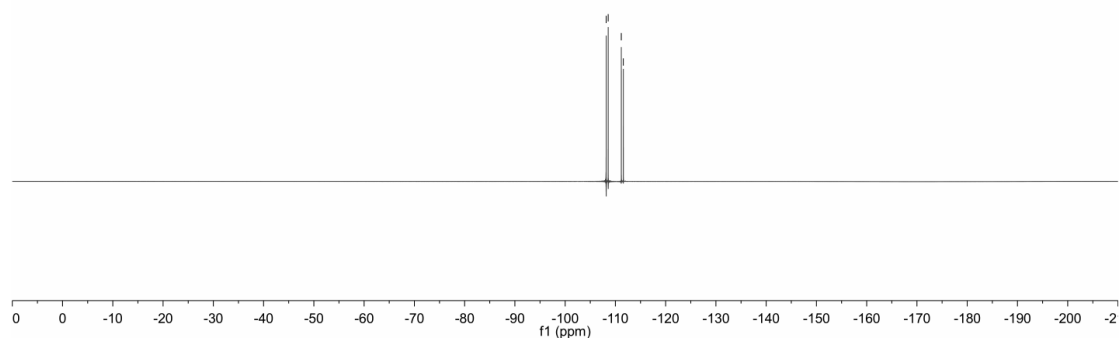

YL-4-WHH

7.90  
7.89  
7.88  
7.87  
7.84  
7.26  
4.36  
4.36  
4.34  
4.34  
4.33  
4.32  
4.31  
1.34  
1.32  
1.30

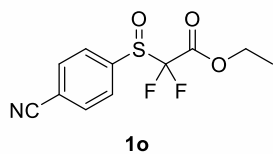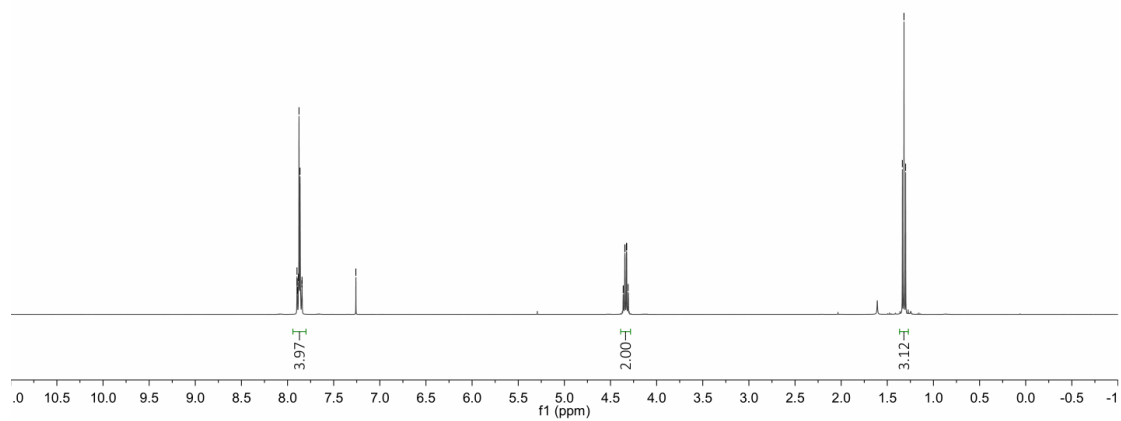

YL-4-WHH

159.12  
158.94  
158.75  
141.71  
132.96  
126.88  
120.02  
118.02  
117.98  
117.41  
117.04  
115.97  
77.37  
77.16  
76.95  
64.78  
14.04

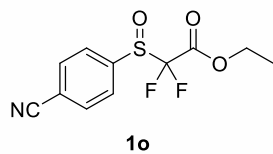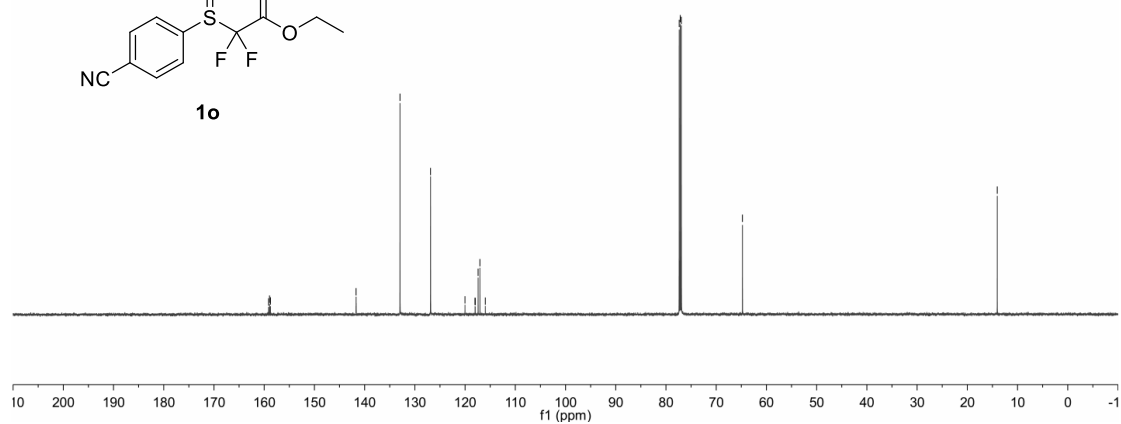

YL-4-WHH

106.37  
106.97  
110.28  
110.89

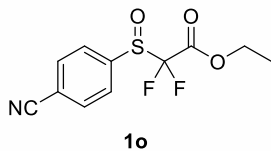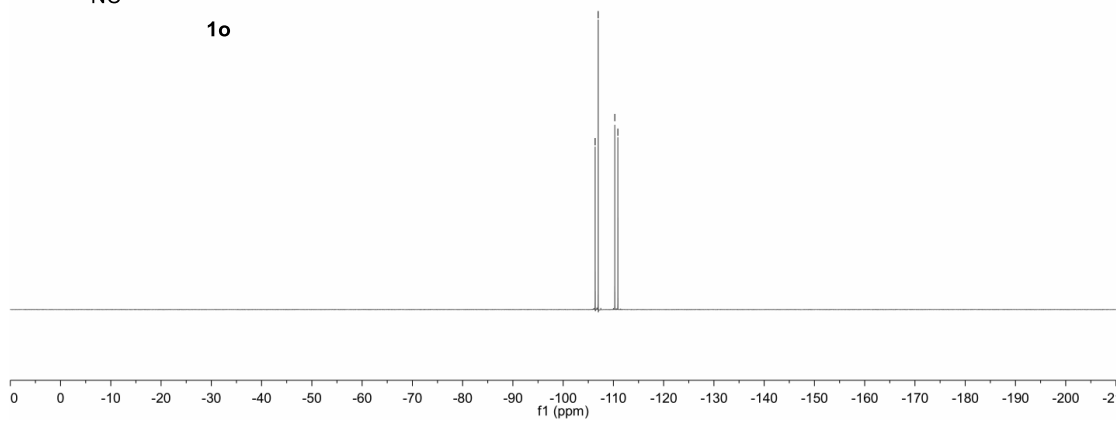

WHH-YL-5 1p

7.86  
7.75  
7.75  
7.75  
7.74  
7.74  
7.73  
7.73  
7.63  
7.61  
7.46  
7.45  
7.44  
7.26

4.31  
4.30  
4.29  
4.29  
4.28  
4.28  
4.27  
4.27

1.29  
1.28  
1.27

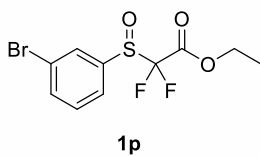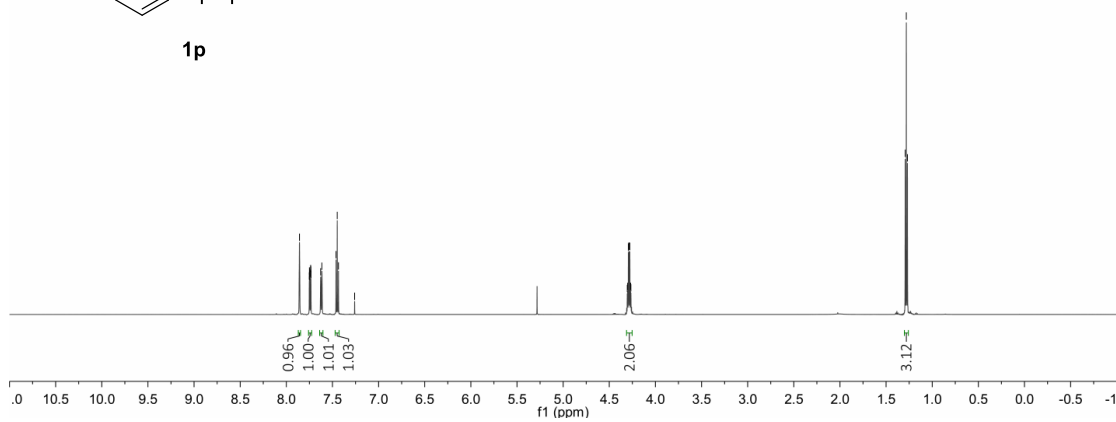

WHH-YL-5 1p

159.26  
159.07  
158.88  
138.33  
136.36  
130.88  
128.75  
124.72  
123.67  
120.05  
118.05  
116.03

77.37  
77.16  
76.95  
64.50

13.94

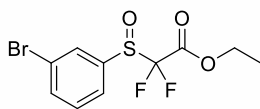

1p

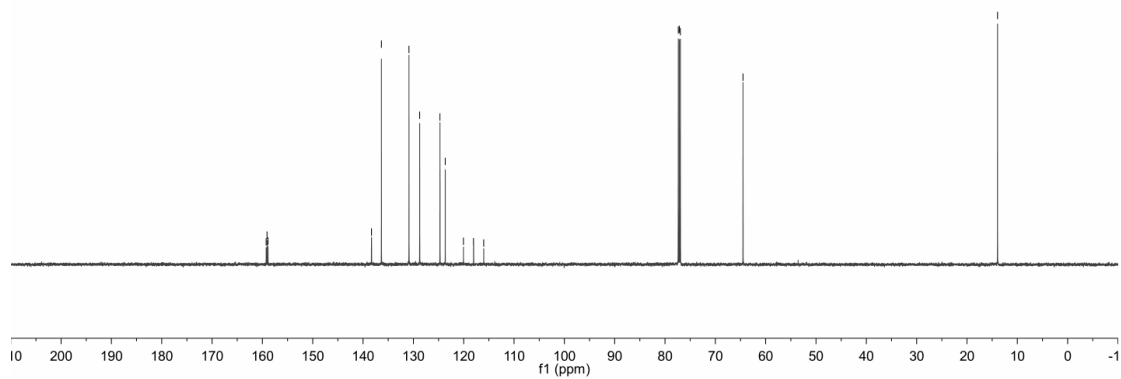

WHH-YL-5 1p

108.09  
108.49  
110.45  
110.86

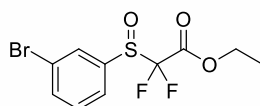

1p

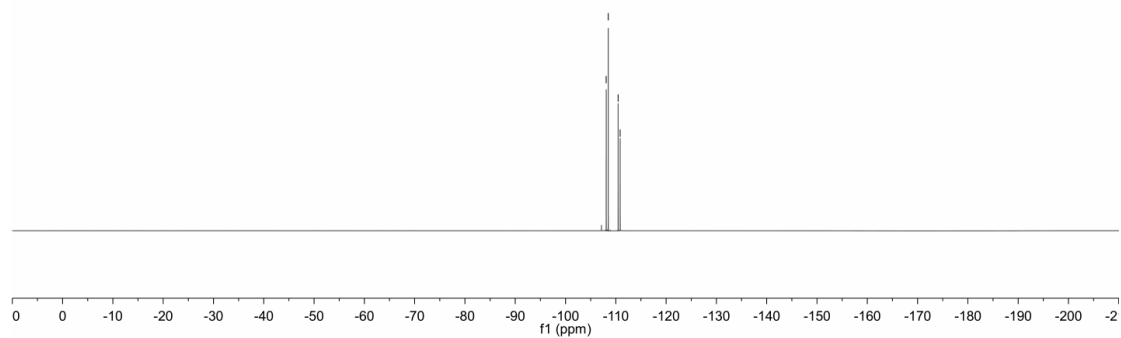

WHH-YL-6 1q

7.72  
7.60  
7.59  
7.58  
7.58  
7.57  
7.53  
7.52  
7.50  
7.26  
4.31  
4.30  
4.30  
4.29  
4.28  
4.28  
4.27  
4.27  
4.26  
1.29  
1.28  
1.27

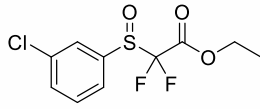

1q

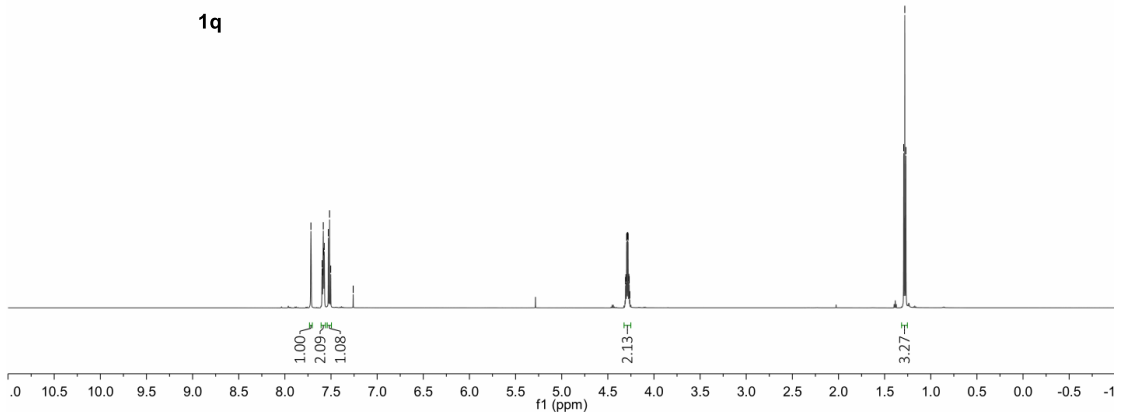

WHH-YL-6 1q

159.27  
159.09  
158.90  
138.19  
135.96  
133.46  
130.65  
125.96  
124.27  
120.03  
118.01  
116.01  
77.37  
77.16  
76.95  
64.50  
13.93

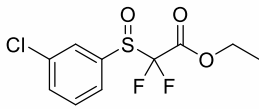

1q

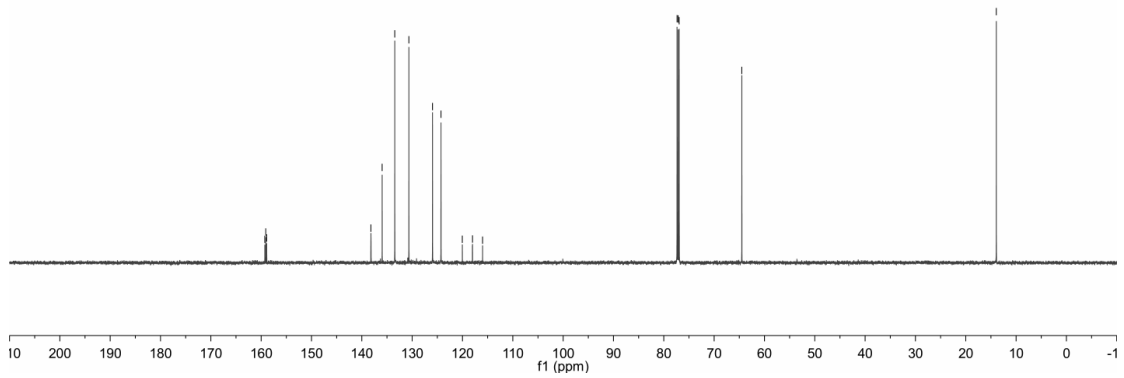

WHH-YL-6 1q

108.08  
108.49  
110.54  
110.95

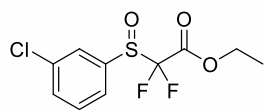

1q

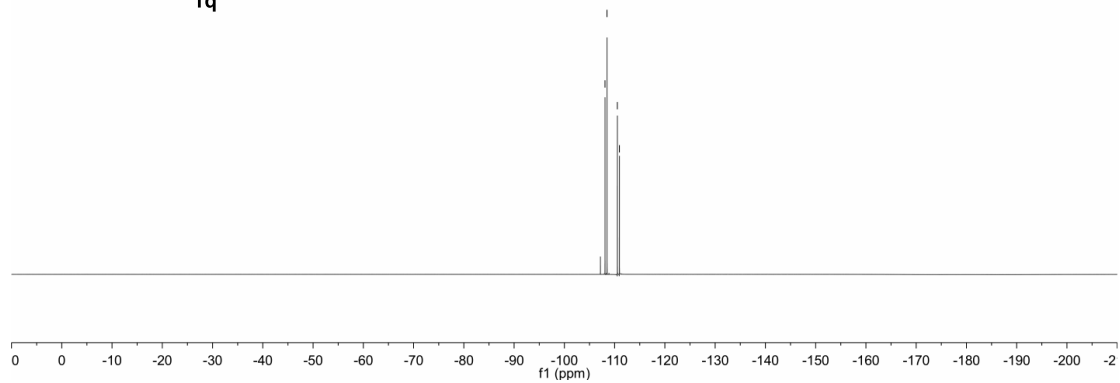

WHH-YL-7 1r

7.59  
7.59  
7.26

4.36  
4.34  
4.33  
4.32

1.33  
1.32  
1.31

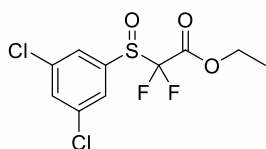

1r

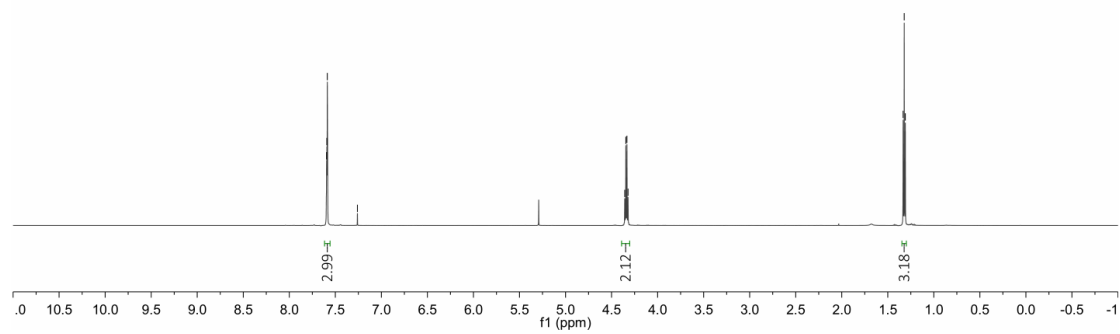



WHH-YL-7 1r

159.09  
158.91  
158.72

139.75  
136.59  
133.32

124.34  
120.01  
118.01  
115.97

77.37  
77.16  
76.95

64.74

14.00

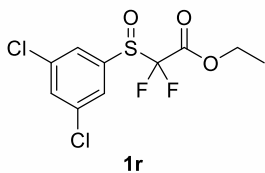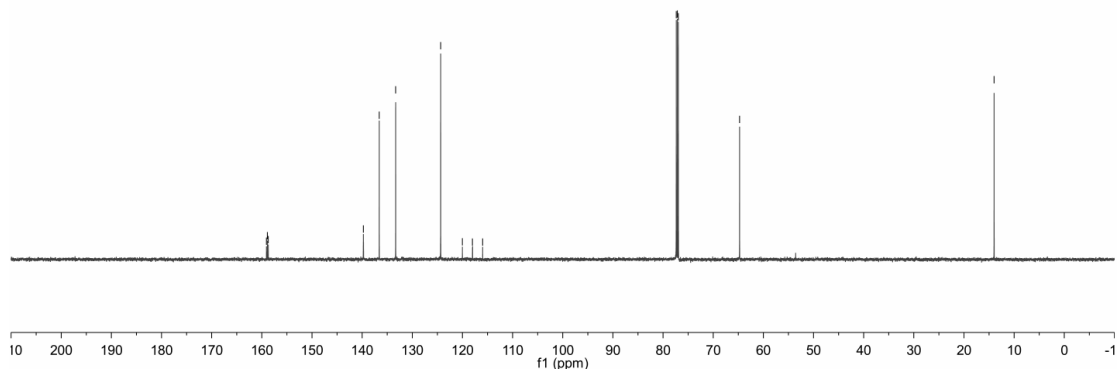

WHH-YL-7 1r

107.23  
107.63  
110.09  
110.50

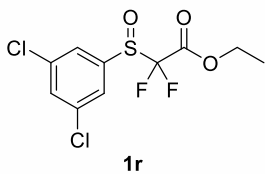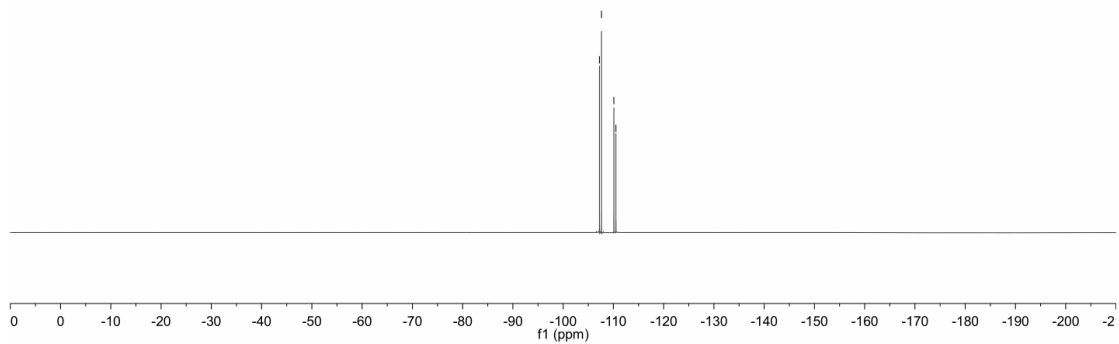

wth-yf-8

7.31  
7.26  
7.23  
7.22  
4.28  
4.27  
4.26  
4.26  
4.24  
4.24  
4.22  
4.22  
2.38  
2.38  
1.28  
1.26  
1.24

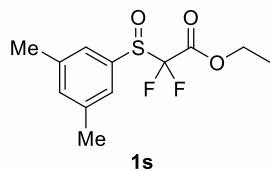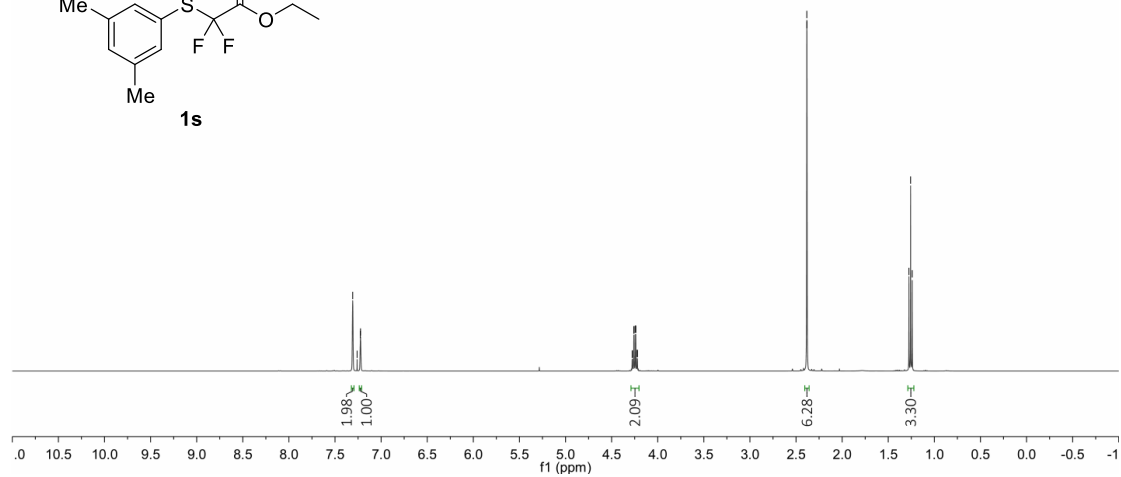

wth-yf-8

159.78  
159.49  
159.21  
139.52  
135.77  
135.13  
123.51  
121.11  
118.10  
115.10  
77.48  
77.16  
76.84  
64.11  
21.32  
13.88

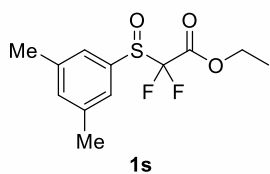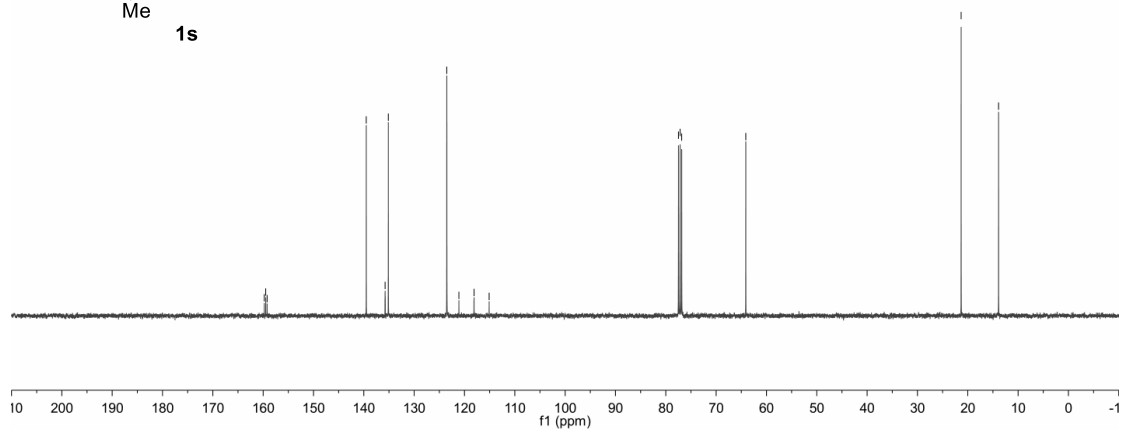

wbh-yl-8

-109.10  
-109.70  
-111.00  
-111.60

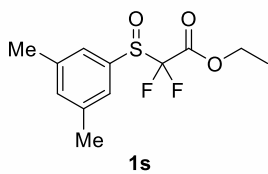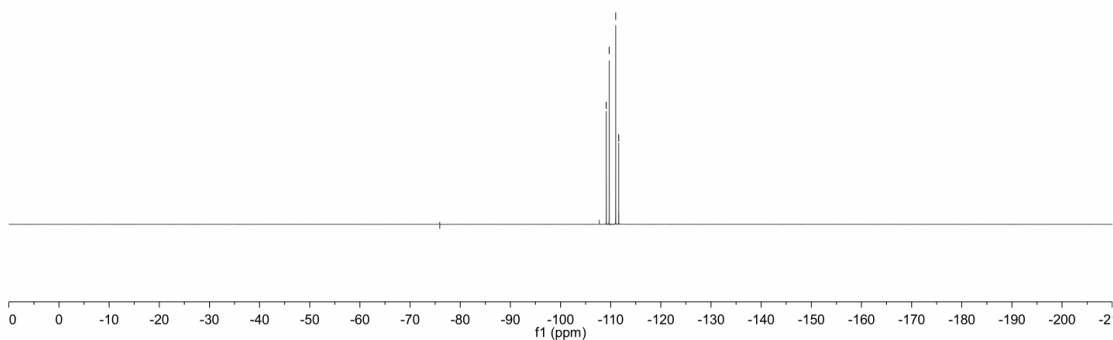

7.99  
7.97  
7.92  
7.91  
7.90  
7.57  
7.56  
7.55  
7.54  
7.54  
7.54  
7.53  
7.53  
7.47  
7.46  
7.46  
7.45  
7.45  
7.45  
7.44  
7.44  
7.26  
4.36  
4.35  
4.34  
4.34  
4.33  
4.33  
4.32  
4.32  
4.31  
4.30  
4.29  
4.29  
4.28  
4.28  
4.26

1.32  
1.31  
1.29

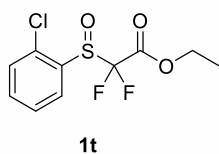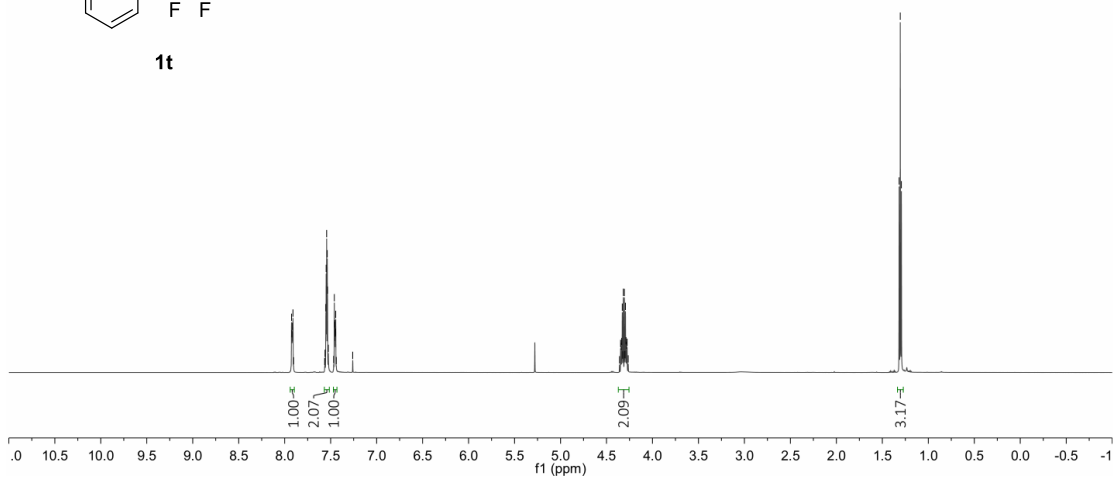

WHH-YL-9 1t

159.46  
159.27  
159.08

135.21  
134.26  
133.33  
130.24  
128.19  
127.91  
120.99  
118.97  
116.93

77.37  
77.16  
76.95

64.46

13.92

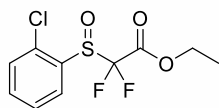

1t

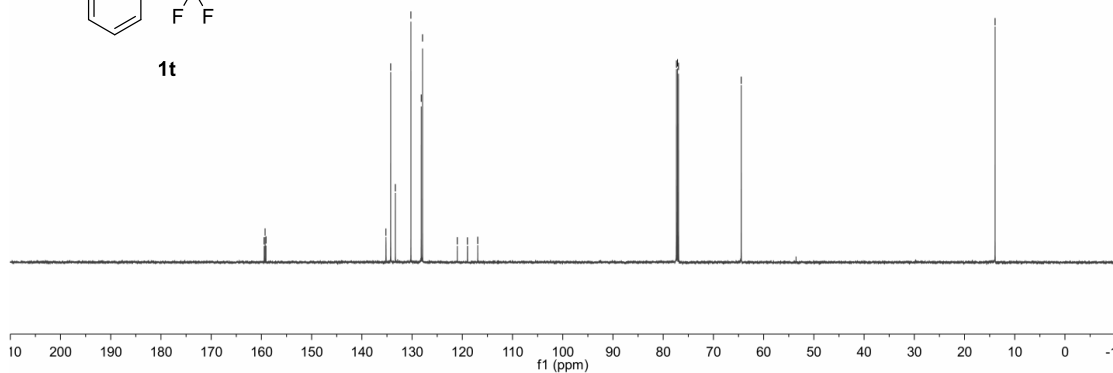

WHH-YL-9 1t

106.32  
106.71  
108.66  
109.05

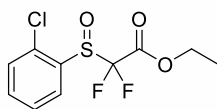

1t

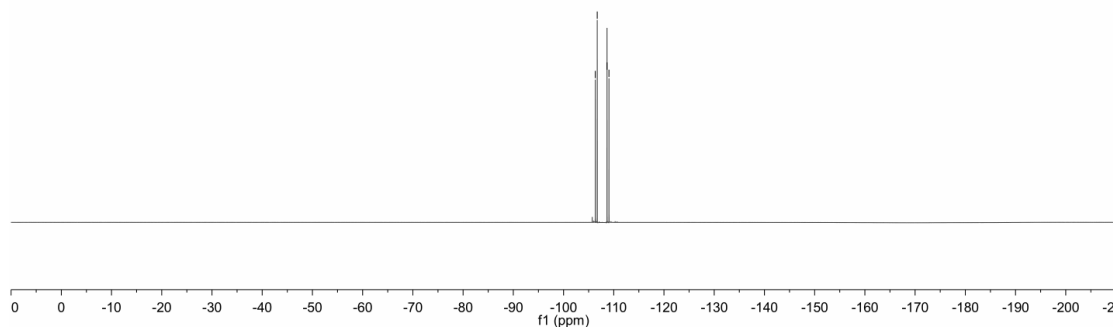

WHH-YL-10 1u

7.91  
7.90  
7.64  
7.63  
7.61  
7.60  
7.58  
7.50  
7.48  
7.47  
7.26

4.38  
4.37  
4.36  
4.35  
4.35  
4.34  
4.33  
4.32  
4.31  
4.30  
4.30  
4.29

1.34  
1.32  
1.31

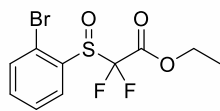

1u

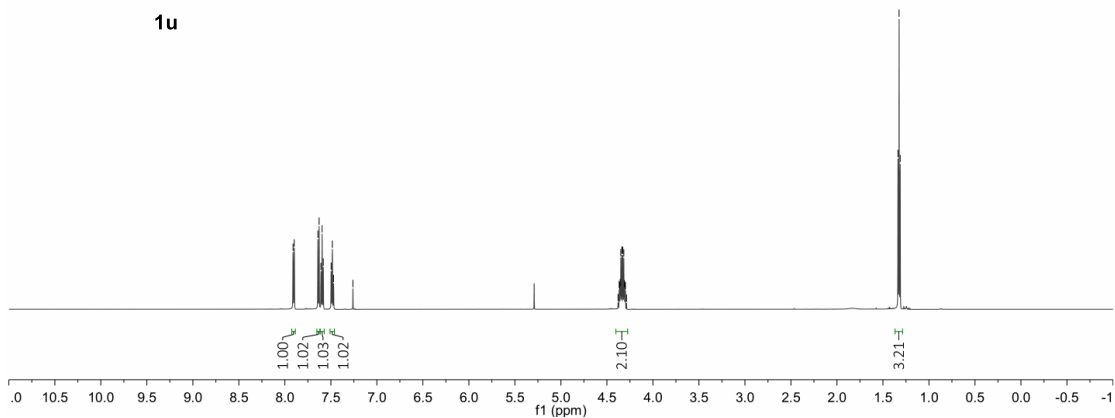

WHH-YL-10 1u

159.56  
159.37  
159.19  
137.18  
134.49  
133.47  
128.76  
128.45  
121.80  
121.19  
119.17  
117.42

77.37  
77.16  
76.95  
64.50

13.99

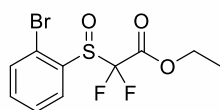

1u

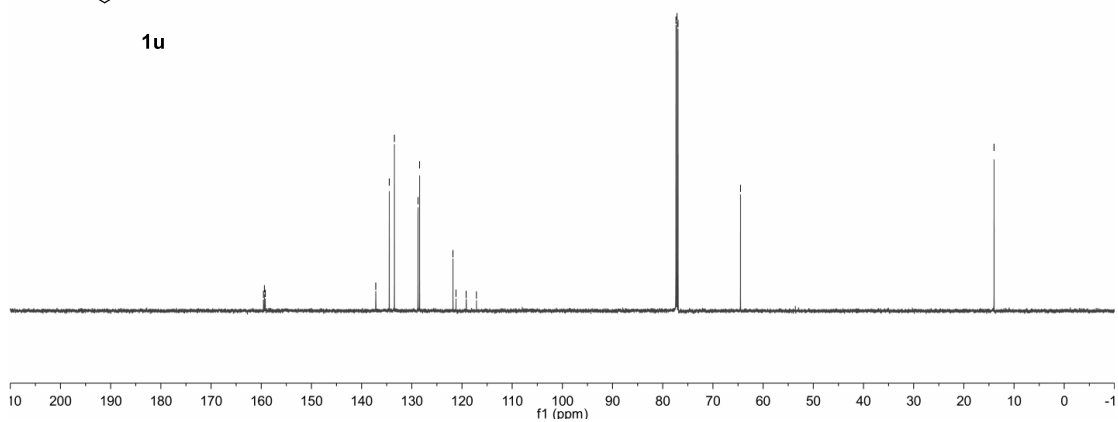

WHH-YL-10 1u

105.29  
105.68  
108.11  
108.50

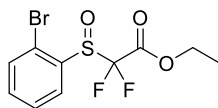

1u

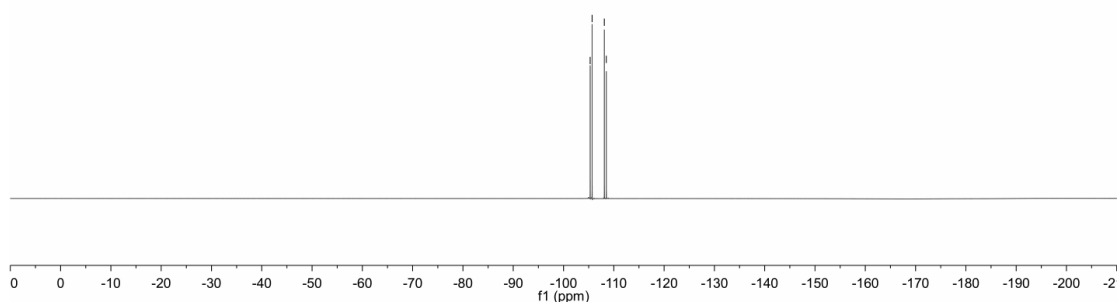

WHH-YL-11 1v

7.91  
7.90  
7.51  
7.50  
7.49  
7.49  
7.48  
7.48  
7.46  
7.45  
7.44  
7.43  
7.43  
7.29  
7.27  
7.26  
4.30  
4.29  
4.28  
4.27  
4.27  
4.26  
4.26  
4.25  
4.24  
4.24  
4.23  
4.23  
4.22  
4.21  
2.46  
1.28  
1.27  
1.26

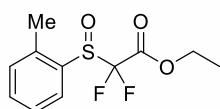

1v

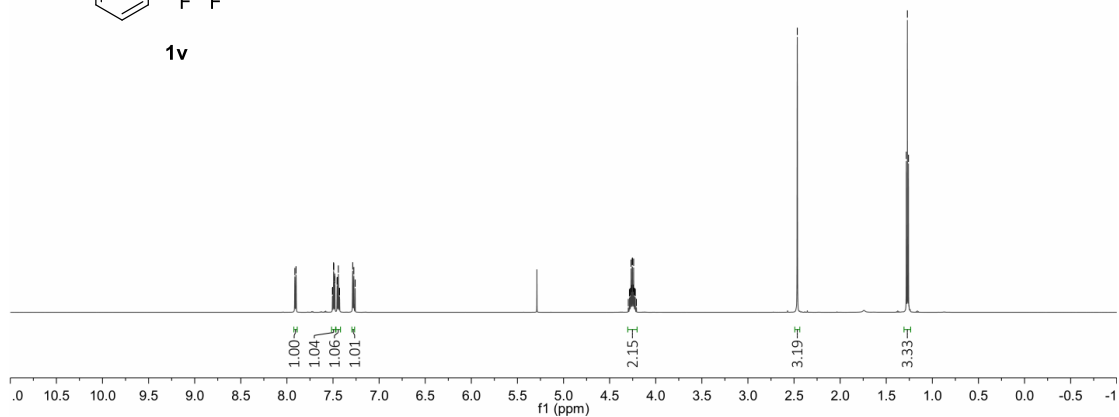

WHH-YL-11 1v

159.73  
159.55  
159.36  
138.37  
134.86  
133.00  
131.30  
127.07  
126.20  
120.97  
118.93  
116.94  
77.37  
77.16  
76.95  
64.27  
18.64  
13.93

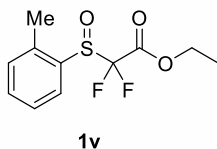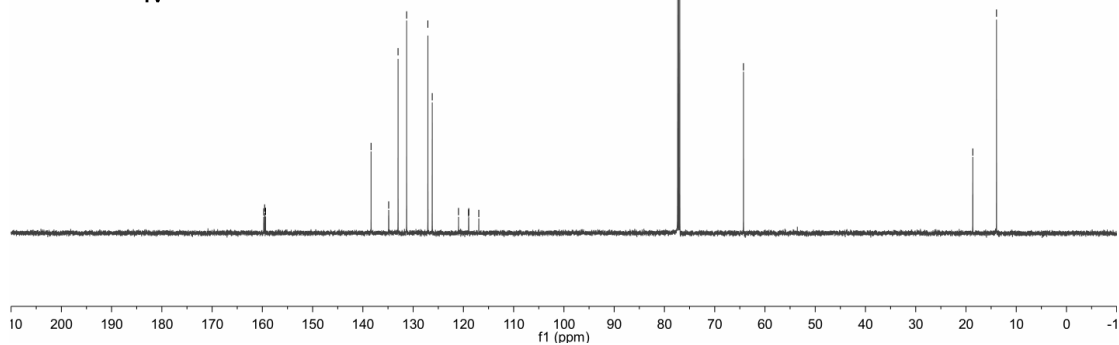

WHH-YL-11 1v

106.01  
106.41  
110.47  
110.87

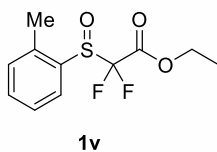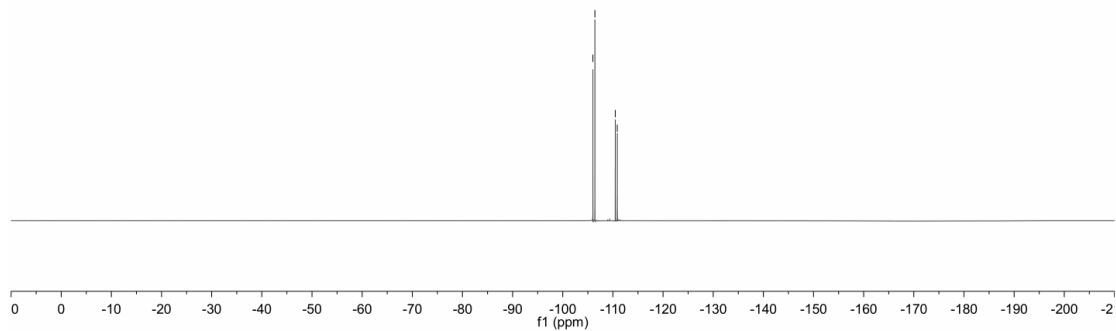

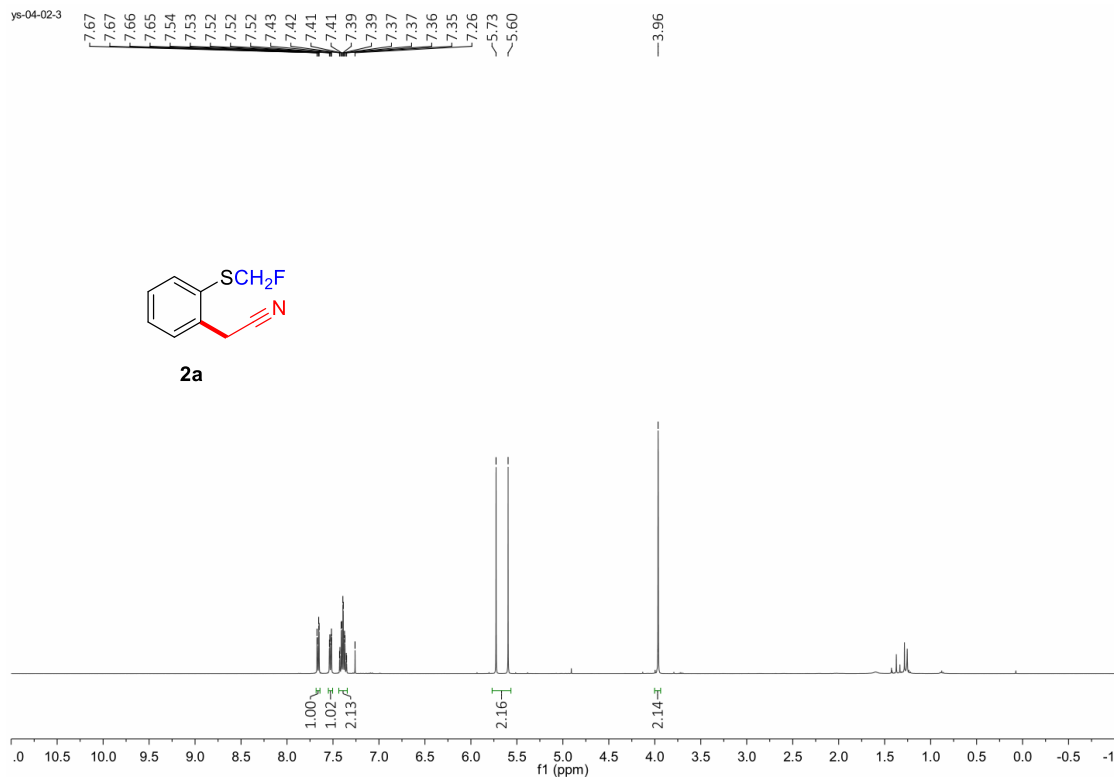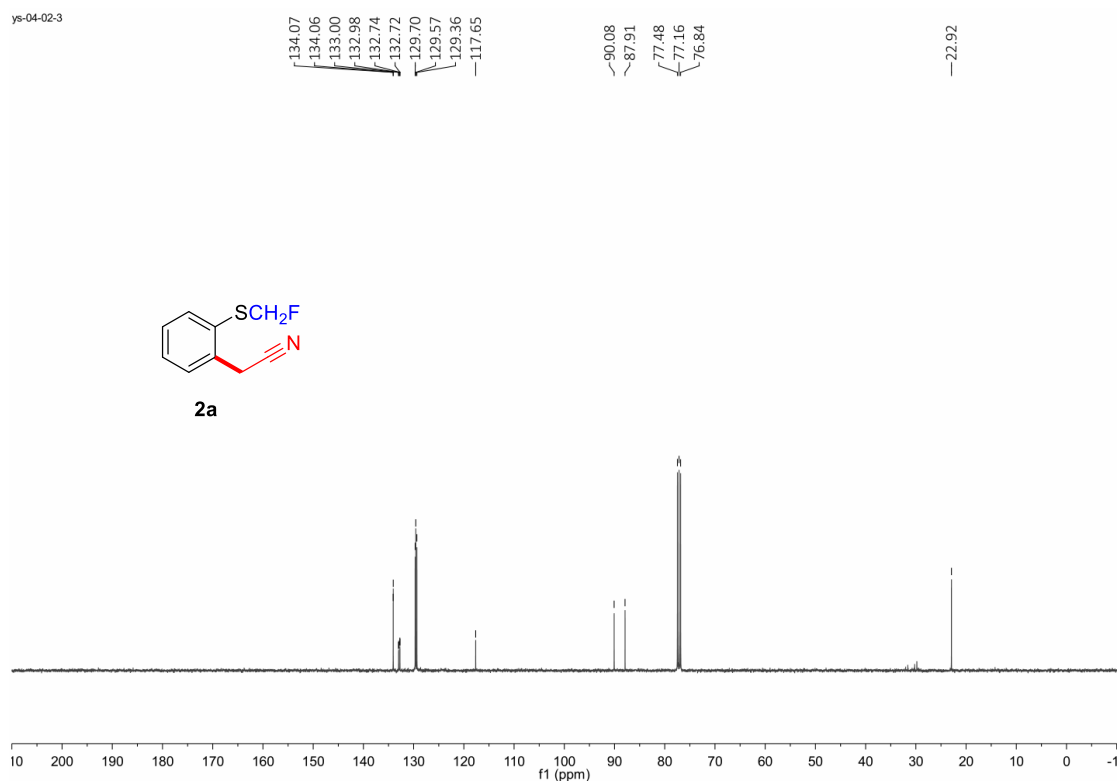



ys-04-02-3

182.38  
182.52  
182.66

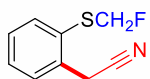

2a

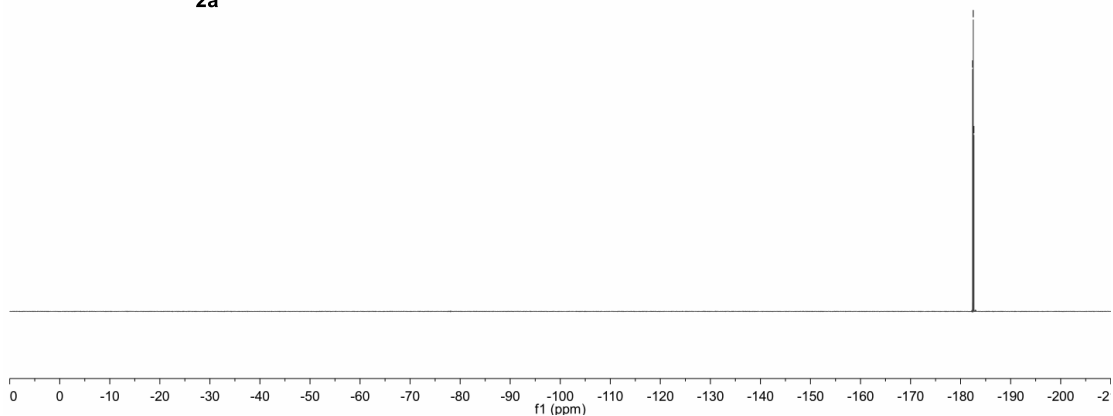

YS-03-100-2

7.70  
7.70  
7.69  
7.69  
7.62  
7.61  
7.53  
7.53  
7.52  
7.52  
7.50  
7.50  
7.41  
7.41  
7.40  
7.40  
7.39  
7.39  
7.26  
6.90  
6.81  
6.71  
4.03

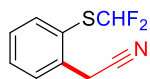

2b

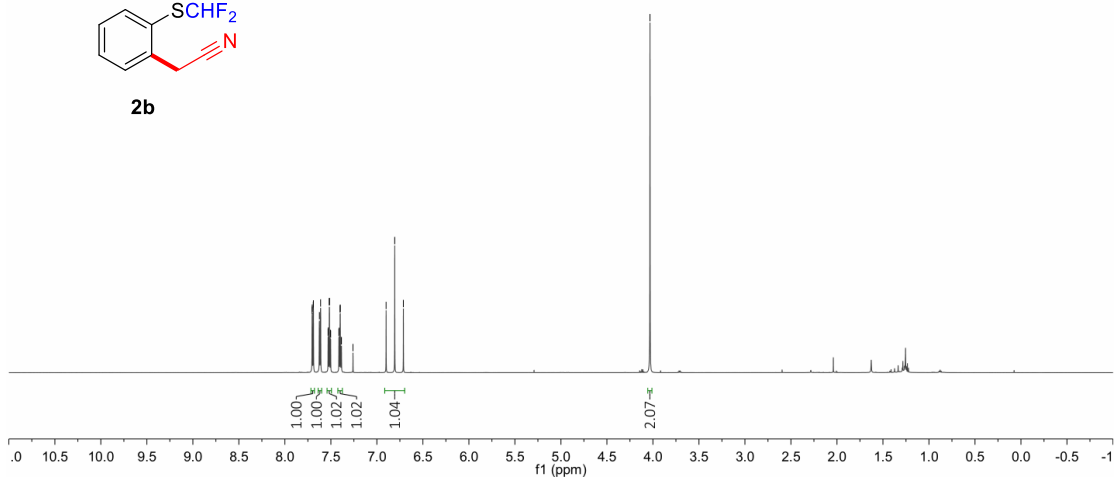

YS-03-100-2

138.69  
135.89  
131.62  
129.83  
129.39  
124.55  
122.03  
120.20  
118.36  
117.60

77.37  
77.16  
76.95

23.18

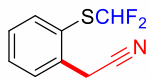

2b

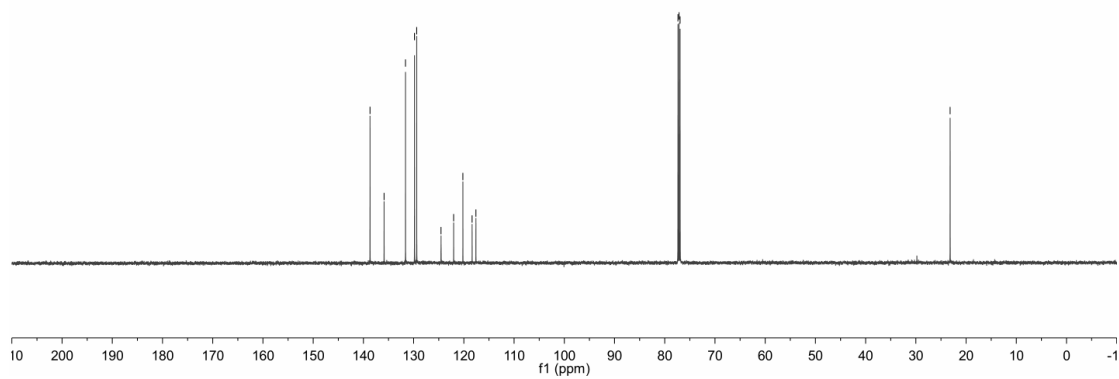

YS-03-100-2

91.34  
91.44

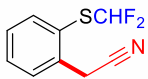

2b

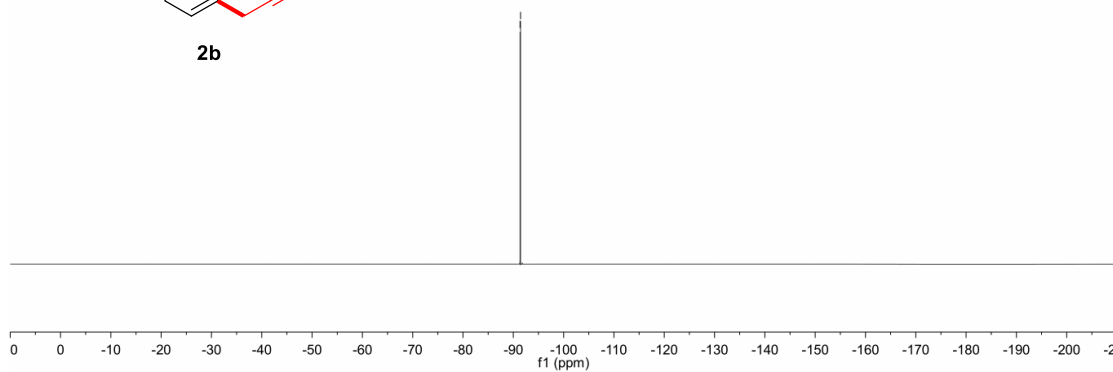

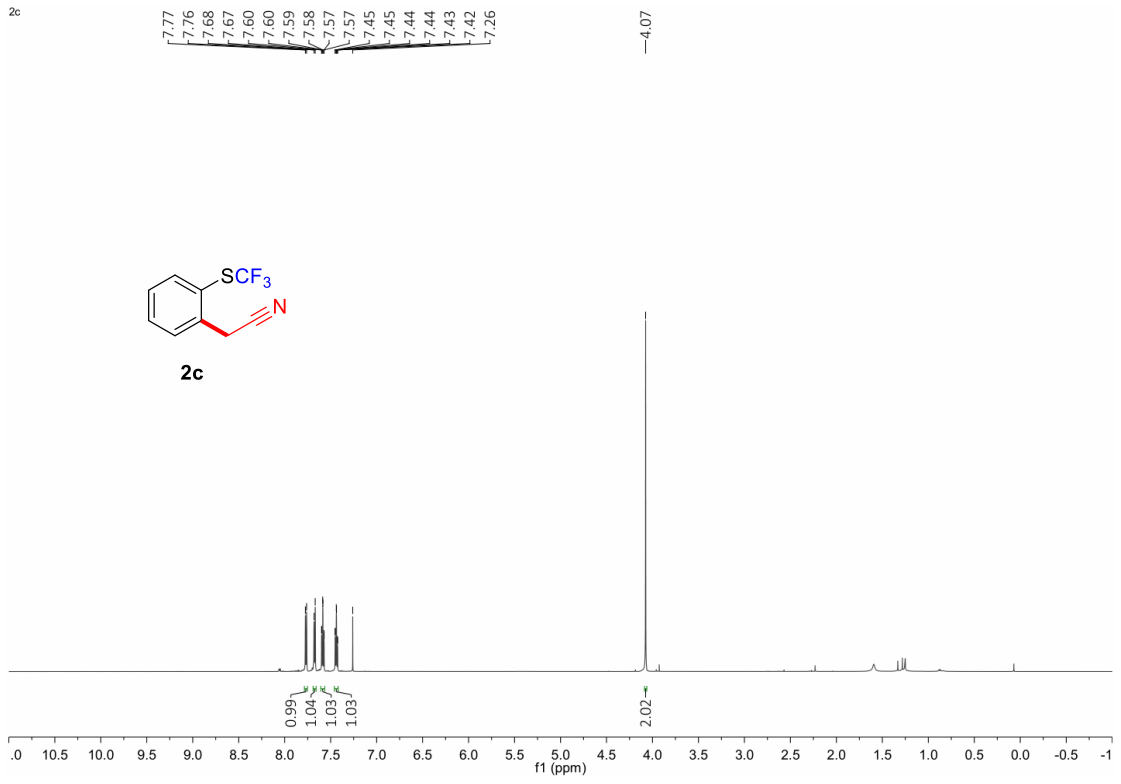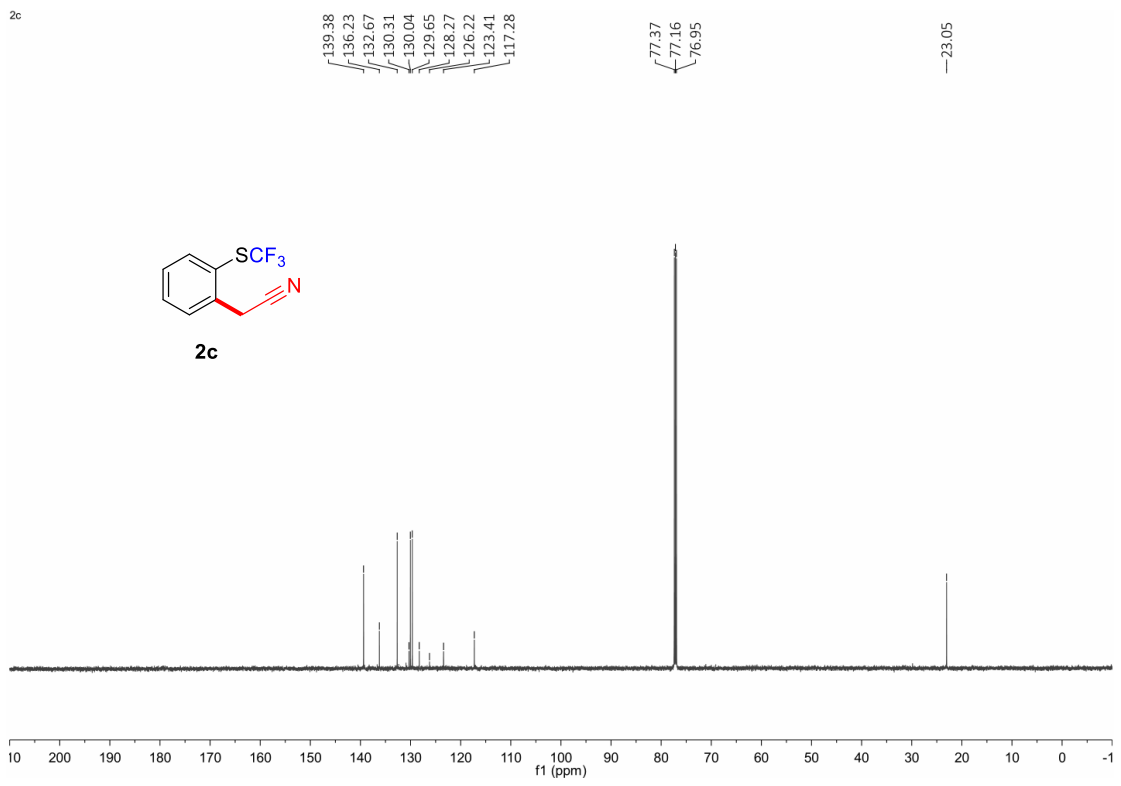

ys-03-98-3

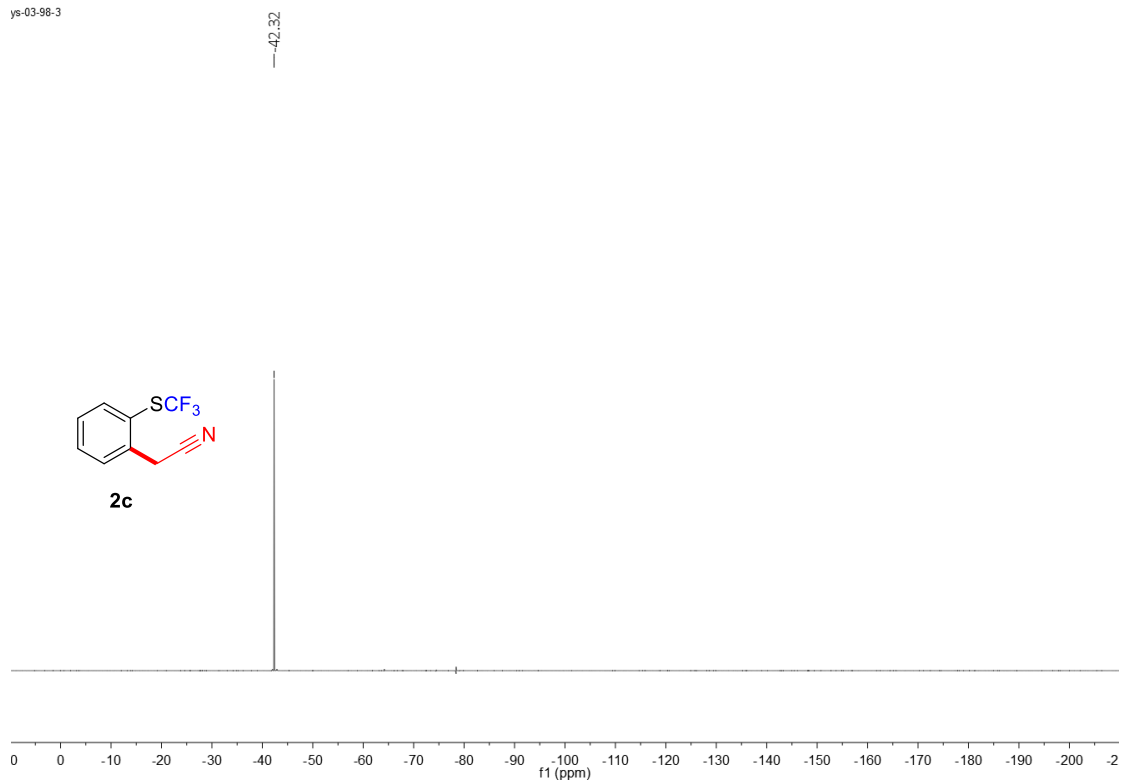

ys-04-08-1

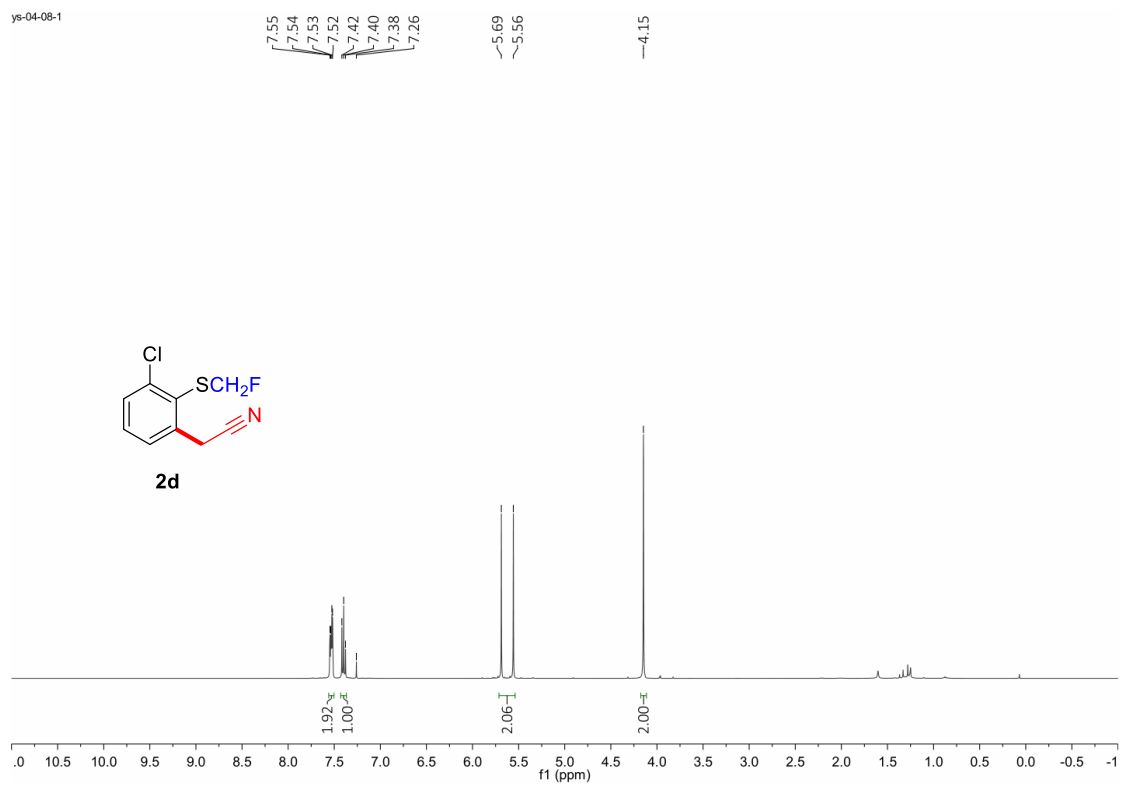

YS-04-08-1

140.90  
140.89  
138.27  
131.46  
130.55  
130.05  
127.76  
117.57  
89.45  
88.00  
77.37  
77.16  
76.95

24.51

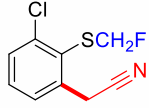

2d

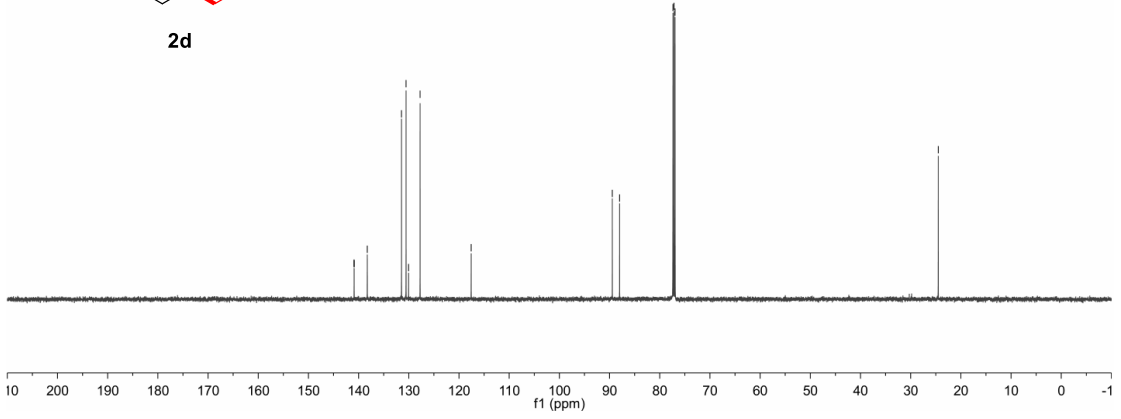

YS-04-08-1

184.96  
185.05  
185.14

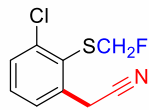

2d

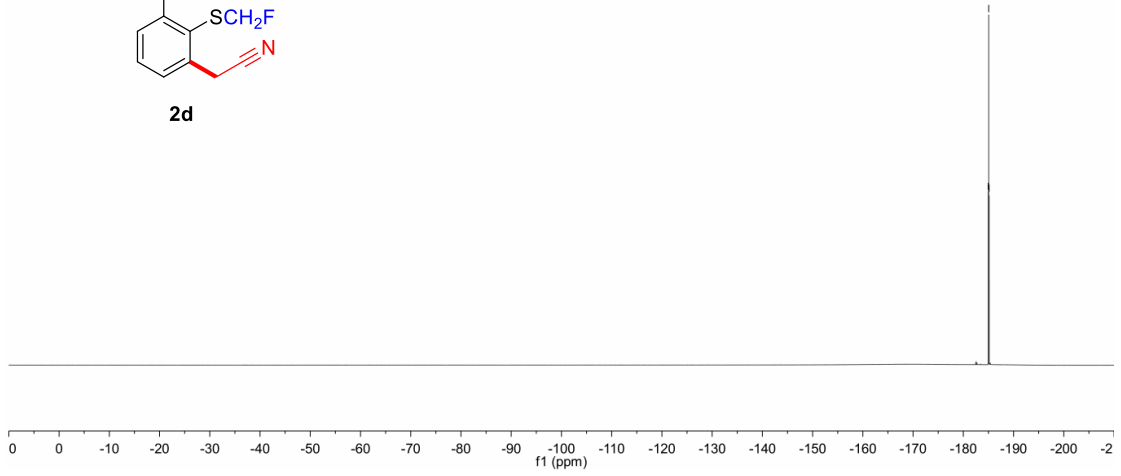

ys-04-22-3

7.65  
7.64  
7.62  
7.62  
7.60  
7.60  
7.47  
7.45  
7.38  
7.38  
7.36  
7.36  
7.34  
7.32  
7.30  
7.26  
5.75  
5.74  
5.62  
5.61  
-4.13  
-3.90

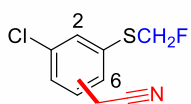

**2e**

C2/C6 = 25/75

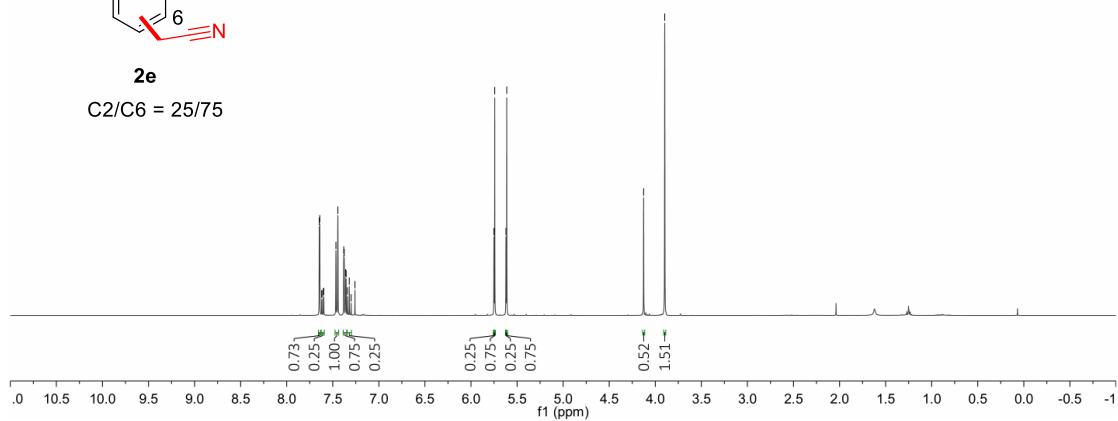

ys-04-22-3

136.04  
136.02  
135.55  
135.13  
134.78  
134.75  
133.01  
133.00  
132.52  
132.51  
130.81  
130.79  
130.55  
130.38  
130.36  
129.61  
117.15  
116.28  
89.69  
89.42  
87.50  
87.23  
77.48  
77.16  
76.84  
22.41  
20.65

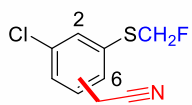

**2e**

C2/C6 = 25/75

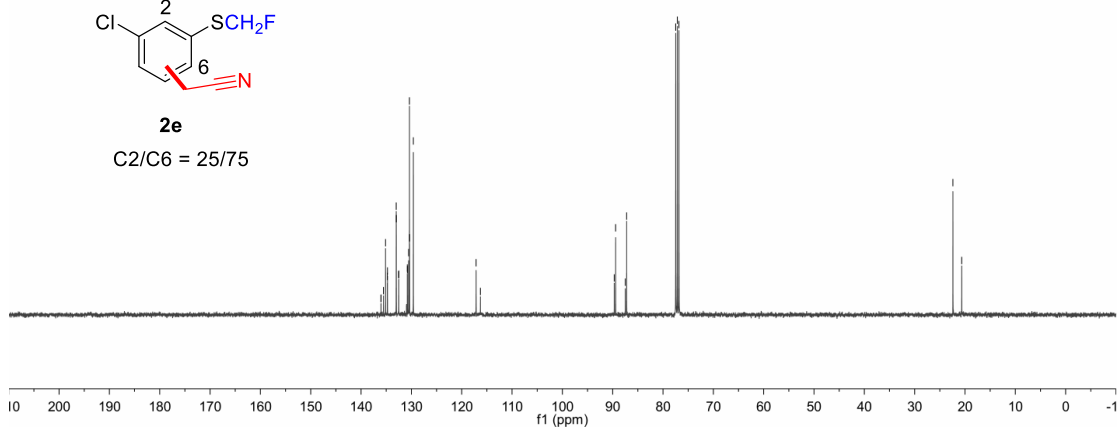

ys-04-08-2-xd

182.95  
183.09  
183.23  
183.29  
183.43  
183.57

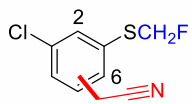

**2e**

C2/C6 = 25/75

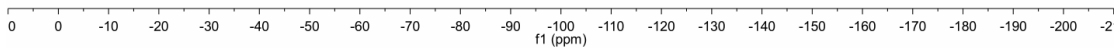

ys-04-08-3

7.60  
7.58  
7.53  
7.53  
7.36  
7.36  
7.34  
7.34  
7.26

5.69  
5.56

3.94

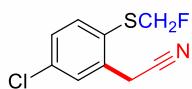

**2f**

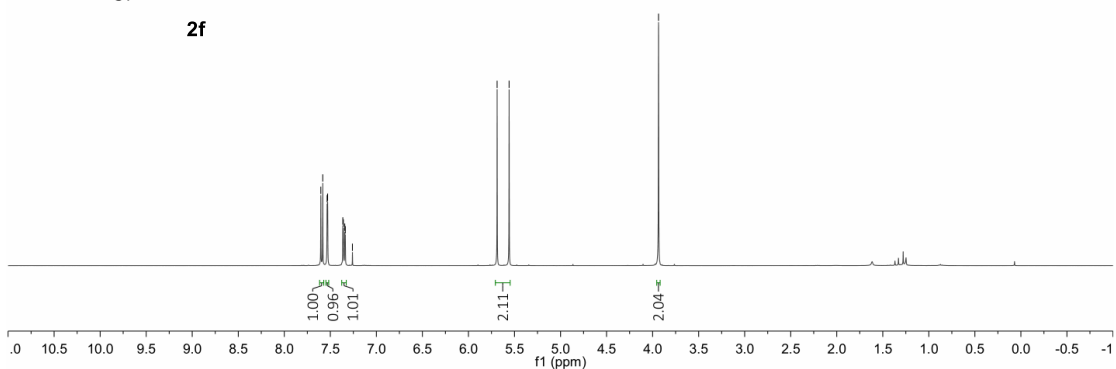

ys-04-08-3

135.94  
135.46  
135.44  
134.58  
134.56  
131.32  
131.29  
129.73  
129.42  
117.01

89.95  
87.77  
77.48  
77.16  
76.84

22.87

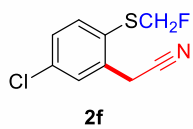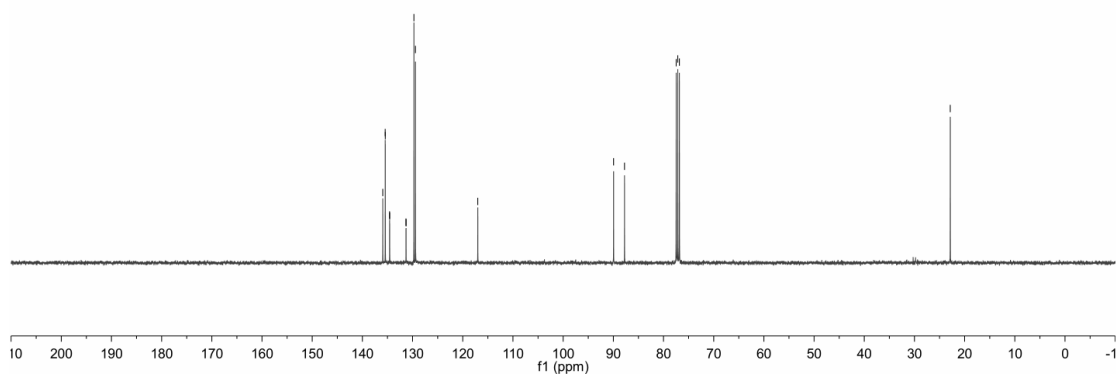

ys-04-08-3

182.74  
182.88  
183.02

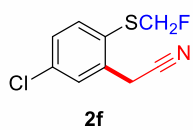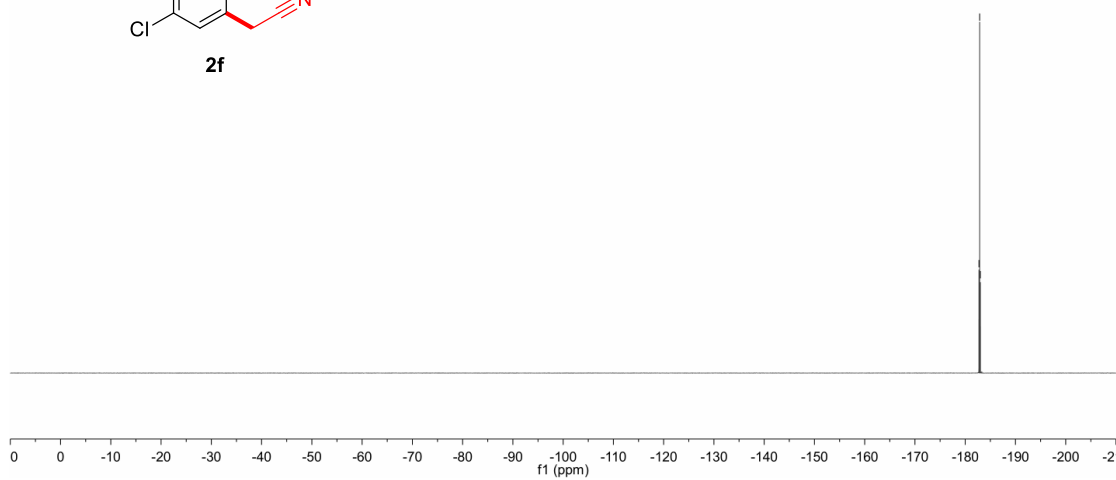



YS-04-14-1

7.58  
7.56  
7.48  
7.46  
7.45  
7.26  
6.94  
6.85  
6.75

-4.12

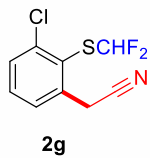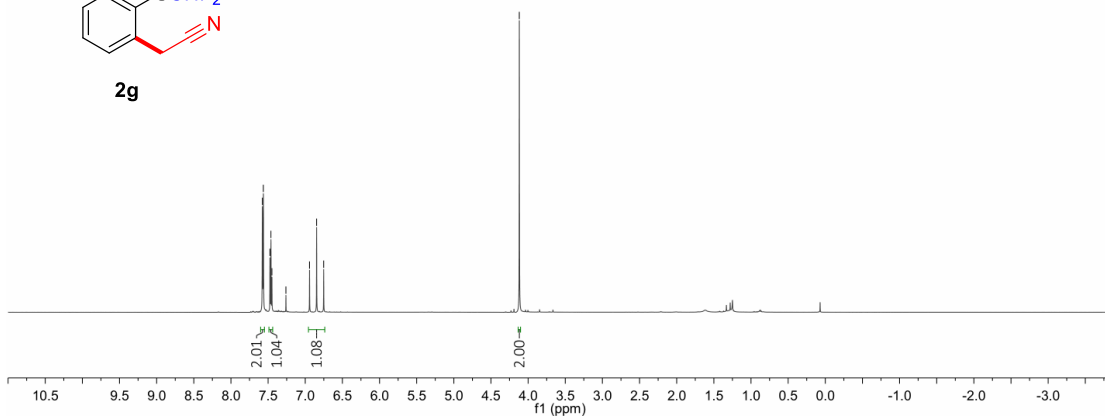

ys-04-14-1

142.56  
139.13  
132.47  
130.64  
128.16  
124.31  
124.28  
124.25  
122.71  
119.95  
117.25  
117.18

77.48  
77.16  
76.84

-24.41

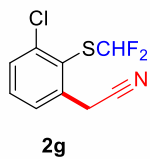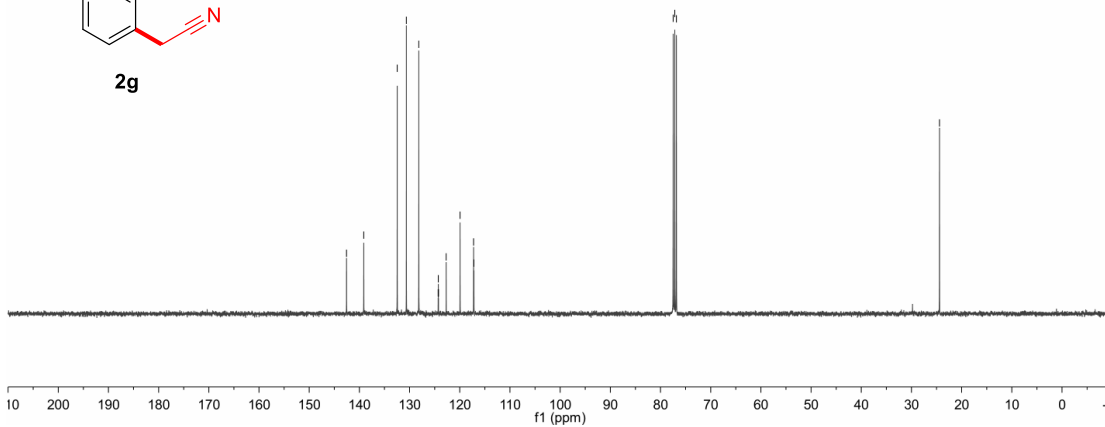

ys-04-14-1

91.72

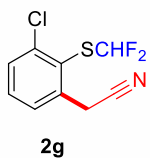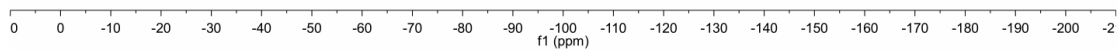

ys-04-23-2

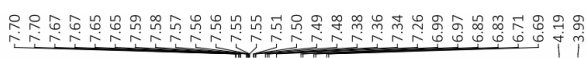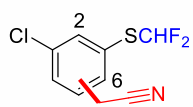

C2:C6 = 25:75

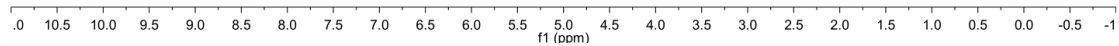

ys-04-23-2

138.01  
137.27  
136.12  
134.91  
134.33  
132.63  
131.74  
130.83  
130.15  
127.48  
127.45  
127.42  
126.13  
126.11  
126.08  
122.48  
119.72  
117.16  
116.96  
116.14  
77.48  
77.16  
76.84

22.77  
21.24

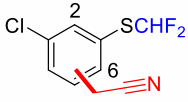

2h

C2:C6 = 25:75

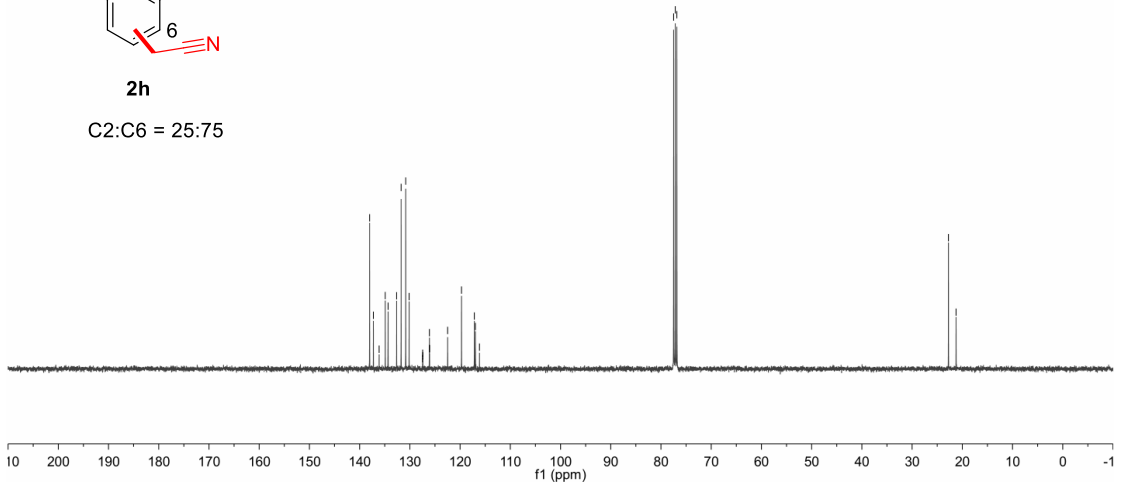

ys-04-23-2

91.24  
91.53

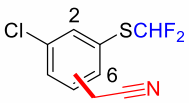

2h

C2:C6 = 25:75

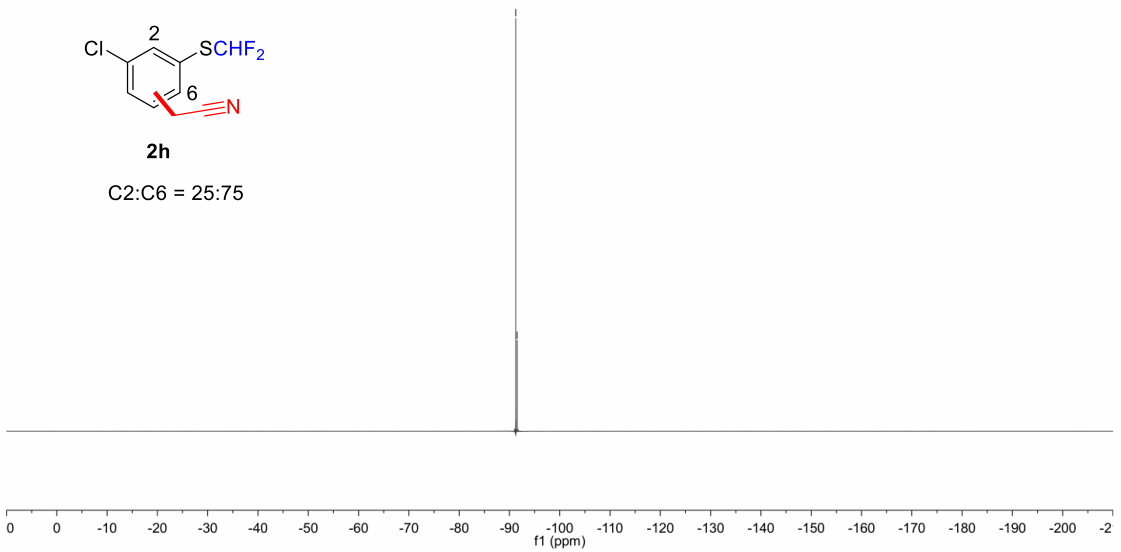

WHH-23-11-24-B

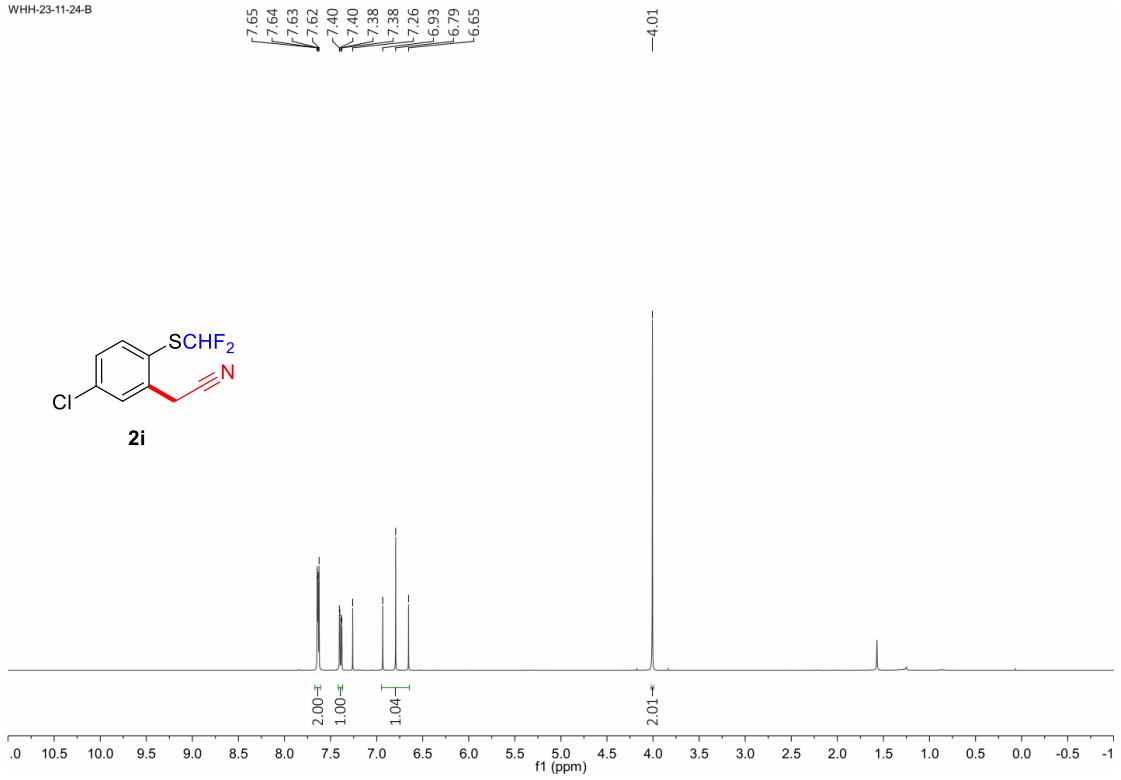

WHH-23-11-24-B

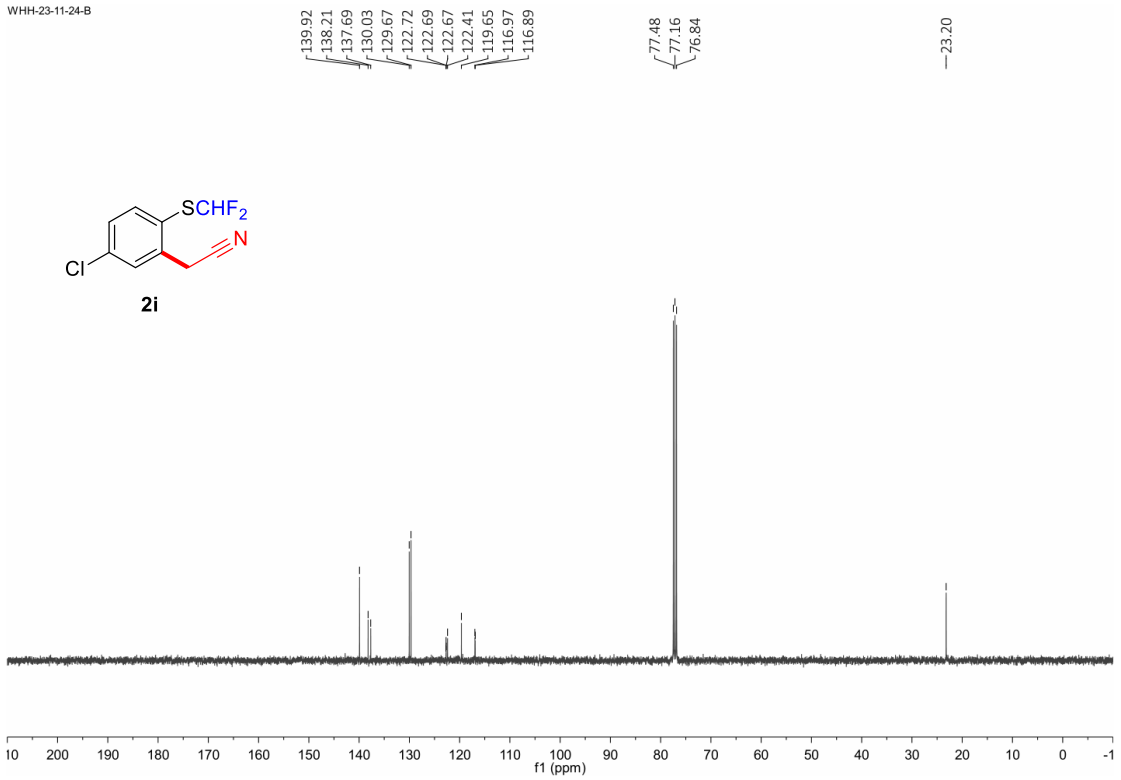

—91.52

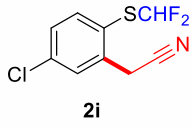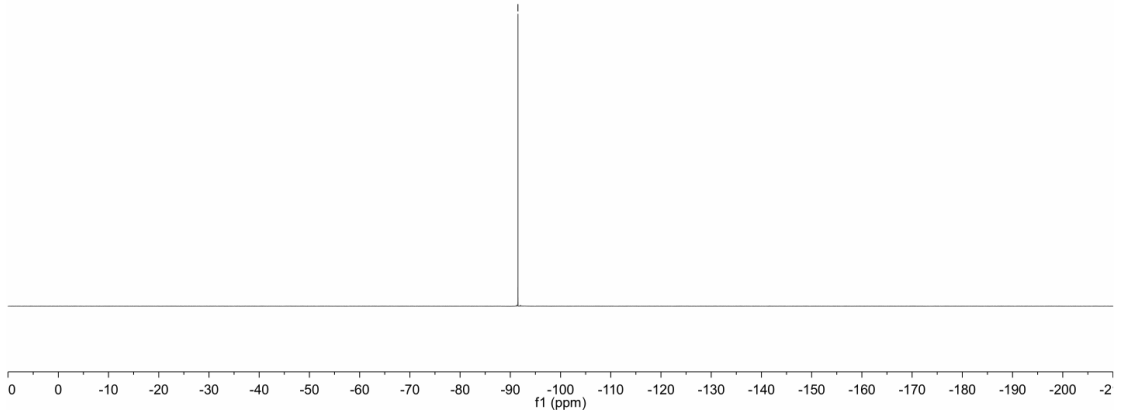

2j 去耦碳

7.76  
7.75  
7.70  
7.69  
7.62  
7.61  
7.60  
7.59  
7.45  
7.44  
7.43  
7.26

—4.06

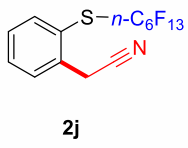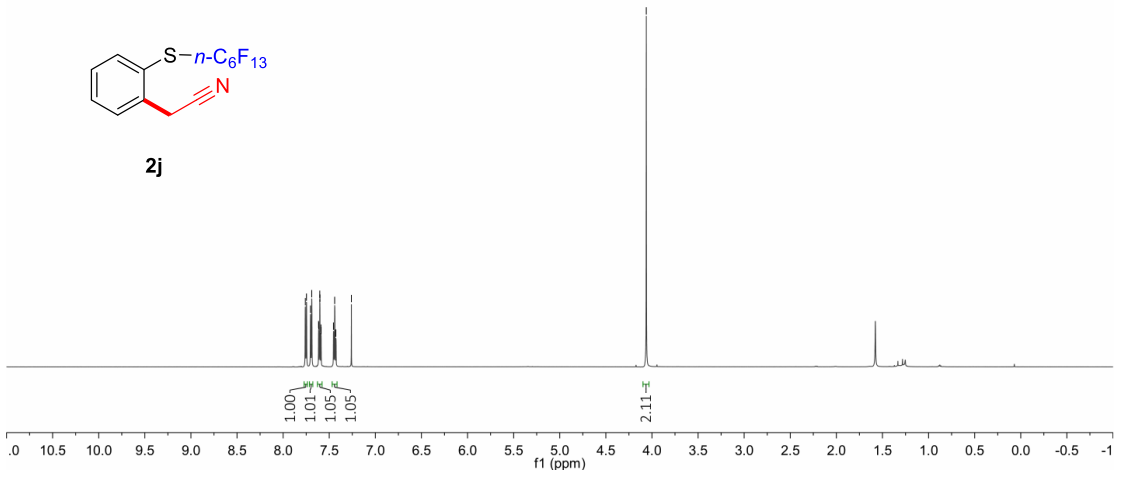



WHH-23-12-4-1

7.71  
7.69  
7.67  
7.65  
7.65  
7.57  
7.57  
7.55  
7.55  
7.53  
7.53  
7.42  
7.42  
7.40  
7.40  
7.38  
7.38  
7.26

4.30  
4.28  
4.27  
4.25  
4.07

1.31  
1.29  
1.27

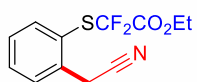

**2k**

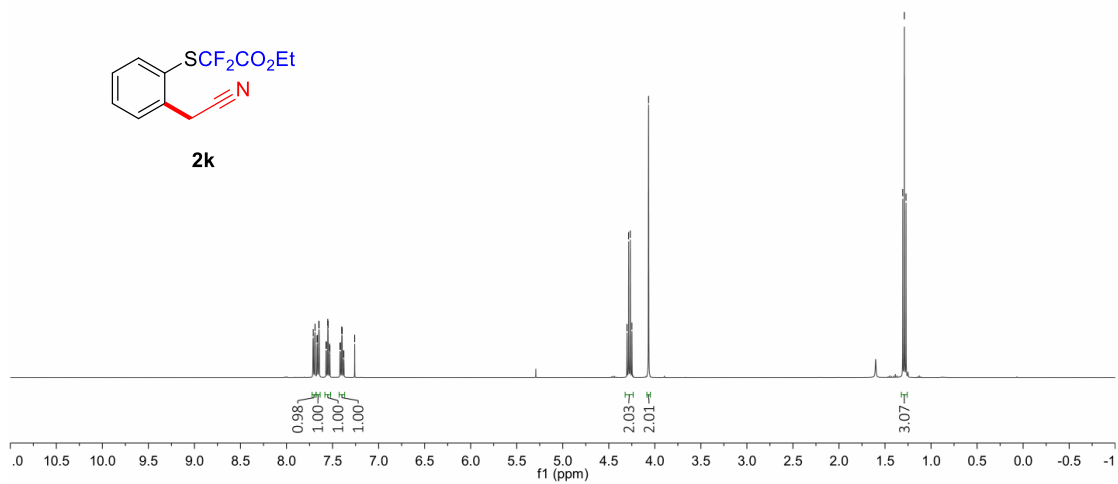

WHH-23-12-4-1

161.60  
161.28  
160.97

139.53  
136.56  
132.27  
129.79  
129.30  
123.90  
123.14  
120.28  
117.51  
117.41

77.48  
77.16  
76.84

64.12

23.09  
13.91

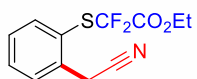

**2k**

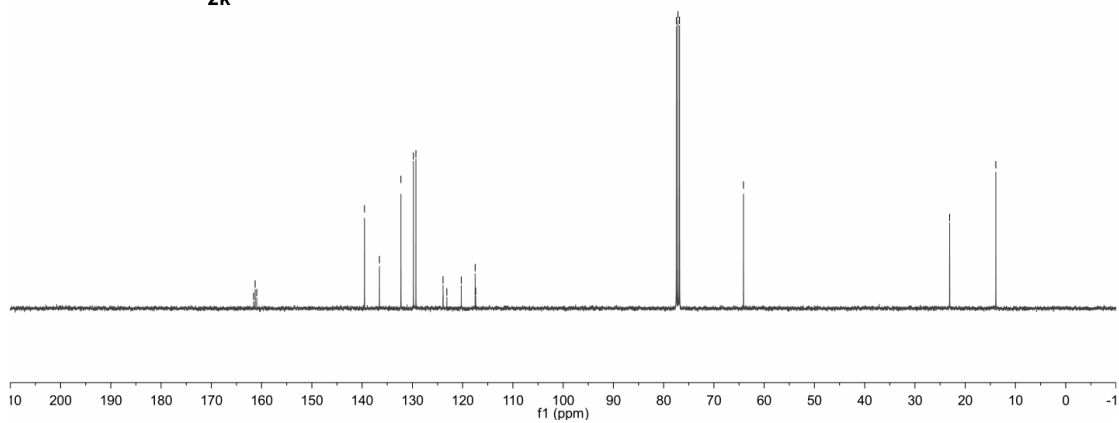

WHH-23-12-4-1

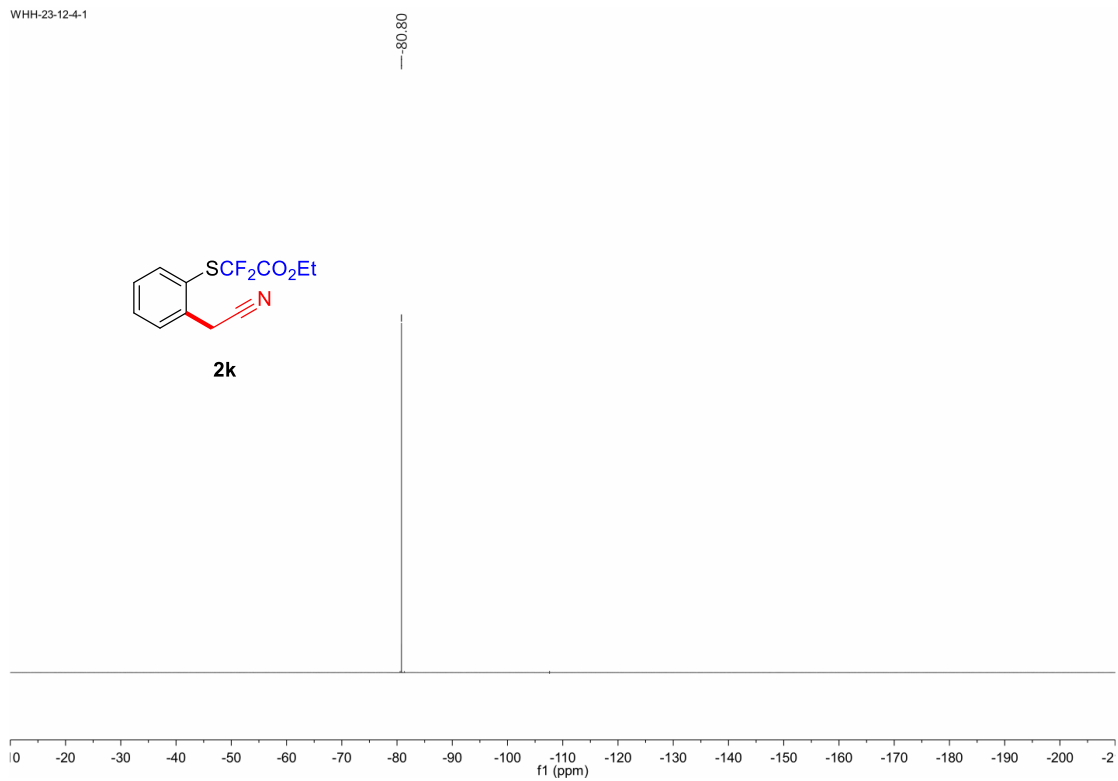

WHH-23-10-12-C1

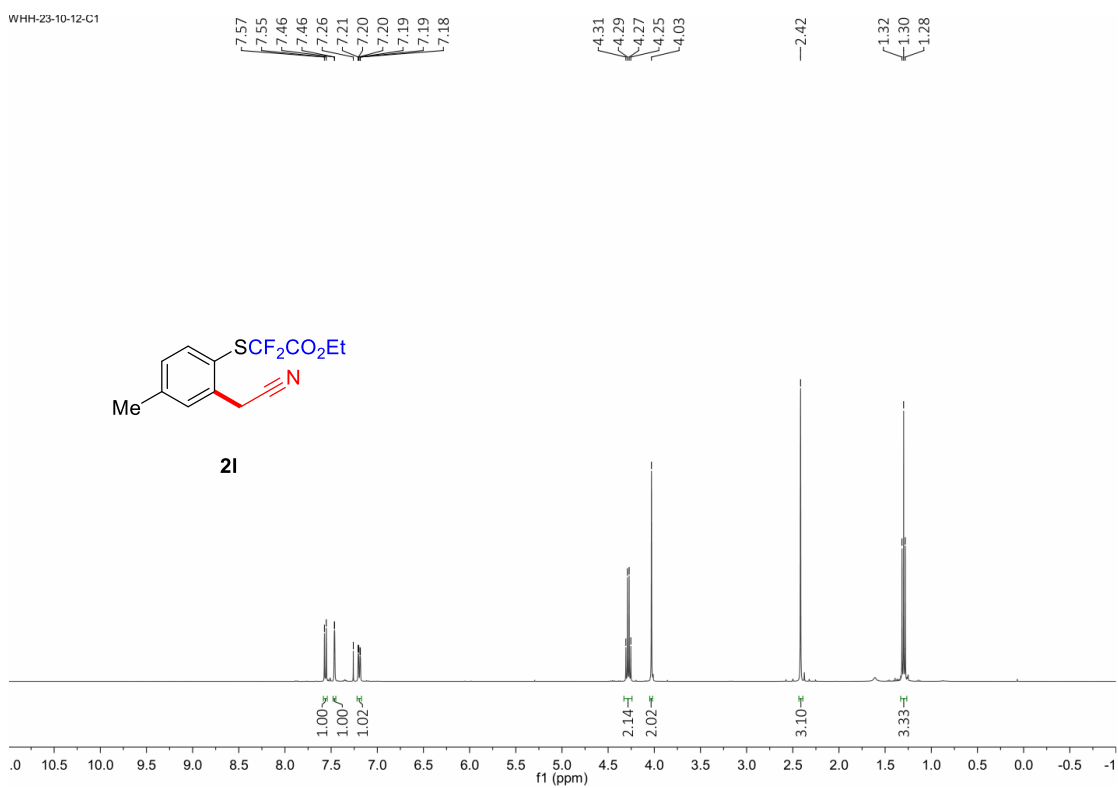



WHH-23-10-12-C1

161.70  
161.39  
161.07  
143.15  
139.40  
136.27  
130.54  
130.07  
123.13  
120.26  
117.69  
117.40

77.48  
77.16  
76.84  
64.06

22.96  
21.48  
13.93

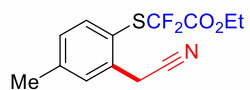

21

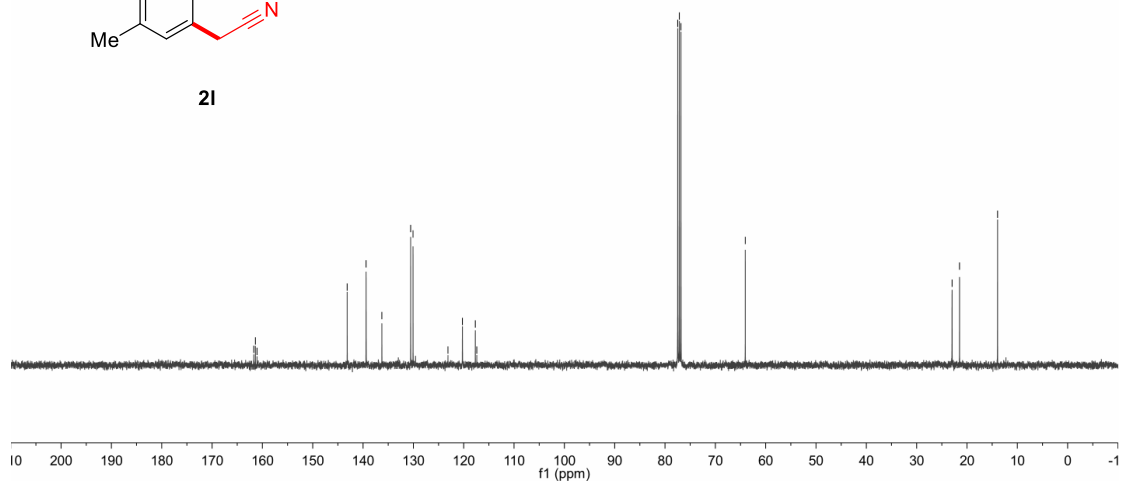

WHH-23-10-12-C1

81.24

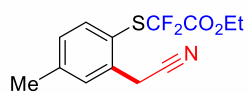

21

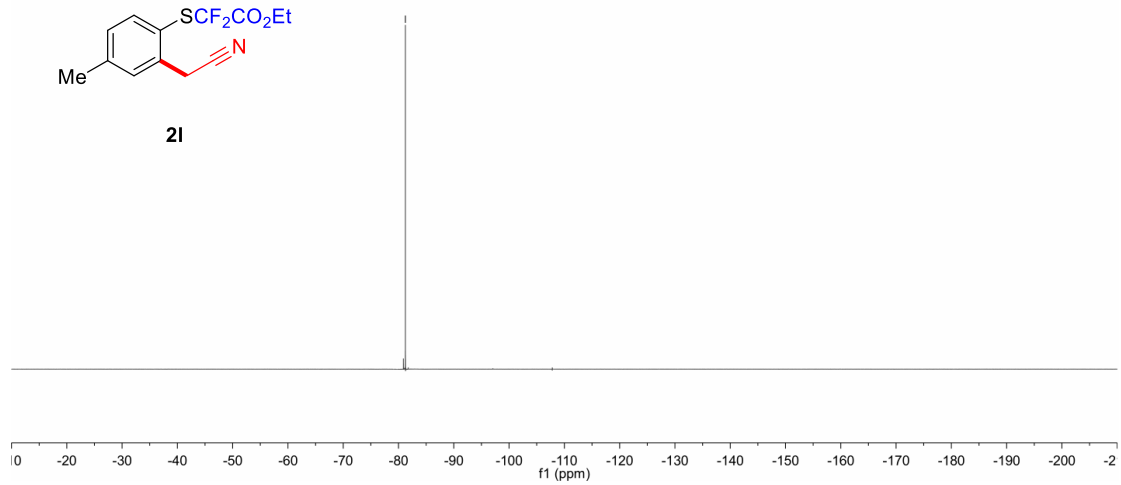

WHH-23-10-12-A1

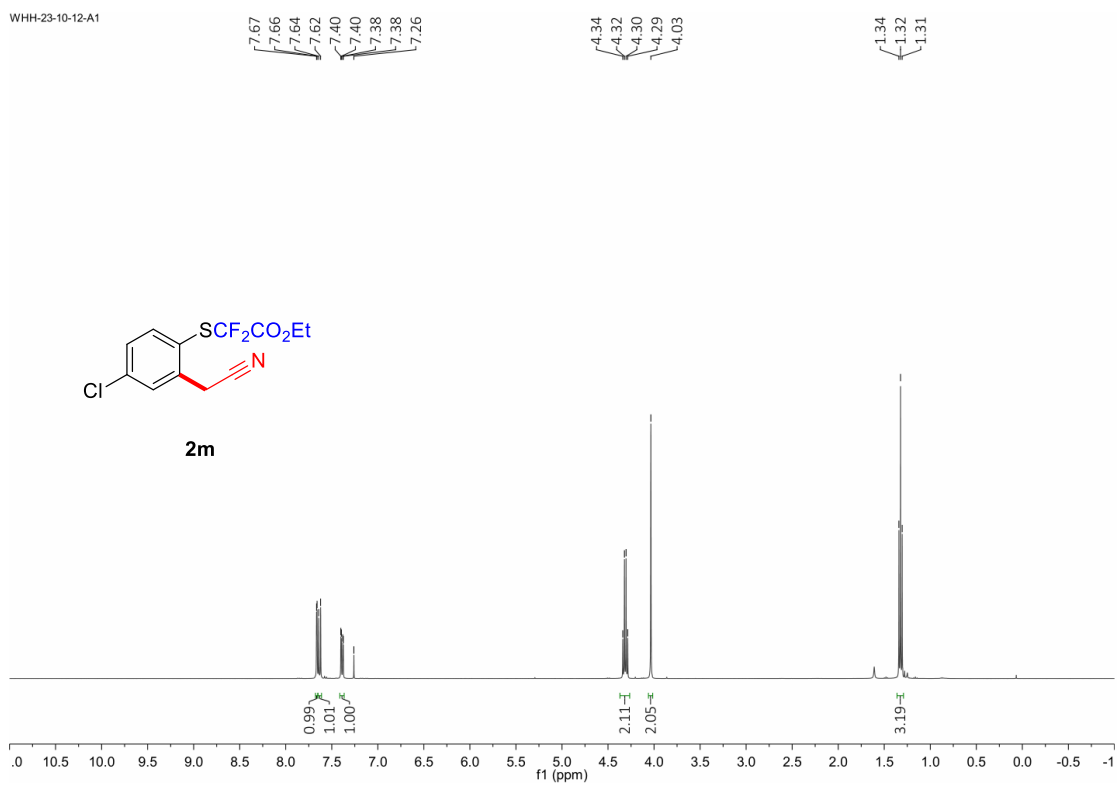

WHH-23-10-12-A1

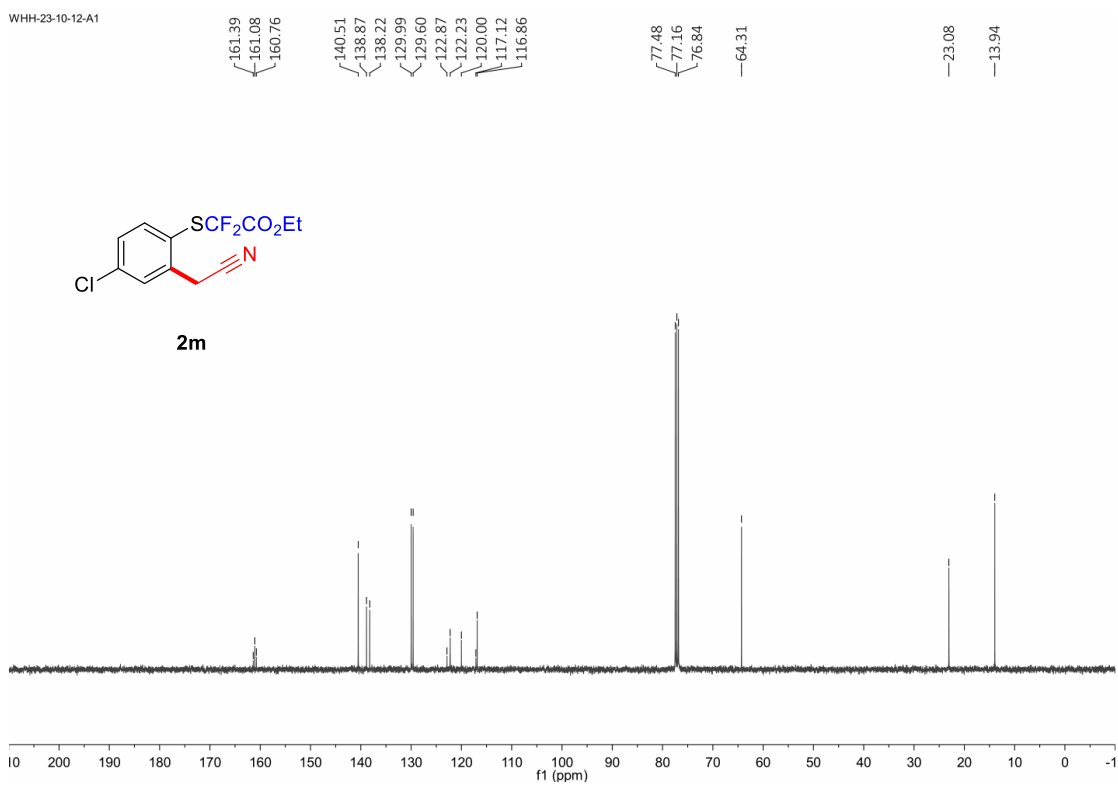

WHH-23-10-12-A1

---80.61

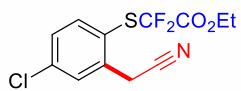

2m

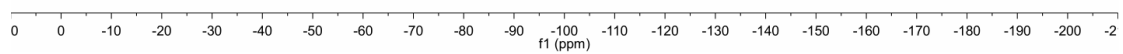

2n WHH-23-10-24-D1

~7.82  
~7.55  
~7.26

4.33  
4.32  
4.31  
4.30  
4.03

1.34  
1.33  
1.31

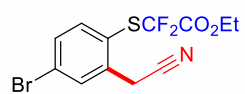

2n

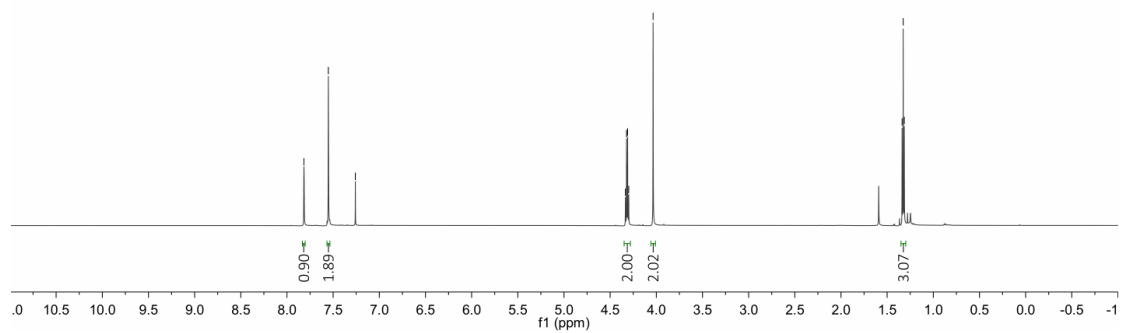

2n WHH-23-10-24-D1

161.28  
161.07  
160.86  
140.62  
138.32  
132.88  
132.64  
127.14  
122.84  
121.82  
119.91  
117.99  
116.88

77.37  
77.16  
76.95  
64.35

22.99  
13.97

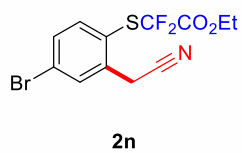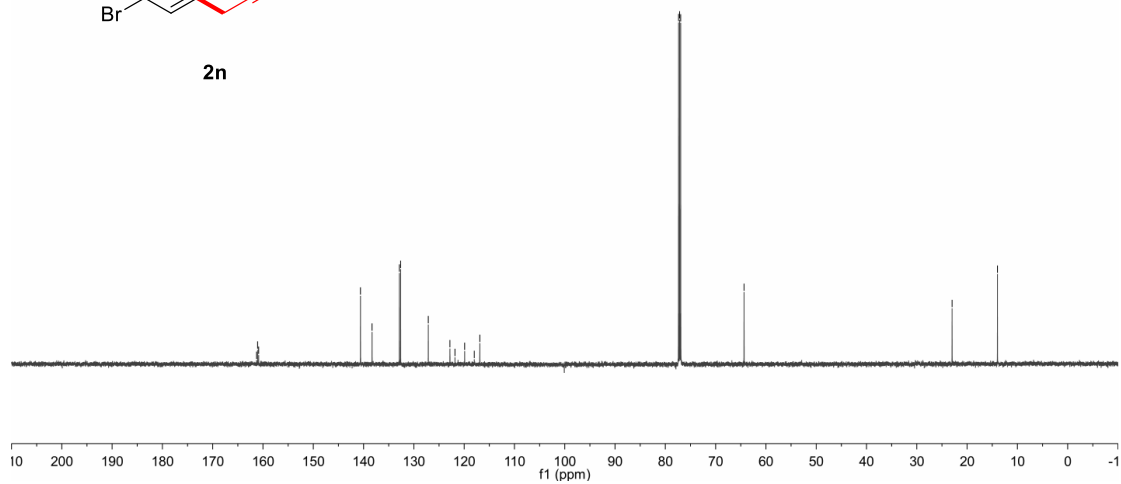

2n WHH-23-10-24-D1

80.55

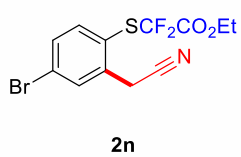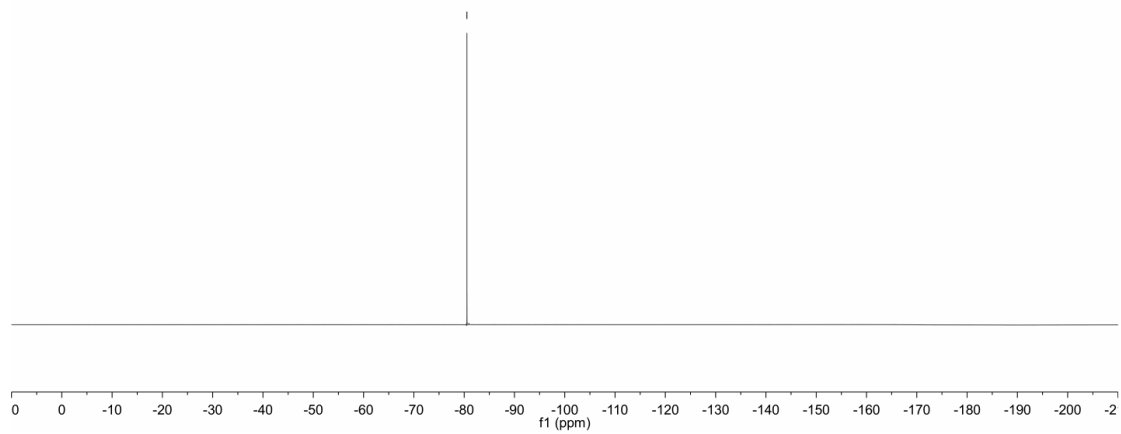

ys-04-20-3

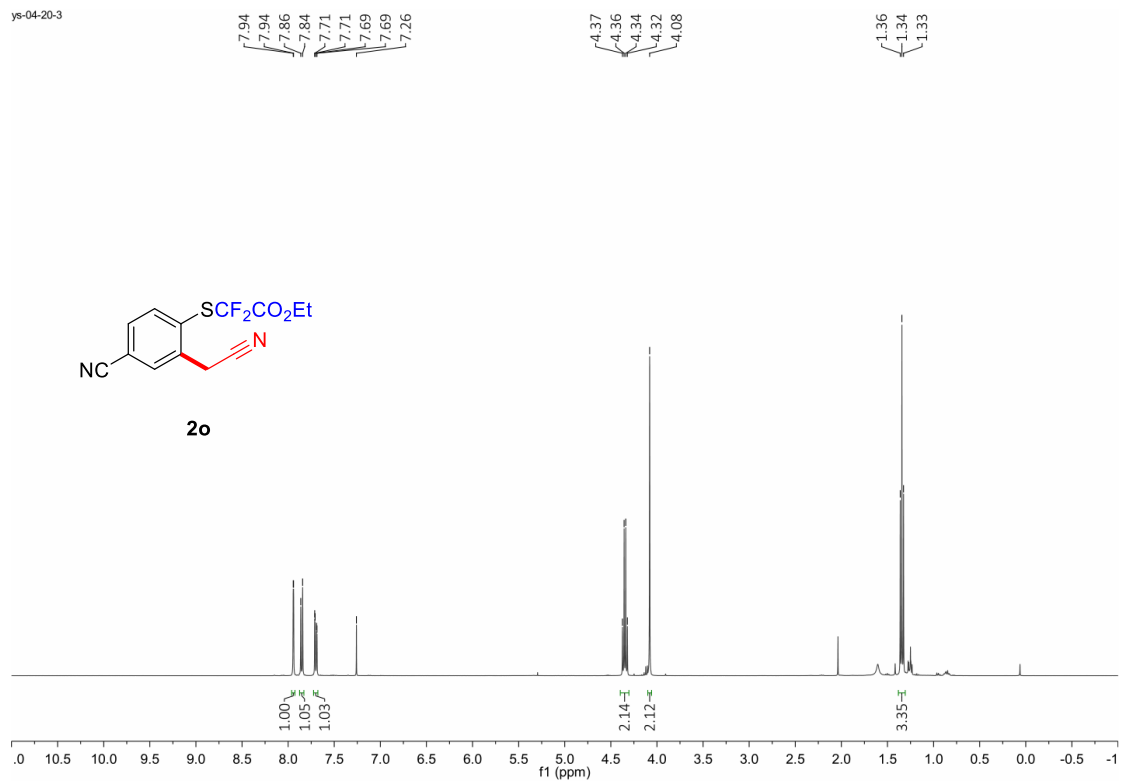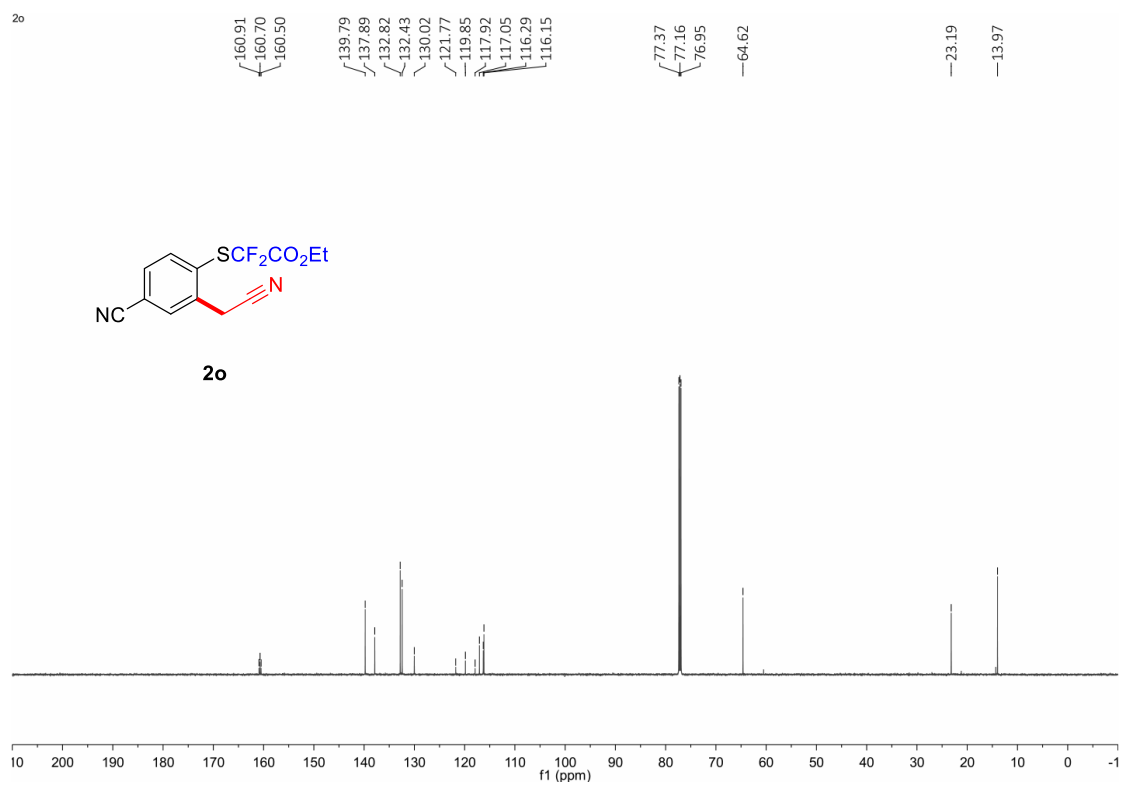

ys-04-20-3

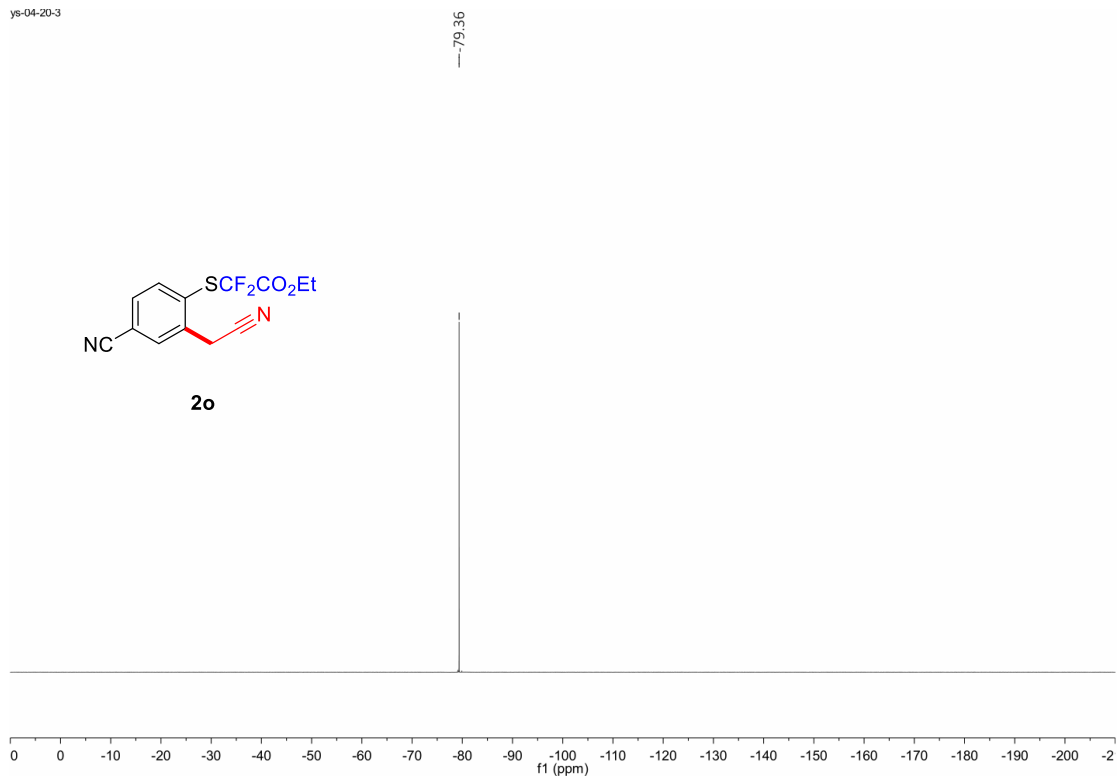

2q WHH-23-12-7-3

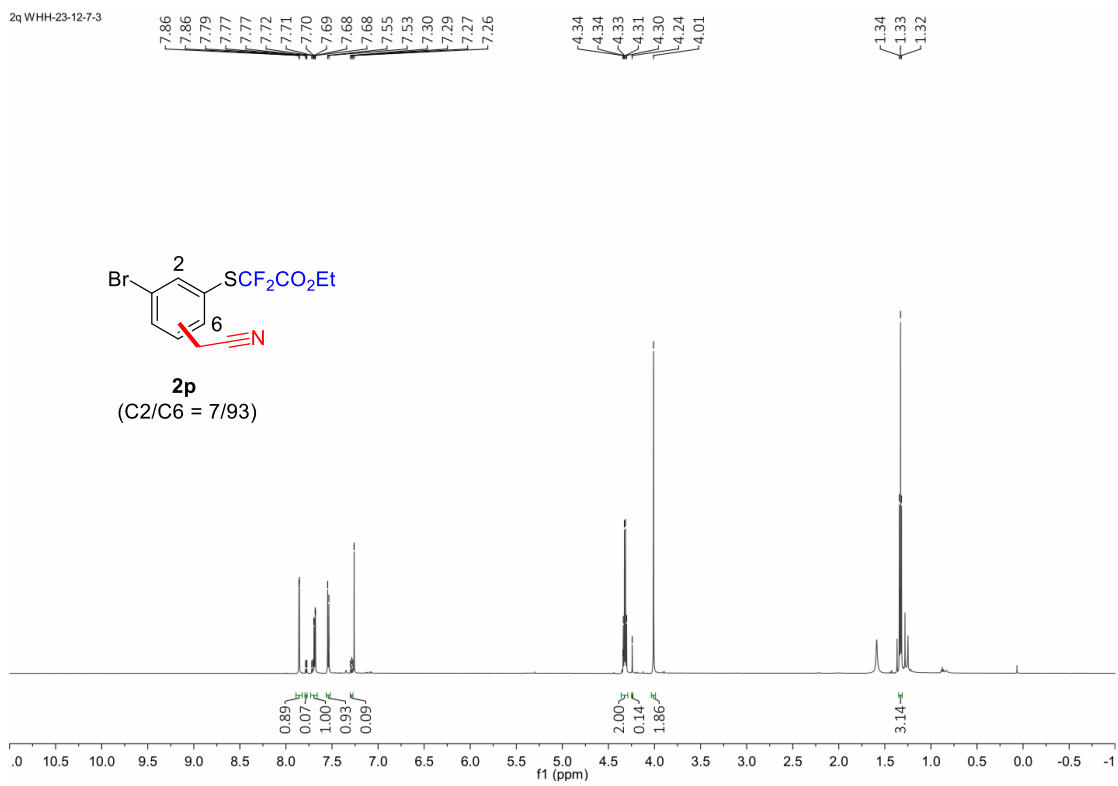

2q WHH-23-12-7-3

161.22  
161.01  
160.80  
141.67  
136.65  
135.54  
135.33  
131.04  
130.41  
125.79  
122.58  
122.03  
120.09  
118.17  
117.01  
115.57

77.37  
77.16  
76.95

-64.38

-53.58

-22.82

-13.98

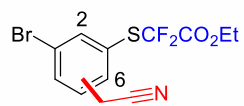

**2p**  
(C2/C6 = 7/93)

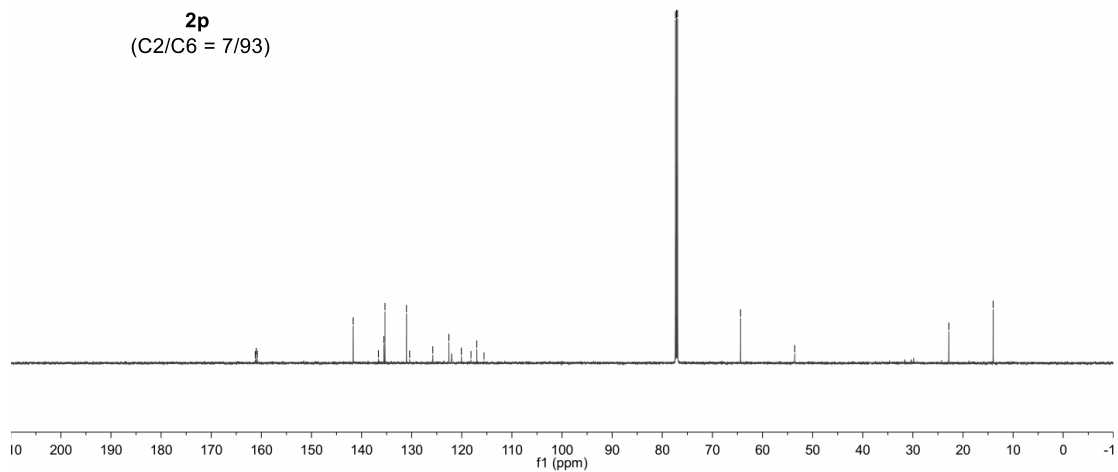

2q WHH-23-12-7-3

80.36  
80.49

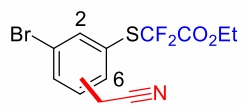

**2p**  
(C2/C6 = 7/93)

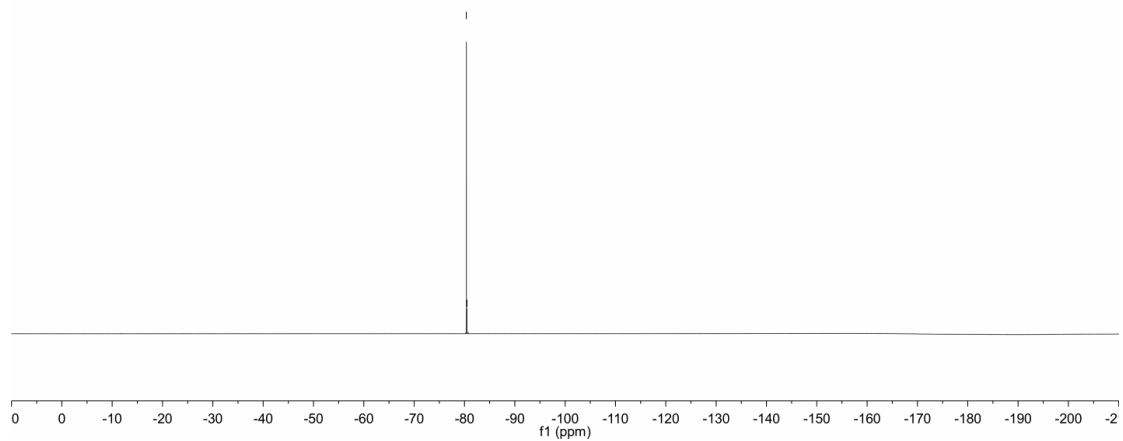

2r WHH-23-12-7-2

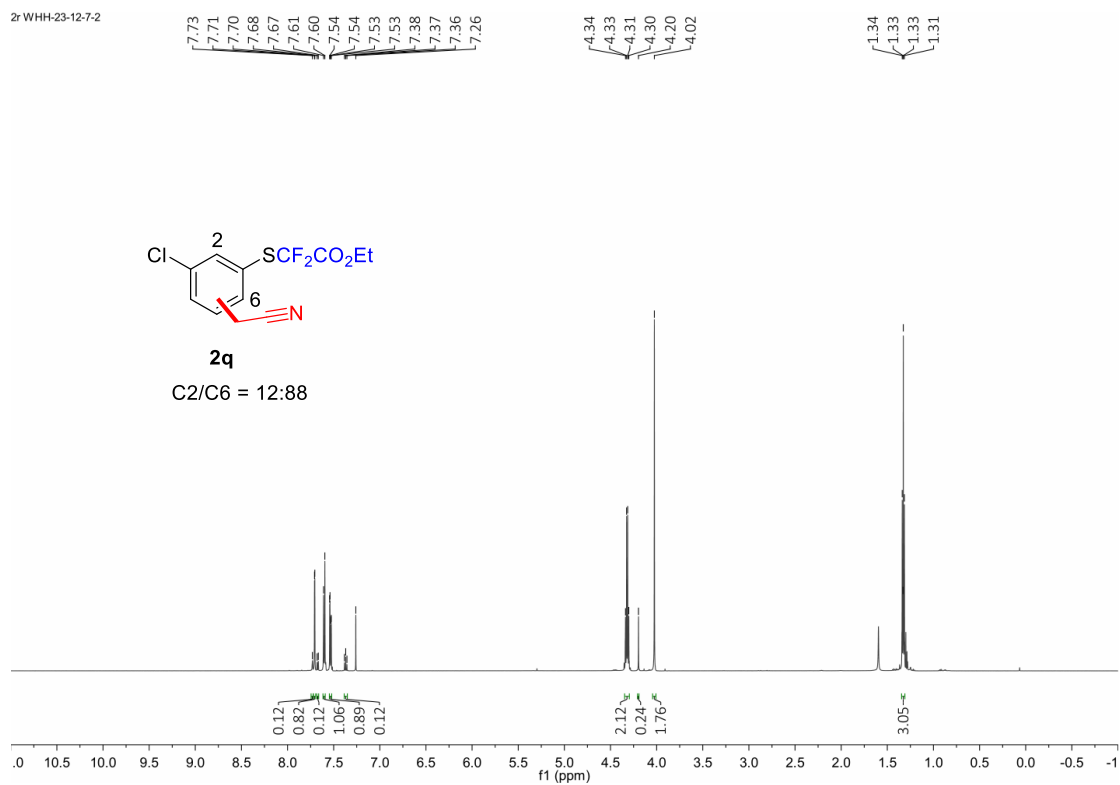

2r WHH-23-12-7-2

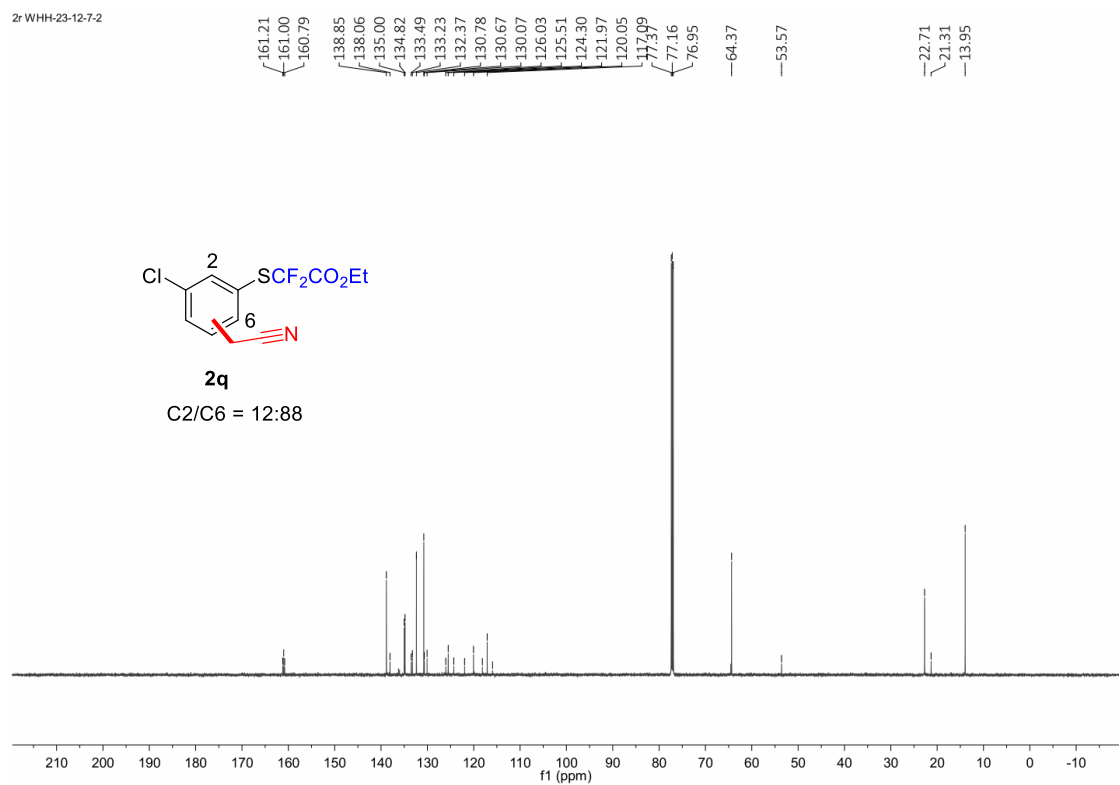



2r WHH-23-12-7-2

80.37  
80.53

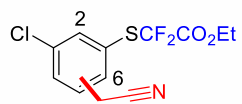

**2q**

C2/C6 = 12:88

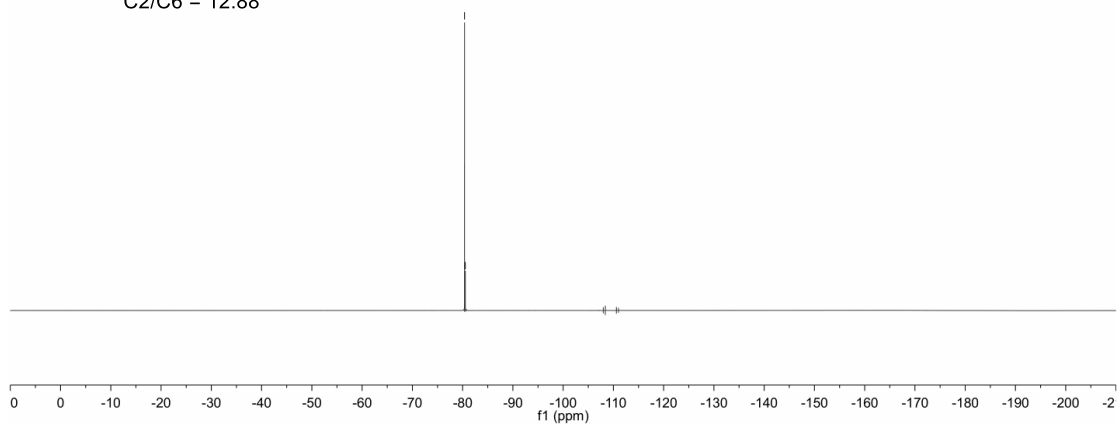

WHH-23-12-4-3

7.68  
7.68  
7.63  
7.26

4.39  
4.37  
4.36  
4.34  
4.14

1.37  
1.36  
1.34

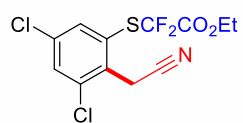

**2r**

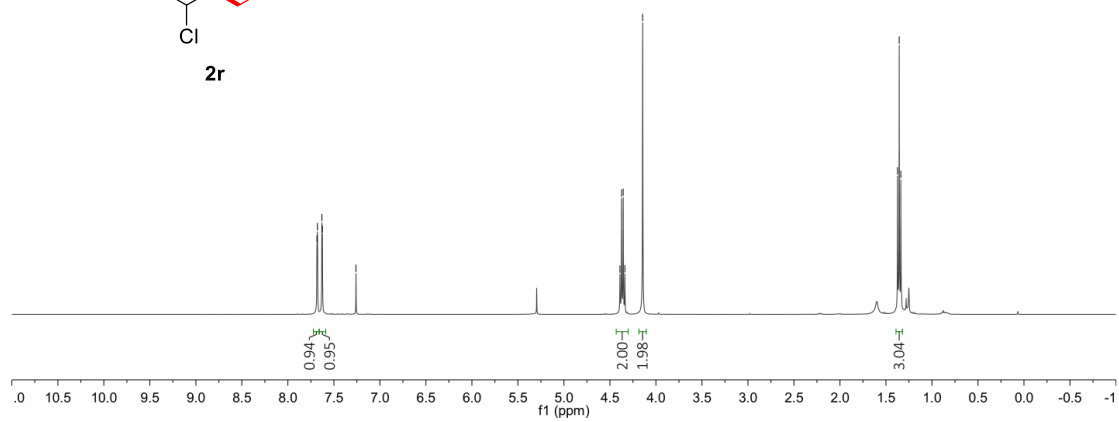

WHH-23-12-4-3

161.10  
160.79  
160.47  
137.56  
136.73  
135.35  
133.49  
133.00  
128.06  
122.64  
119.75  
116.86  
115.45

77.48  
77.16  
76.84  
64.56

20.97  
13.97

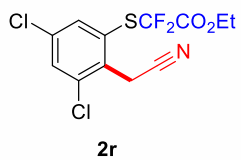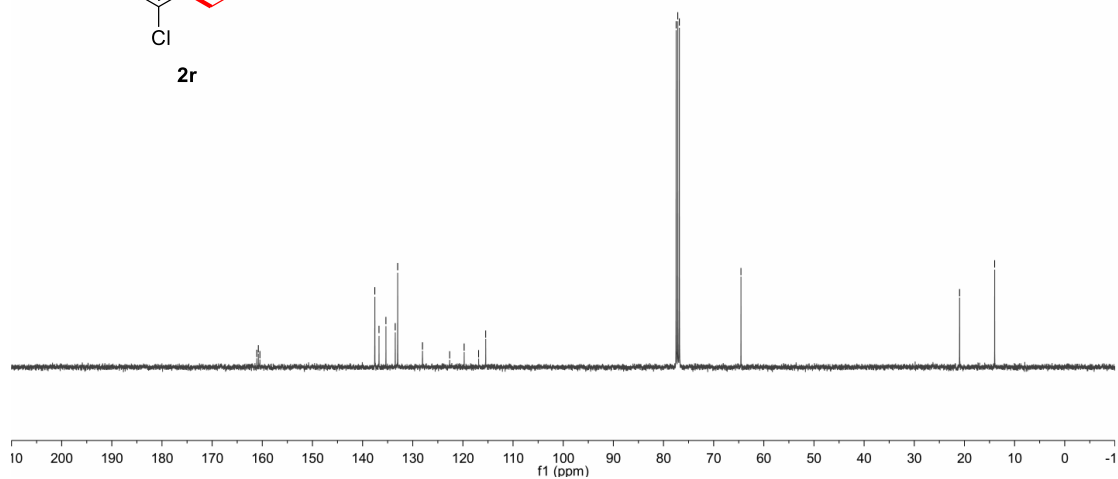

2s WHH-23-12-1-1

80.03

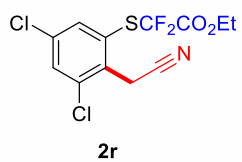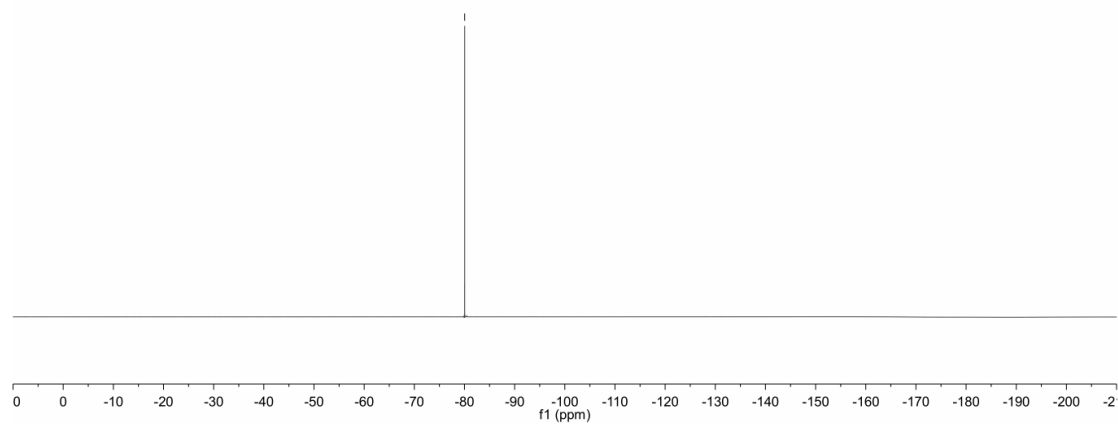

WHH-23-11-16-B1

7.40  
7.26  
7.19  
4.33  
4.31  
4.29  
4.27  
4.04  
2.46  
2.33  
1.33  
1.31  
1.29

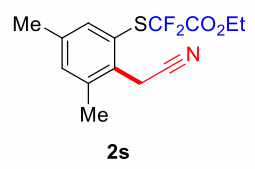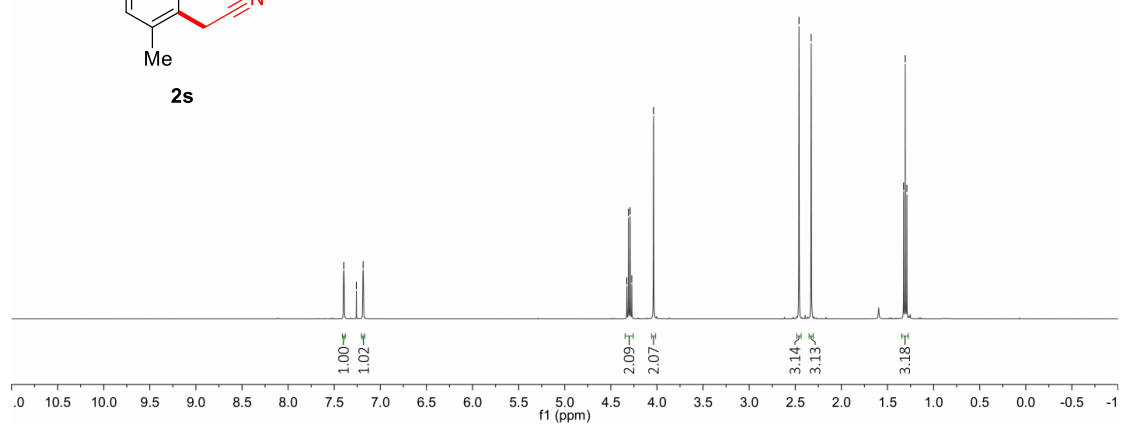

WHH-23-11-16-B1

161.62  
161.41  
161.20  
139.05  
138.74  
137.81  
135.04  
132.03  
124.35  
122.05  
120.14  
118.23  
117.02  
77.37  
77.16  
76.95  
64.03  
20.83  
20.57  
19.78  
13.93

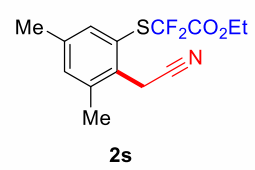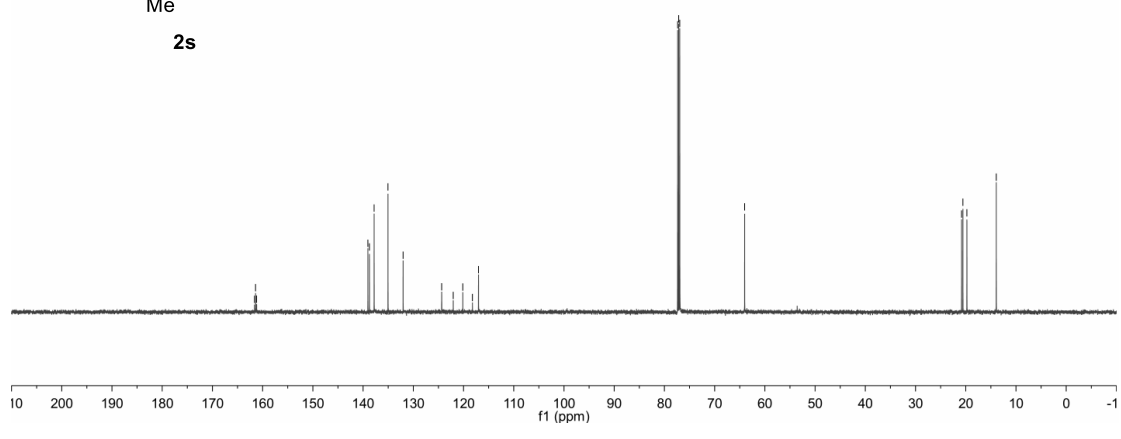

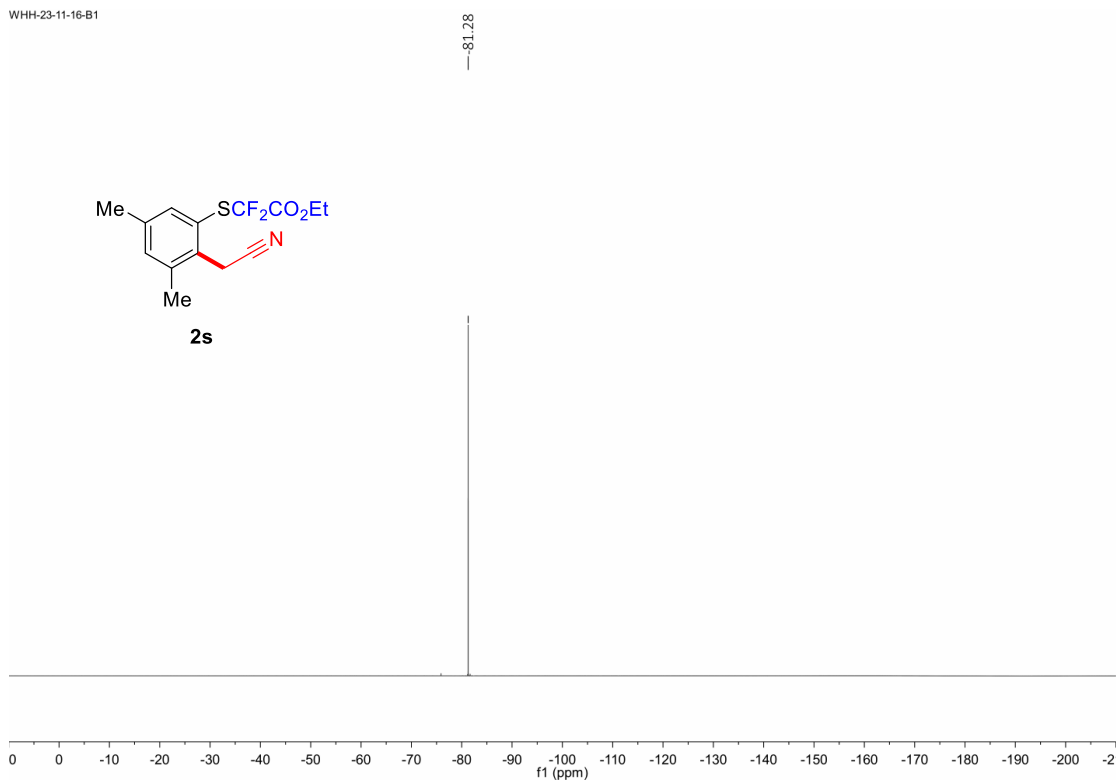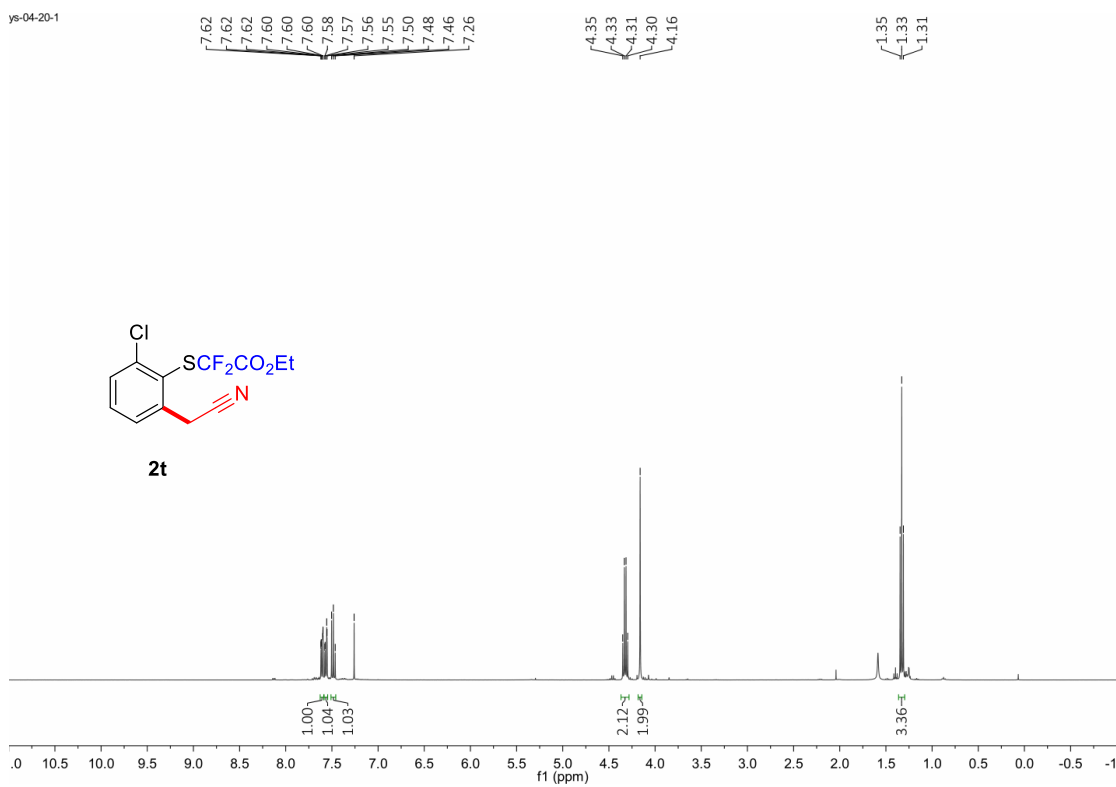

2u

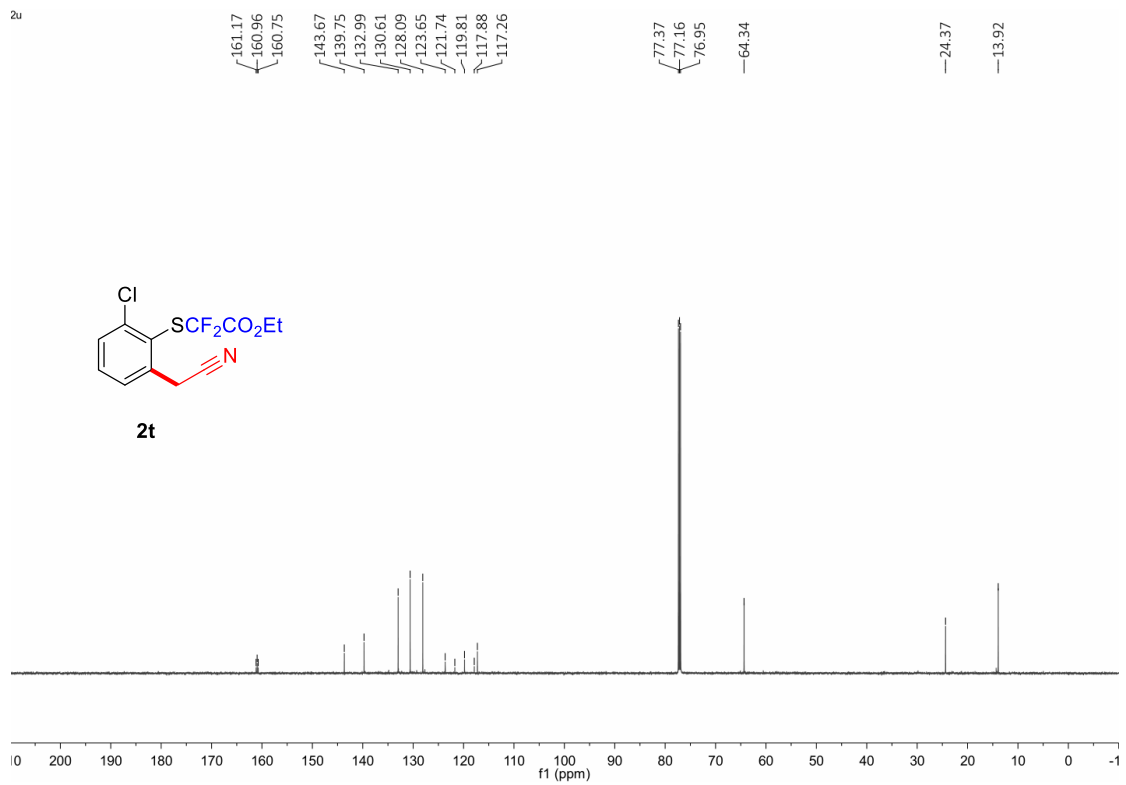

2u

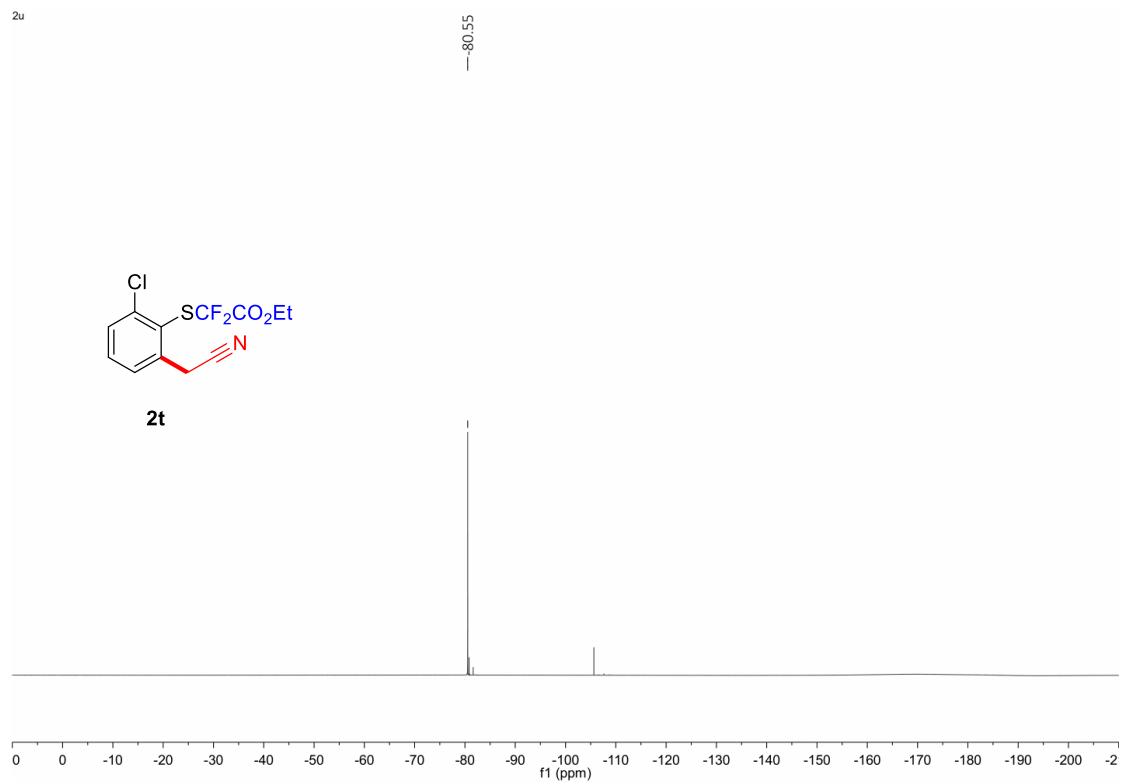

ys-04-19-z

7.75  
7.75  
7.75  
7.74  
7.74  
7.74  
7.65  
7.65  
7.64  
7.64  
7.41  
7.39  
7.38  
7.26

4.34  
4.33  
4.32  
4.31  
4.18

1.34  
1.33  
1.31

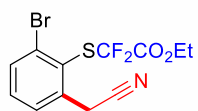

2u

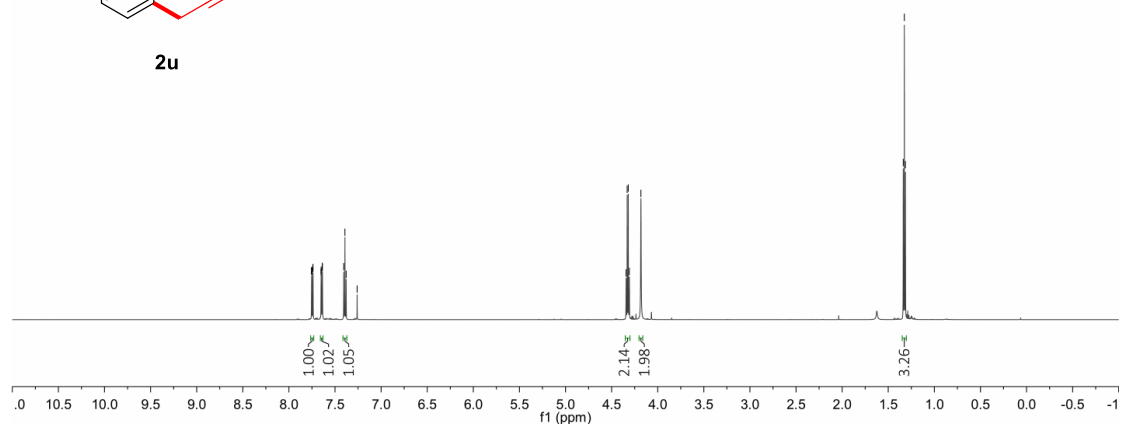

ye-04-19-z

161.21  
160.90  
160.58  
139.77  
135.07  
134.09  
133.15  
128.77  
125.72  
122.73  
119.83  
117.33  
116.94

77.48  
77.16  
76.84  
64.35

24.88  
13.90

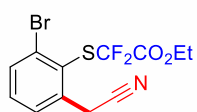

2u

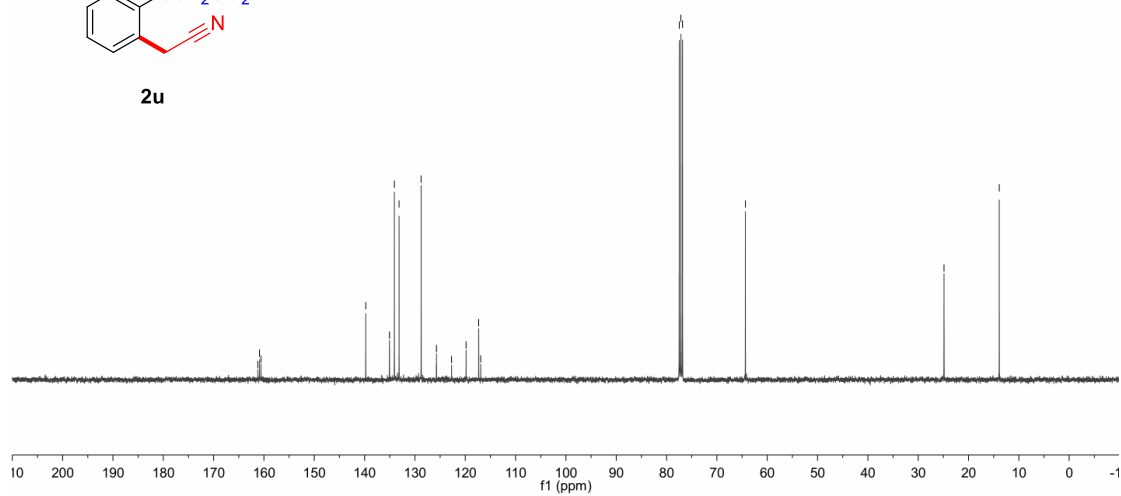

ye-04-19-2

—80.36

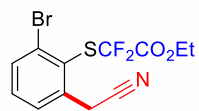

2u

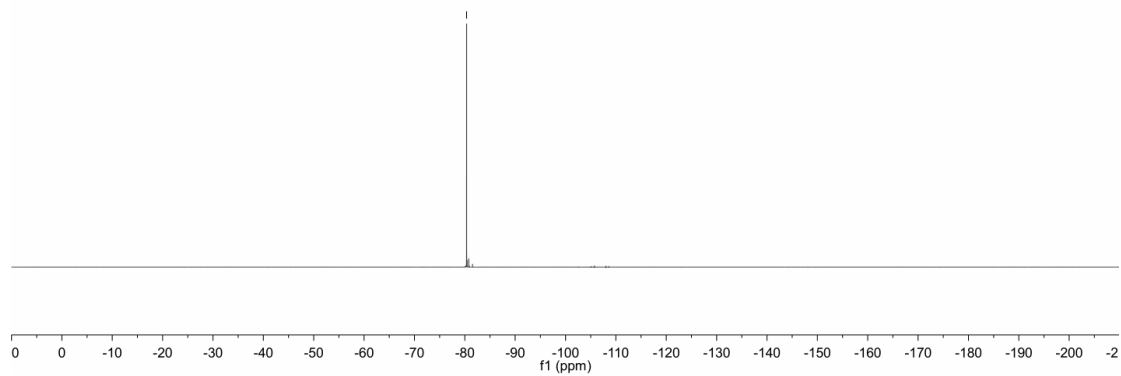

2w

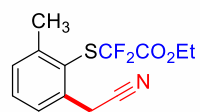

2v

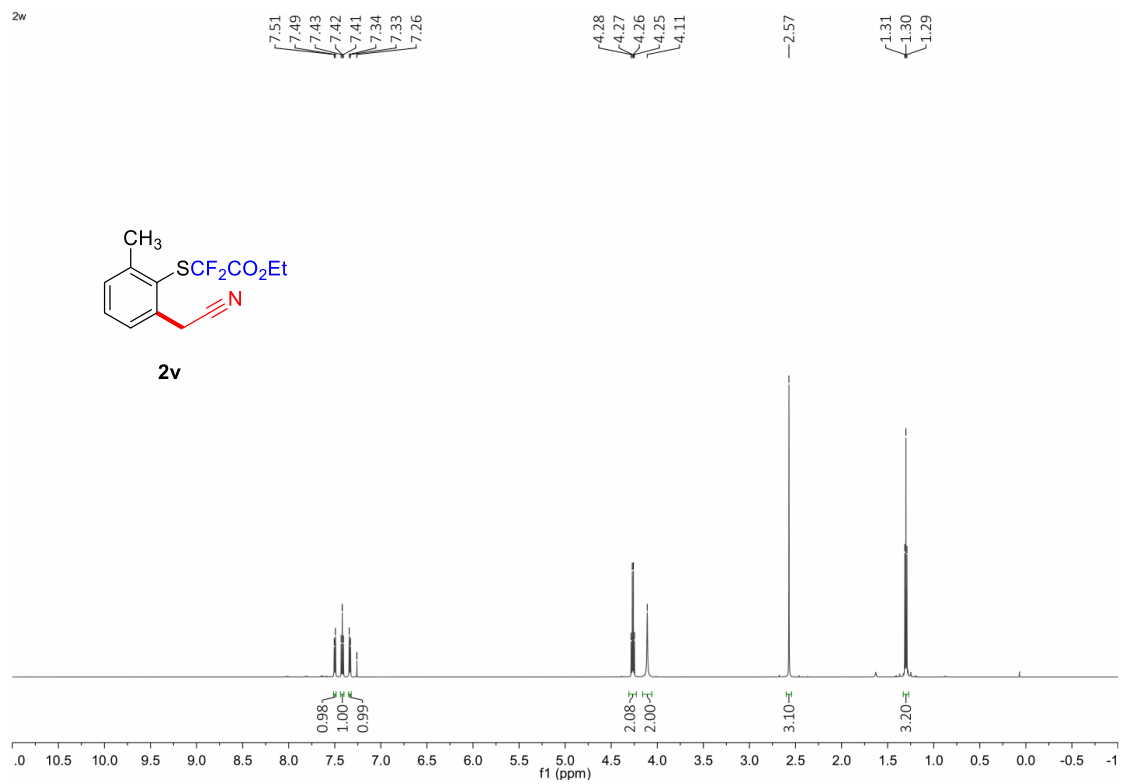

ys-04-14-5

161.63  
161.31  
161.00  
147.10  
137.74  
131.82  
131.06  
127.33  
123.64  
123.41  
120.76  
117.89

77.48  
77.16  
76.84  
64.10

23.87  
22.44  
13.85

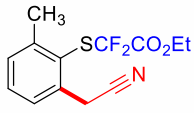

2v

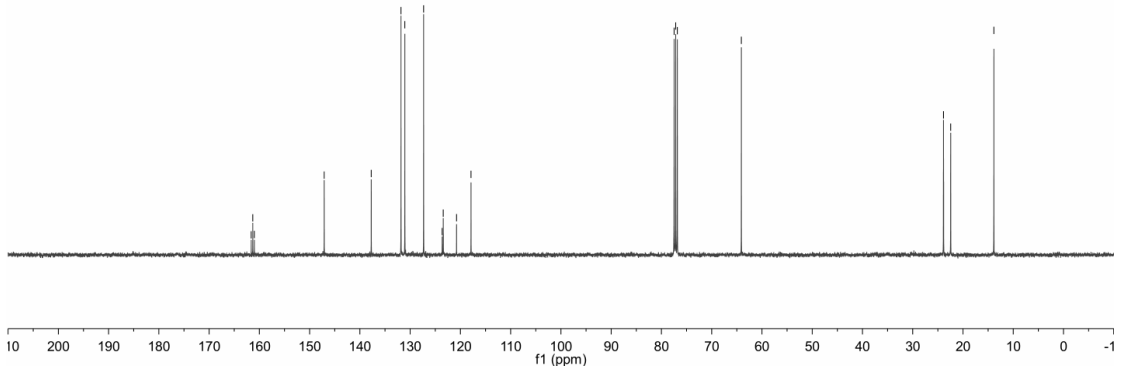

ys-04-14-5

-79.66

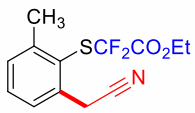

2v

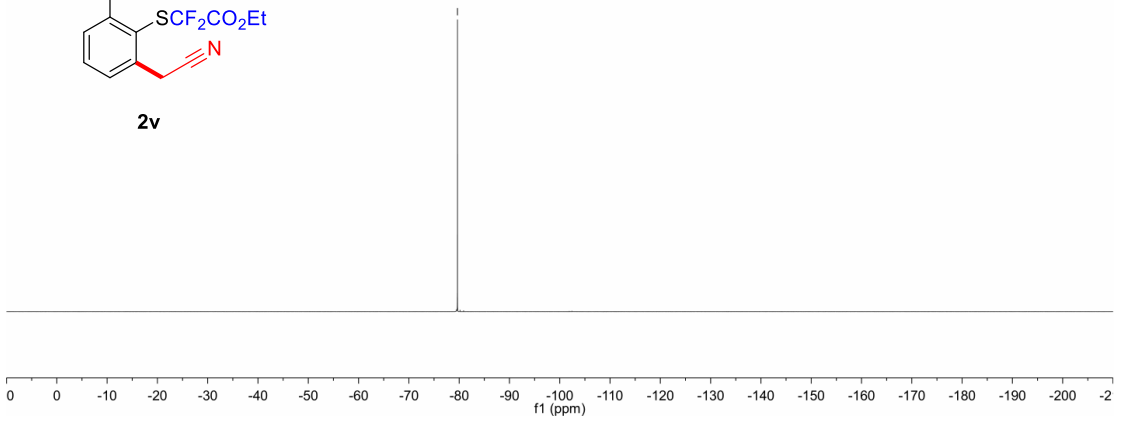



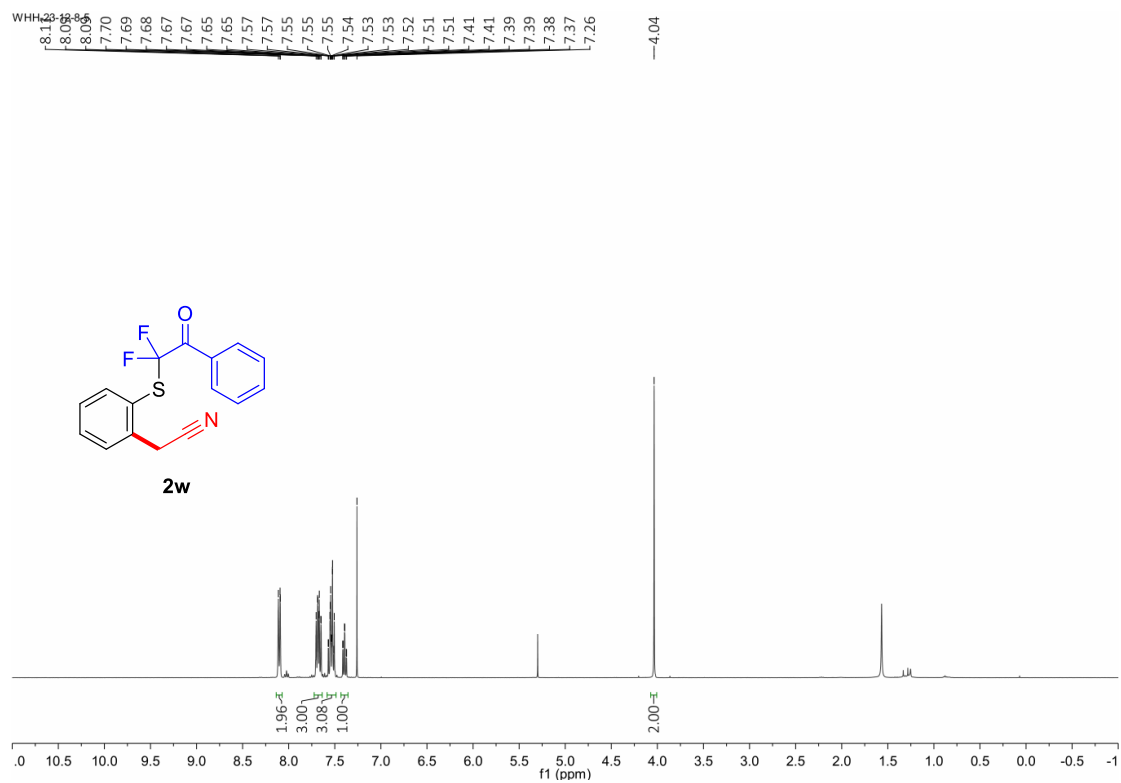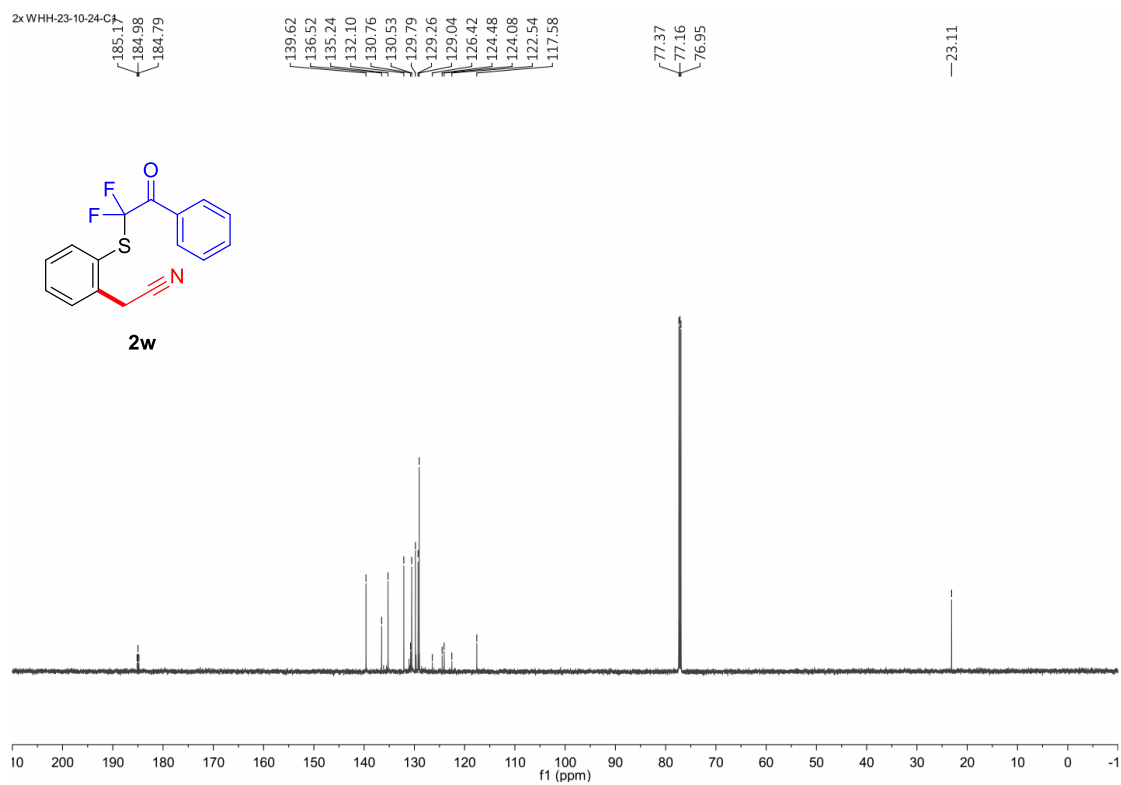

--75.44

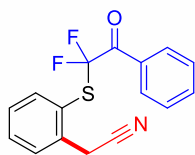

2w

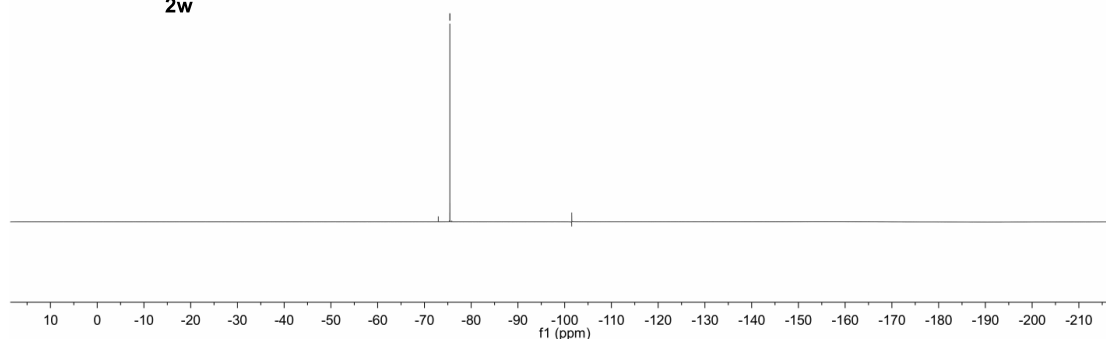

7.916  
7.917  
7.95  
7.95  
7.80  
7.80  
7.78  
7.76  
7.76  
7.67  
7.65  
7.65  
7.64  
7.64  
7.63  
7.62  
7.62  
7.60  
7.60  
7.59  
7.58  
7.57  
7.56  
7.55  
7.55  
7.42  
7.42  
7.40  
7.40  
7.38  
7.38  
7.15

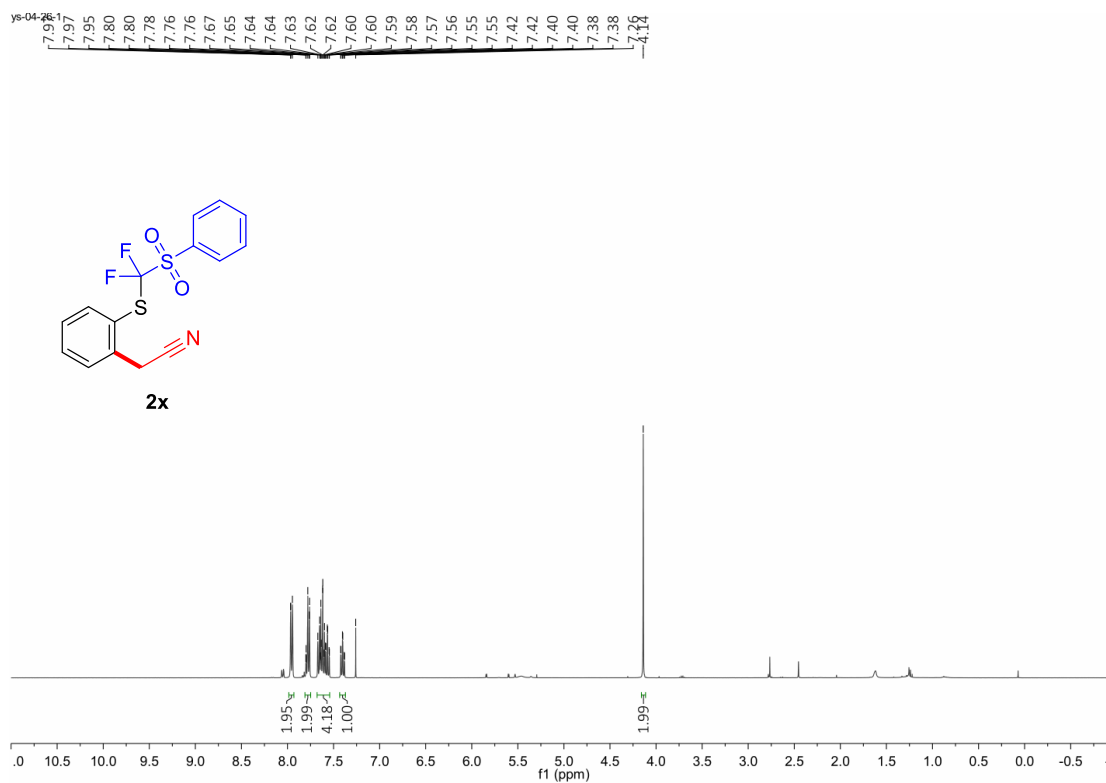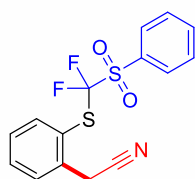

2x

ys-04-26-1

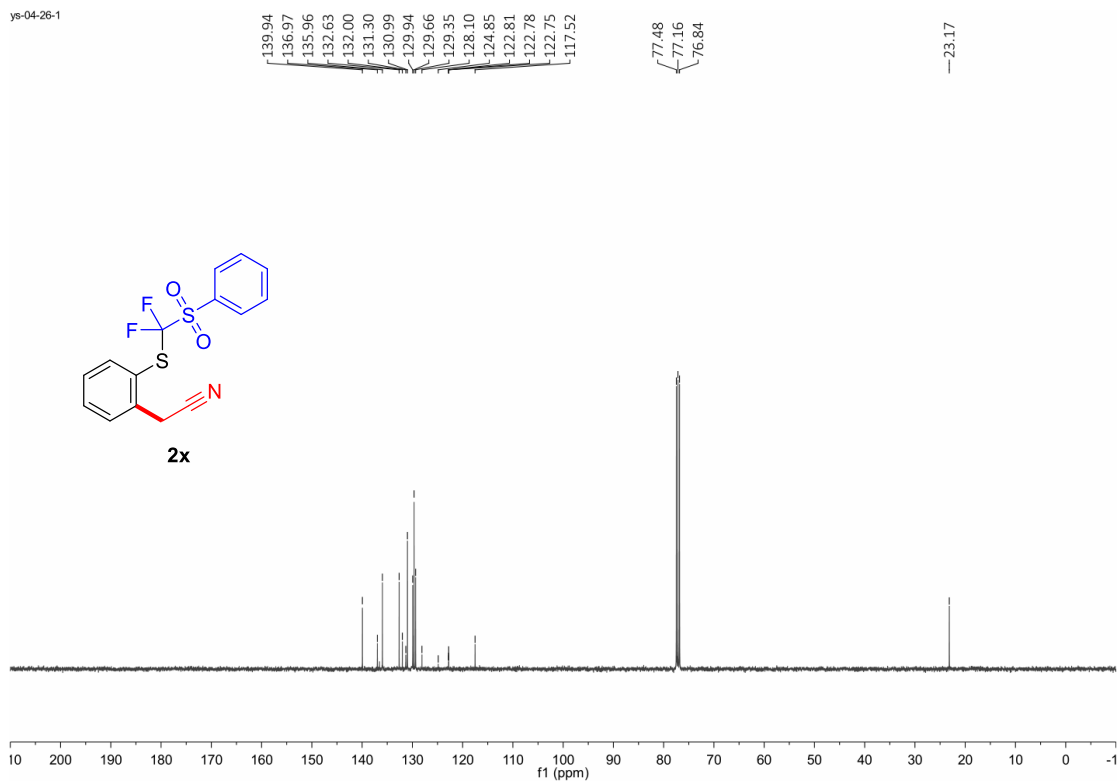

ys-04-19-1

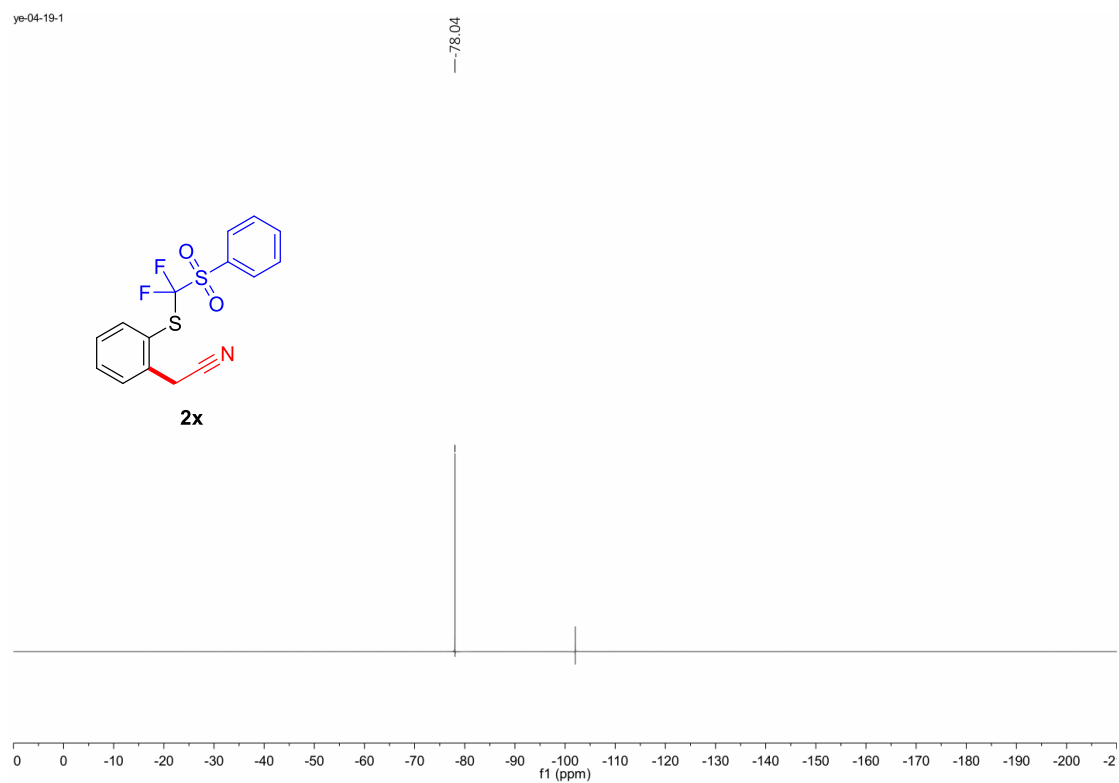

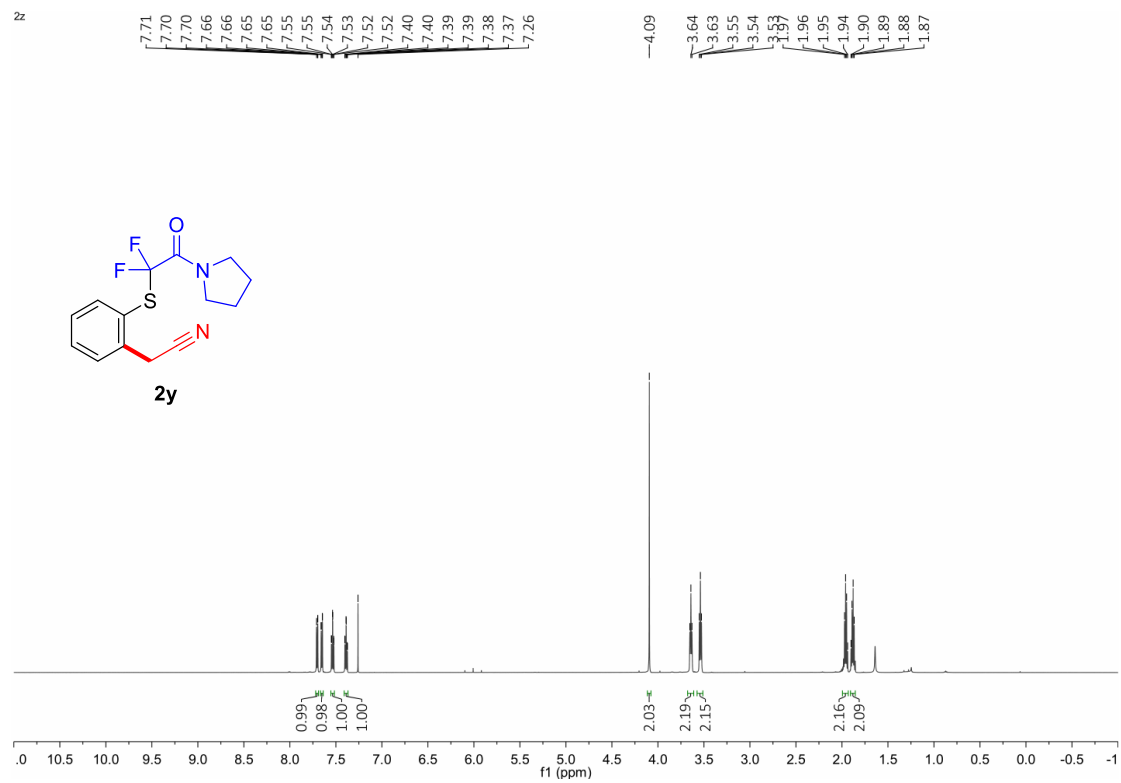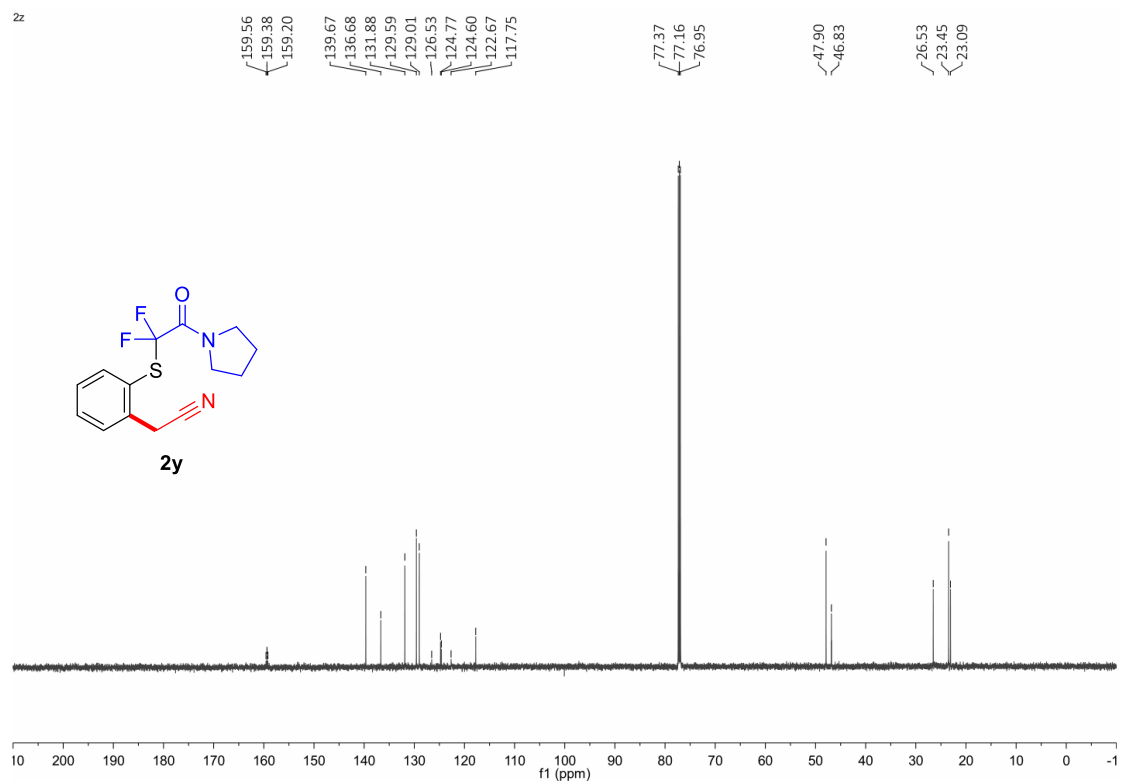

2z

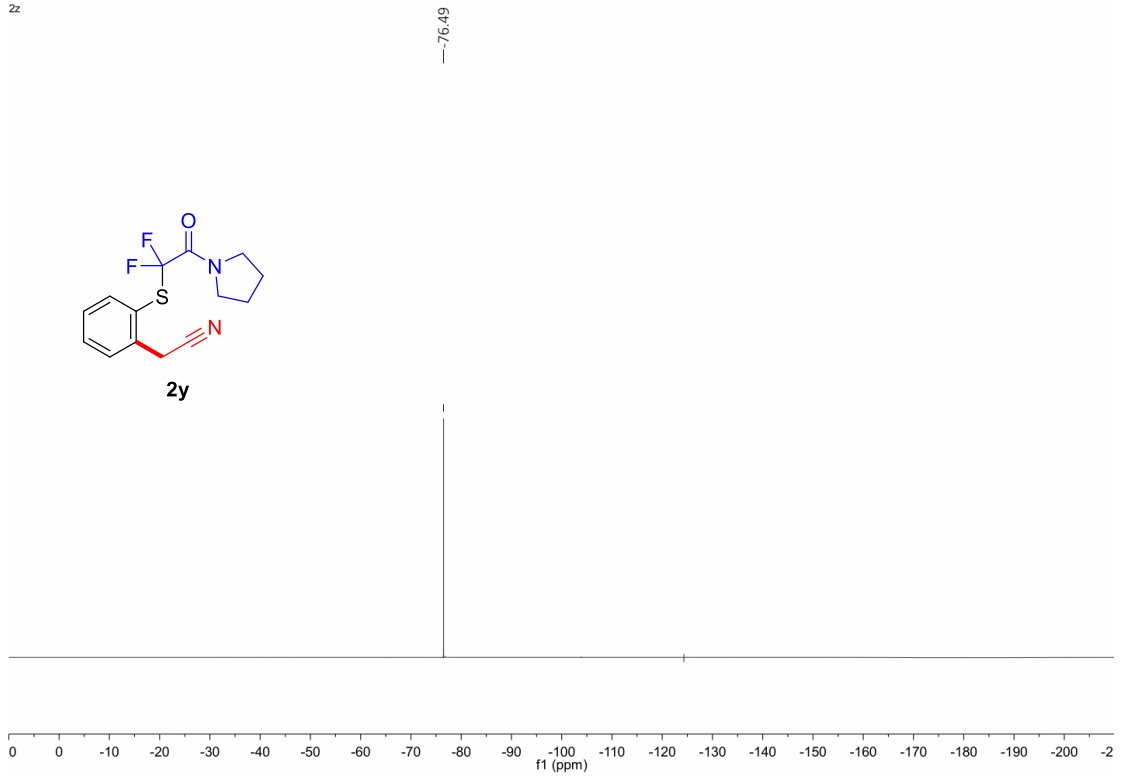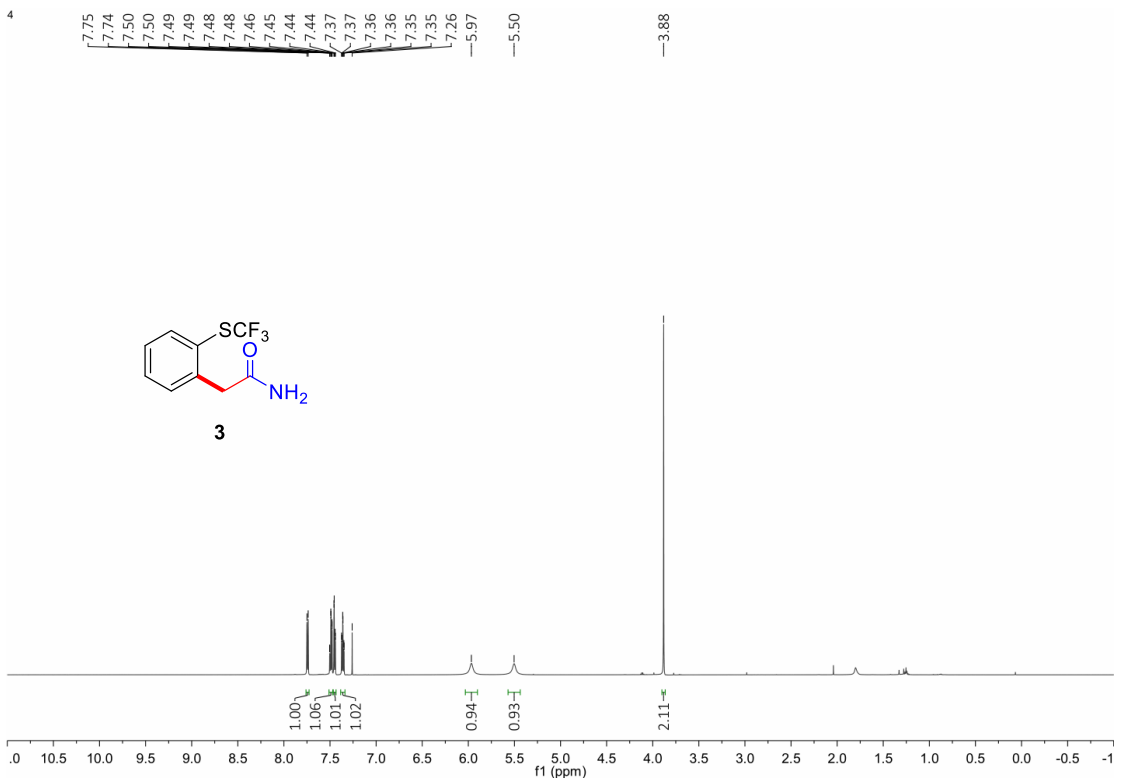

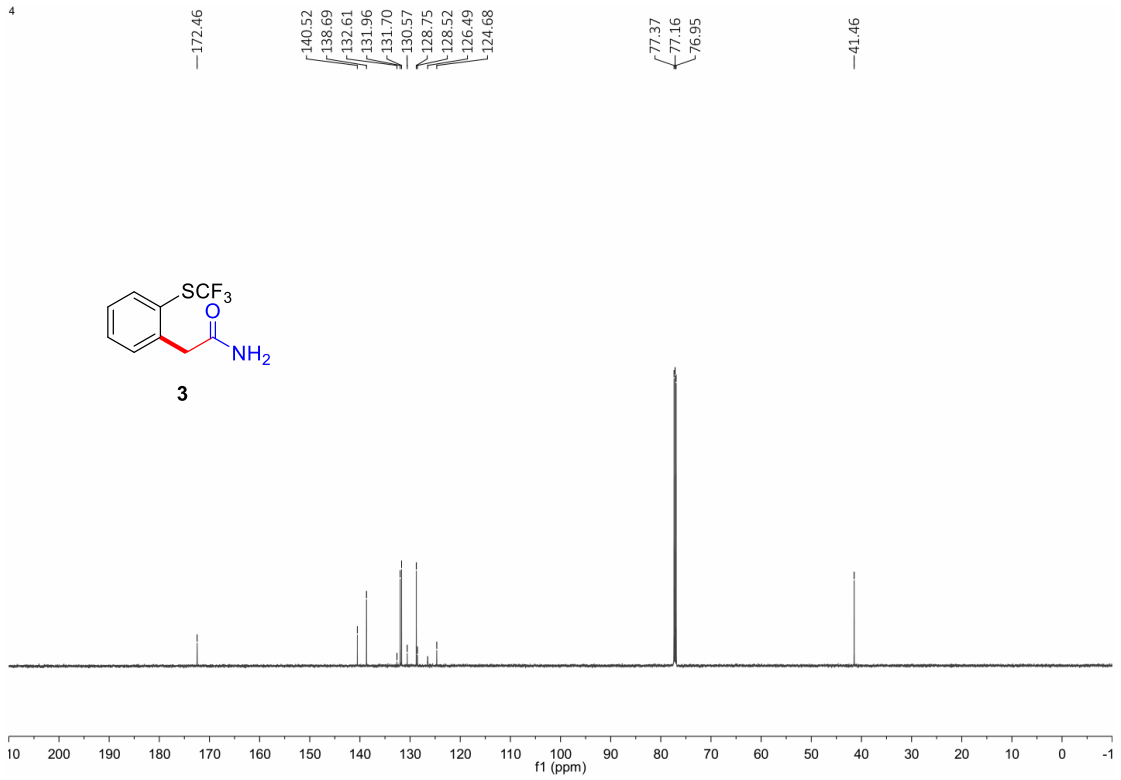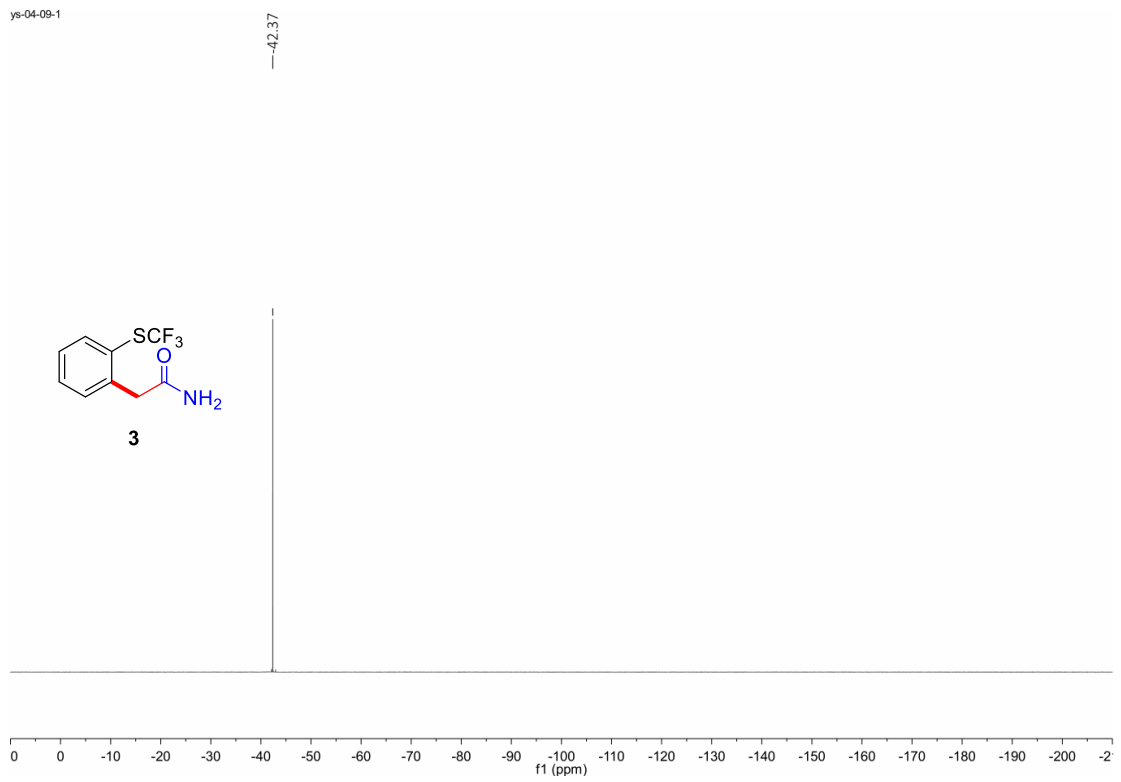

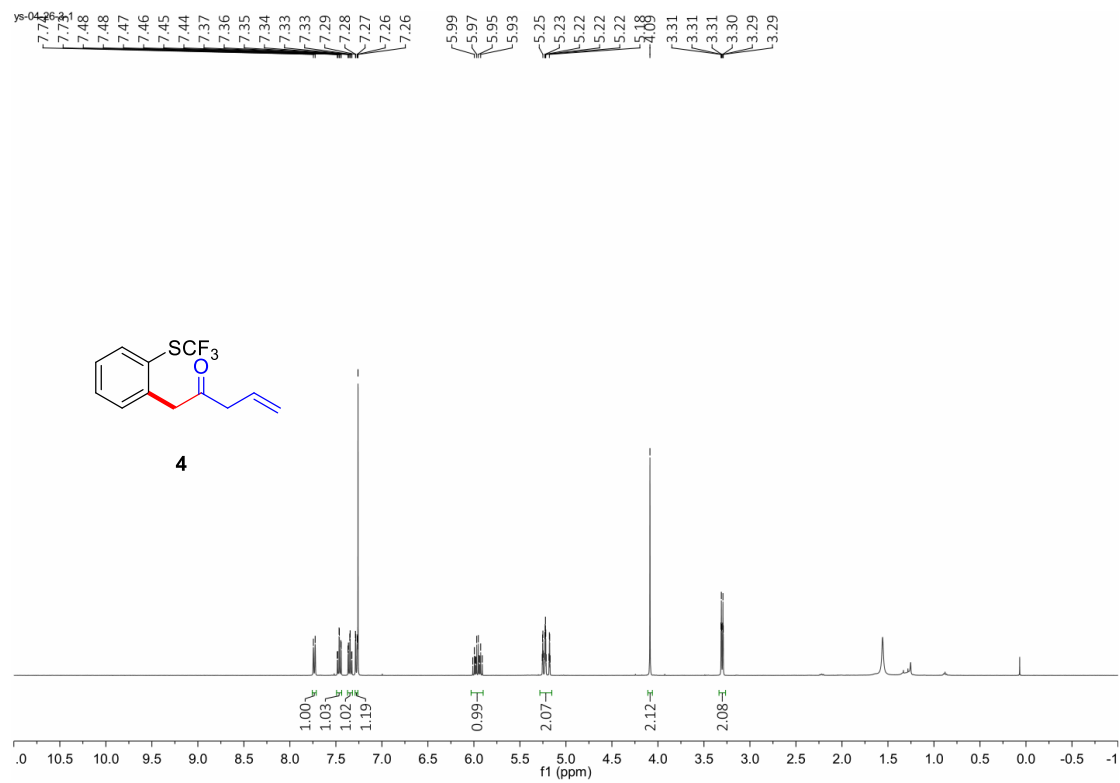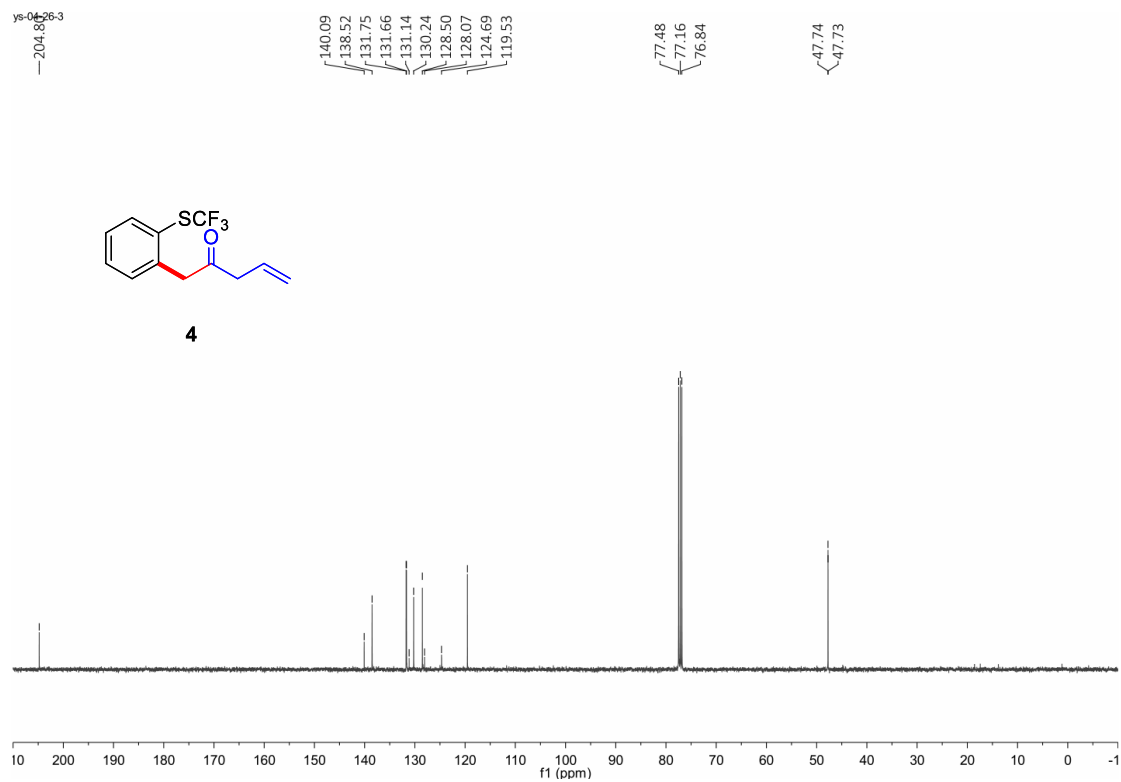

ys-04-26-3  
<sup>19</sup>F NMR (377 MHz, CDCl<sub>3</sub>) δ -42.57.

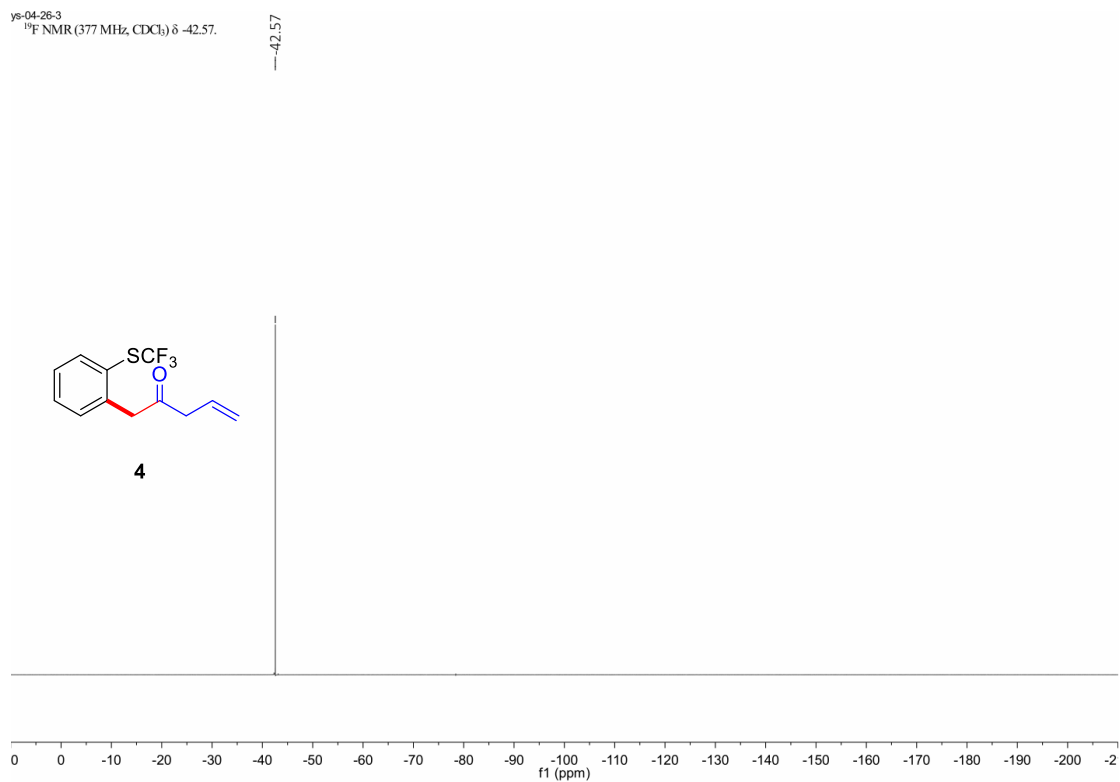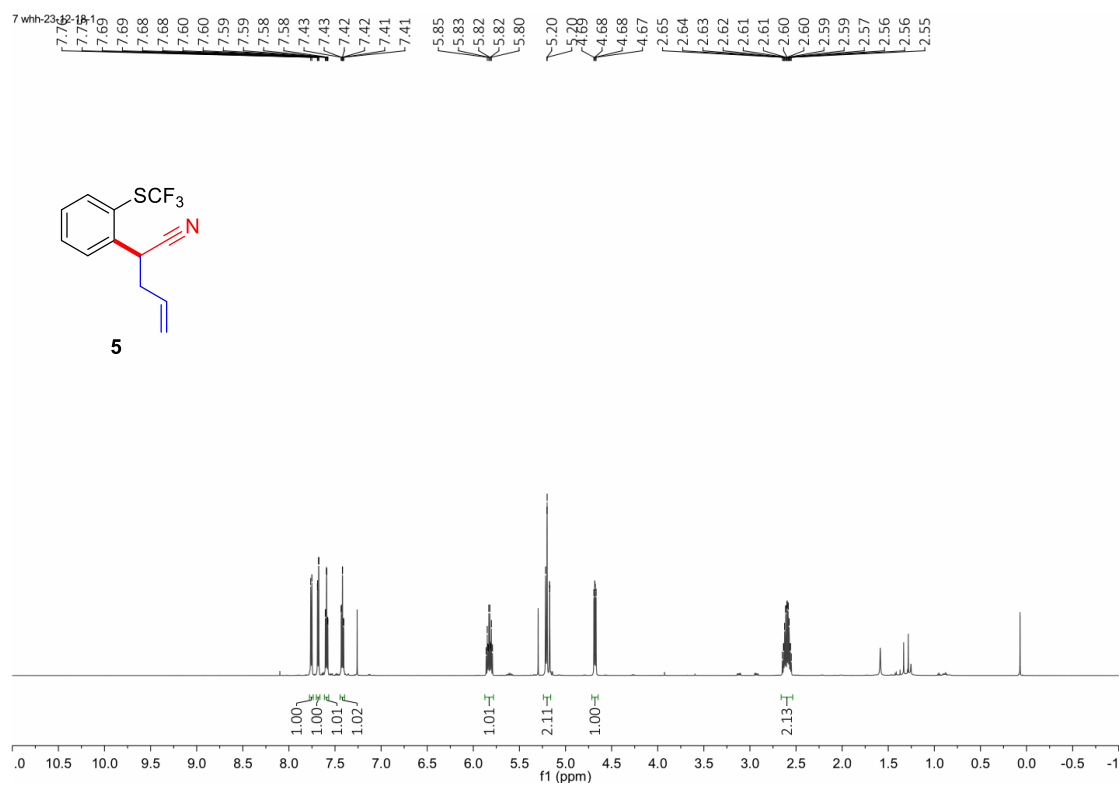



7 whh-23-12-18-1

141.06  
139.10  
132.58  
132.18  
132.09  
130.12  
129.51  
129.34  
128.07  
126.05  
122.85  
120.11  
120.08

77.37  
77.16  
76.95

39.64  
35.30

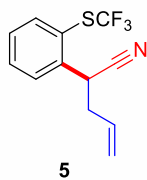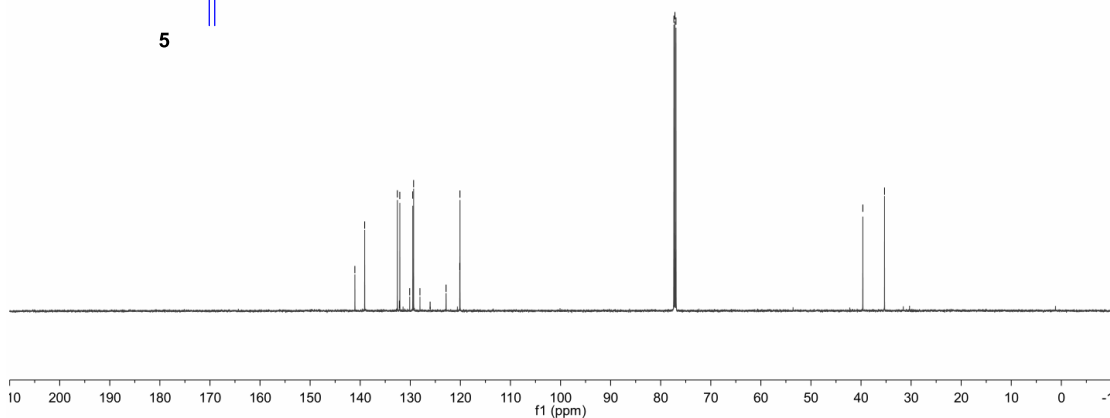

7 whh-23-12-18-1

42.25

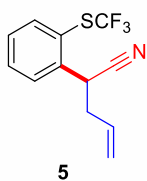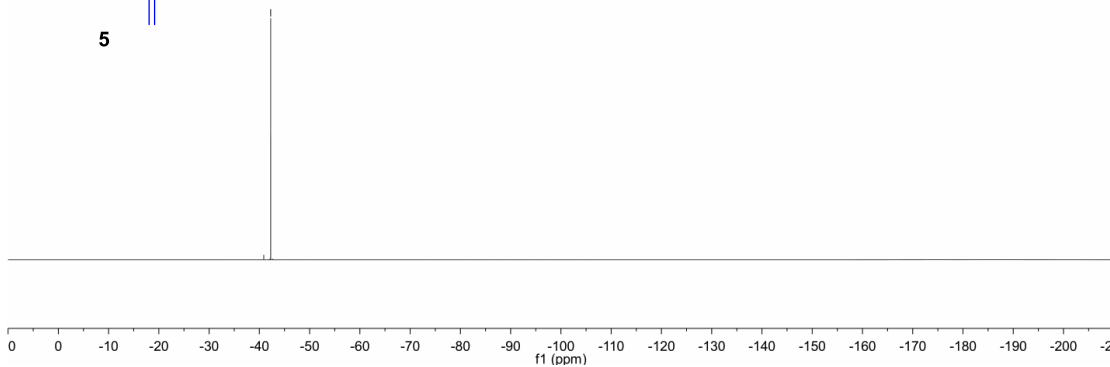

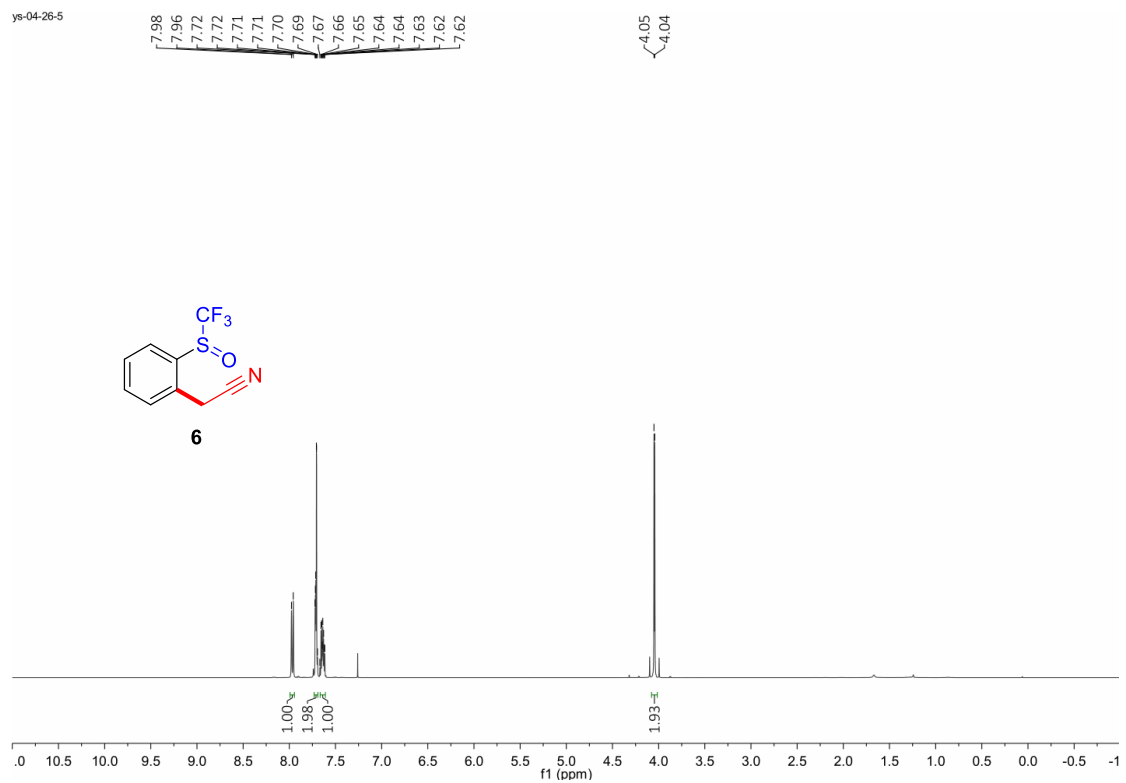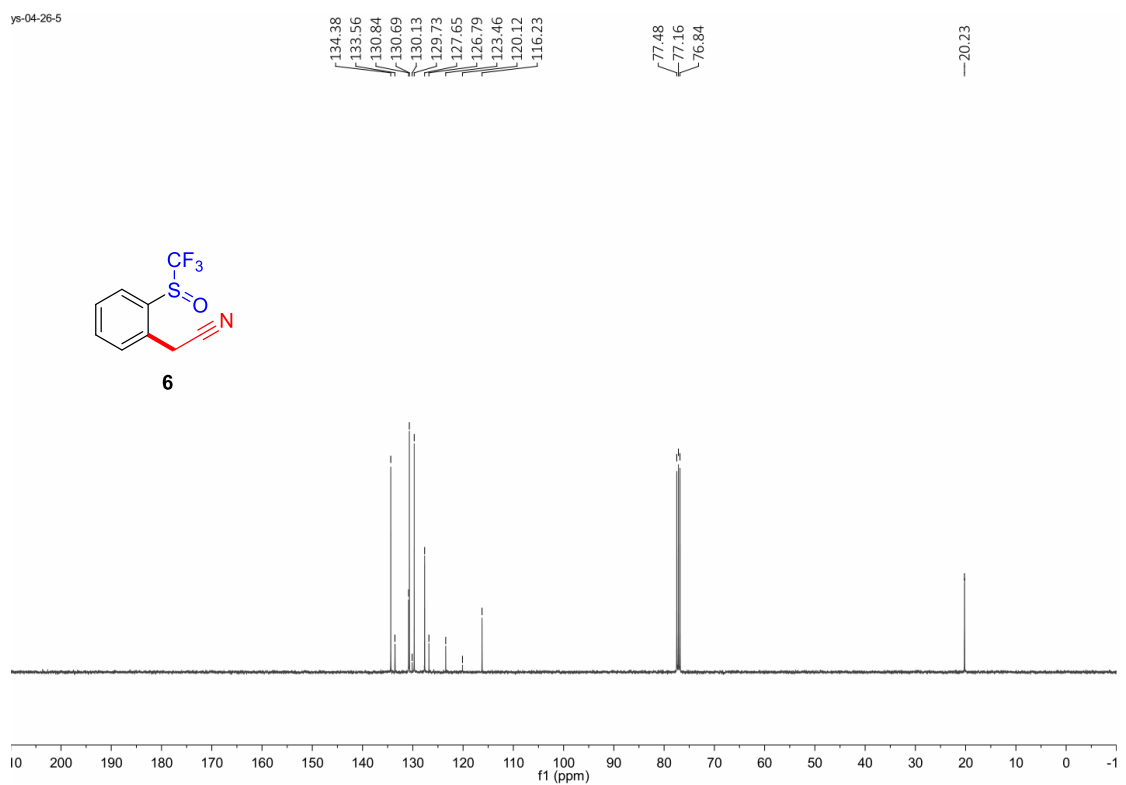

ys-04-z6-b

--72.80

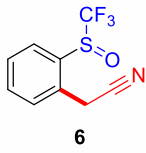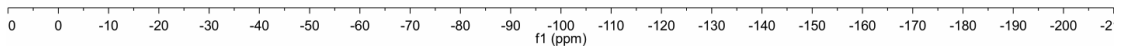

Supplement: d3ob02102e1.pdf [file d3ob02102e1.pdf]
